# Supplementary material for: A Putative Plasma Membrane Na+/H+ Antiporter GmSOS1 Is Critical for Salt Stress Tolerance in Glycine max
Source: Front Plant Sci. 2022 May 16;13:870695. doi: 10.3389/fpls.2022.870695 (PMC9149370; doi:10.3389/fpls.2022.870695)
Supplement: Supplementary file 2 [file Table_1.XLSX]

## Sheet: Control mutant vs wt root Up
Supplementary Table 1A. Genes whose expression are up-regulated in the roots of the gmsos1-1 when compared to the wild type under normal condition.
Soybean gene ID	log2FoldChange	FDR	Annotation	Arabidopsis homologous genes
Glyma.03G193100	28.0072	4.4641e-11	60s Acidic ribosomal protein	AT3G44590.1|Symbols:|60S acidic ribosomal protein family
Glyma.06G085900	10.3497	6.52939e-10	Transcriptional regulator	AT2G25830.1|Symbols:|YebC-related
Glyma.U043300	10.1993	3.43614e-14	short chain dehydrogenase	AT1G49670.1|Symbols:NQR|ARP protein (REF)
Glyma.06G241300	10.0835	3.81764e-14	Ankyrin repeat	AT4G10720.1|Symbols:|Ankyrin repeat family protein
Glyma.03G047700	9.9558	4.22959e-11	TIR domain; Leucine Rich Repeat; NB-ARC domain	AT5G17680.1|Symbols:|disease resistance protein (TIR-NBS-LRR class), putative
Glyma.05G119500	9.47668	1.2966e-10	Protein kinase domain; Leucine rich repeat N-terminal domain; Leucine Rich Repeat	AT4G33430.1|Symbols:BAK1, RKS10, SERK3, ELG, ATSERK3, ATBAK1|BRI1-associated receptor kinase
Glyma.07G081500	9.46258	1.73172e-11	Sin3 associated polypeptide p18 (SAP18)	AT2G45640.2|Symbols:SAP18|SIN3 associated polypeptide P18
Glyma.U004700	9.33401	2.29719e-11	NA	AT3G04770.2|Symbols:RPSAb|40s ribosomal protein SA B
Glyma.03G054100	8.87867	1.99637e-10	NB-ARC domain; TIR domain	AT5G36930.1|Symbols:|Disease resistance protein (TIR-NBS-LRR class) family
Glyma.03G046800	8.58717	2.66877e-07	NA	AT5G01700.2|Symbols:|Protein phosphatase 2C family protein
Glyma.18G180600	8.49037	0.00586771	NA	AT2G20480.1|Symbols:|unknown protein
Glyma.10G094000	8.32642	0.00846639	Transmembrane amino acid transporter protein	AT2G41190.1|Symbols:|Transmembrane amino acid transporter family protein
Glyma.14G203400	8.22488	1.20583e-06	Plant protein of unknown function (DUF641)	AT2G45260.1|Symbols:|Plant protein of unknown function (DUF641)
Glyma.04G233500	8.00188	1.62164e-06	Pentapeptide repeats (8 copies)	AT5G53490.2|Symbols:|Tetratricopeptide repeat (TPR)-like superfamily protein
Glyma.08G207600	7.94493	7.40978e-06	Glycosyl transferases group 1	AT1G52420.1|Symbols:|UDP-Glycosyltransferase superfamily protein
Glyma.17G186100	7.87198	3.85355e-06	NADH-ubiquinone/plastoquinone oxidoreductase chain 4L	ATMG00650.1|Symbols:NAD4L|NADH dehydrogenase subunit 4L
Glyma.08G118600	7.86985	2.86287e-05	Plant protein of unknown function (DUF641)	AT1G29300.1|Symbols:UNE1|Plant protein of unknown function (DUF641)
Glyma.03G054200	7.73523	2.22876e-05	NA	NA
Glyma.04G044100	7.71965	1.49352e-05	NA	AT5G43120.1|Symbols:|ARM-repeat/Tetratricopeptide repeat (TPR)-like protein
Glyma.03G048200	7.62029	1.75206e-05	NB-ARC domain	AT3G14470.1|Symbols:|NB-ARC domain-containing disease resistance protein
Glyma.03G048300	7.50346	3.36051e-05	NB-ARC domain	AT3G14460.1|Symbols:|LRR and NB-ARC domains-containing disease resistance protein
Glyma.03G048000	7.47647	9.24775e-06	NA	AT1G18950.1|Symbols:|DDT domain superfamily
Glyma.03G048600	7.36732	0.00015944	Leucine Rich Repeat	AT5G51630.3|Symbols:|Disease resistance protein (TIR-NBS-LRR class) family
Glyma.05G213600	7.35185	6.85695e-05	Acyl-coenzyme A:6-aminopenicillanic acid acyl-transferase	NA
Glyma.03G068200	7.32771	0.000213112	Trypsin and protease inhibitor	AT1G73330.1|Symbols:ATDR4, DR4|drought-repressed 4
Glyma.13G188800	7.27054	0.00285463	Domain of unknown function (DUF3403)	AT4G23180.1|Symbols:CRK10, RLK4|cysteine-rich RLK (RECEPTOR-like protein kinase) 10
Glyma.03G055300	7.03247	0.000639797	Leucine rich repeat N-terminal domain; Leucine Rich Repeat	AT4G13810.1|Symbols:AtRLP47, RLP47|receptor like protein 47
Glyma.11G111400	6.90213	0.00153834	Fructose-bisphosphate aldolase class-I	AT4G38970.1|Symbols:FBA2|fructose-bisphosphate aldolase 2
Glyma.09G101100	6.88204	0.00588573	EamA-like transporter family	AT3G28050.1|Symbols:|nodulin MtN21 /EamA-like transporter family protein
Glyma.12G117700	6.87903	0.00189331	Myb-like DNA-binding domain	AT2G20570.1|Symbols:GPRI1, GLK1, ATGLK1|GBF's pro-rich region-interacting factor 1
Glyma.03G047500	6.83609	0.0012672	Leucine Rich Repeat; NB-ARC domain	AT5G41750.2|Symbols:|Disease resistance protein (TIR-NBS-LRR class) family
Glyma.09G271000	6.78041	0.00246325	Cytochrome P450	AT5G24910.1|Symbols:CYP714A1|cytochrome P450, family 714, subfamily A, polypeptide 1
Glyma.08G037800	6.77263	0.00200691	NA	AT3G24630.1|Symbols:|unknown protein
Glyma.03G048800	6.61807	0.00488238	TIR domain	AT5G44510.1|Symbols:TAO1|target of AVRB operation1
Glyma.03G018200	6.60933	0.00359377	NA	AT3G25270.1|Symbols:|Ribonuclease H-like superfamily protein
Glyma.07G263500	6.49704	0.00619537	Peptidase inhibitor I9; Subtilase family	AT1G62340.1|Symbols:ALE1, ALE|PA-domain containing subtilase family protein
Glyma.12G004700	6.48018	0.00817915	Glycosyl hydrolase family 9	AT1G70710.1|Symbols:ATGH9B1, CEL1, GH9B1|glycosyl hydrolase 9B1
Glyma.07G126600	6.45272	0.00800291	Family of unknown function (DUF706)	AT2G19800.1|Symbols:MIOX2|myo-inositol oxygenase 2
Glyma.08G036300	6.43103	0.00806955	S1 RNA binding domain	AT4G29060.2|Symbols:emb2726|elongation factor Ts family protein
Glyma.02G019300	6.09991	3.87896e-18	Myb-like DNA-binding domain	AT2G02820.2|Symbols:MYB88|myb domain protein 88
Glyma.13G167000	6.06604	3.14713e-07	Protein kinase domain; S-locus glycoprotein family; D-mannose binding lectin	AT1G34300.1|Symbols:|lectin protein kinase family protein
Glyma.13G184800	5.84414	5.00577e-105	NB-ARC domain	AT3G14470.1|Symbols:|NB-ARC domain-containing disease resistance protein
Glyma.04G237000	5.69218	0.000278081	GHMP kinases N terminal domain; GHMP kinases C terminal	AT1G31910.1|Symbols:|GHMP kinase family protein
Glyma.15G251800	5.33998	0.000517129	Glutathione S-transferase, N-terminal domain; Glutathione S-transferase, C-terminal domain	AT1G78380.1|Symbols:ATGSTU19, GST8, GSTU19|glutathione S-transferase TAU 19
Glyma.03G074200	5.09762	0.000666591	NA	AT3G54060.2|Symbols:|unknown protein
Glyma.14G165700	4.86418	0.00863757	Protein kinase domain	AT4G08500.1|Symbols:MEKK1, ATMEKK1, MAPKKK8, ARAKIN|MAPK/ERK kinase kinase 1
Glyma.12G156100	4.7018	0.00648617	NA	AT2G29080.1|Symbols:ftsh3|FTSH protease 3
Glyma.07G063100	4.62225	0.00218154	NA	AT1G12220.2|Symbols:RPS5|Disease resistance protein (CC-NBS-LRR class) family
Glyma.18G002000	4.26876	0.000492262	RNA recognition motif. (a.k.a. RRM, RBD, or RNP domain)	AT4G13850.3|Symbols:ATGRP2|glycine-rich RNA-binding protein 2
Glyma.03G053500	3.88466	2.43983e-07	TIR domain; NB-ARC domain	AT5G36930.2|Symbols:|Disease resistance protein (TIR-NBS-LRR class) family
Glyma.03G036800	3.80177	1.37471e-71	Transcription factor TFIID (or TATA-binding protein, TBP)	AT1G55520.2|Symbols:TBP2, ATTBP2|TATA binding protein 2
Glyma.03G020800	3.77608	4.29064e-208	C2 domain	AT3G61050.2|Symbols:NTMC2TYPE4, NTMC2T4|Calcium-dependent lipid-binding (CaLB domain) family protein
Glyma.07G204800	3.60918	1.29929e-07	Lipase (class 3)	AT4G18550.1|Symbols:|alpha/beta-Hydrolases superfamily protein
Glyma.18G247100	3.42133	9.39964e-10	UDP-glucoronosyl and UDP-glucosyl transferase	AT1G05675.1|Symbols:|UDP-Glycosyltransferase superfamily protein
Glyma.13G194900	3.37271	7.9764e-73	TIR domain; NB-ARC domain	AT5G36930.2|Symbols:|Disease resistance protein (TIR-NBS-LRR class) family
Glyma.06G235900	3.29369	2.46078e-71	Aminotransferase class I and II	AT5G53970.1|Symbols:|Tyrosine transaminase family protein
Glyma.08G060500	3.29196	3.31711e-12	S-locus glycoprotein family; D-mannose binding lectin; Protein tyrosine kinase; PAN-like domain	AT4G21390.1|Symbols:B120|S-locus lectin protein kinase family protein
Glyma.03G254300	3.13511	5.52777e-54	Glycosyl hydrolases family 18	AT5G24090.1|Symbols:ATCHIA, CHIA|chitinase A
Glyma.03G047000	2.92931	6.13012e-21	NB-ARC domain	AT3G14470.1|Symbols:|NB-ARC domain-containing disease resistance protein
Glyma.07G124400	2.84132	0.00423414	2OG-Fe(II) oxygenase superfamily	AT3G13610.1|Symbols:|2-oxoglutarate (2OG) and Fe(II)-dependent oxygenase superfamily protein
Glyma.11G195200	2.77578	9.03549e-101	Major Facilitator Superfamily	AT5G60770.1|Symbols:ATNRT2.4, NRT2.4|nitrate transporter 2.4
Glyma.03G046500	2.77527	3.81319e-30	NB-ARC domain	AT3G14470.1|Symbols:|NB-ARC domain-containing disease resistance protein
Glyma.13G190800	2.71509	1.70724e-35	NB-ARC domain; Leucine Rich Repeat	AT3G14470.1|Symbols:|NB-ARC domain-containing disease resistance protein
Glyma.06G084200	2.68186	1.32788e-08	Phosphorylase superfamily	AT4G28940.1|Symbols:|Phosphorylase superfamily protein
Glyma.07G193400	2.62426	2.80946e-07	Protein of unknown function (DUF B2219); Common central domain of tyrosinase; Polyphenol oxidase middle domain	NA
Glyma.10G296400	2.58061	0.0053717	Cytochrome P450	AT3G52970.1|Symbols:CYP76G1|cytochrome P450, family 76, subfamily G, polypeptide 1
Glyma.12G062300	2.44599	6.53405e-07	Myb-like DNA-binding domain	AT1G07540.1|Symbols:TRFL2|TRF-like 2
Glyma.16G144500	2.44417	0.000667637	Aminotransferase class-V	AT2G23520.1|Symbols:|Pyridoxal phosphate (PLP)-dependent transferases superfamily protein
Glyma.02G247100	2.40972	0.00792093	Myb-like DNA-binding domain	AT4G38620.1|Symbols:ATMYB4, MYB4|myb domain protein 4
Glyma.13G213100	2.38492	1.18519e-05	WD domain, G-beta repeat	AT4G03020.2|Symbols:|transducin family protein / WD-40 repeat family protein
Glyma.11G154900	2.3686	5.73168e-05	Extensin-like protein repeat	NA
Glyma.12G221100	2.36785	0.00612634	Calcineurin-like phosphoesterase	AT2G16430.2|Symbols:PAP10, ATPAP10|purple acid phosphatase 10
Glyma.17G133000	2.35523	0.00878798	WD domain, G-beta repeat	AT4G22910.1|Symbols:FZR2, CCS52A1|FIZZY-related 2
Glyma.01G212800	2.35103	1.4471e-135	ACT domain	AT1G12420.1|Symbols:ACR8|ACT domain repeat 8
Glyma.12G190900	2.32533	0.0081301	NA	AT2G27180.1|Symbols:|unknown protein
Glyma.03G024800	2.28411	2.52556e-08	Glycosyl hydrolases family 18	NA
Glyma.15G021800	2.23185	5.04076e-54	Protein tyrosine kinase	AT1G51800.1|Symbols:|Leucine-rich repeat protein kinase family protein
Glyma.15G245600	2.22689	3.05879e-08	C2 domain	AT1G53590.1|Symbols:NTMC2TYPE6.1, NTMC2T6.1|Calcium-dependent lipid-binding (CaLB domain) family protein
Glyma.15G260700	2.22646	4.34884e-08	Eukaryotic aspartyl protease	AT2G35615.1|Symbols:|Eukaryotic aspartyl protease family protein
Glyma.17G174100	2.18846	0.000798647	Lipase (class 3)	AT5G42930.1|Symbols:|alpha/beta-Hydrolases superfamily protein
Glyma.20G204800	2.18682	0.00491128	NA	AT3G01680.1|Symbols:|unknown protein (TAIR:AT3G01670.1)
Glyma.20G015600	2.15337	0.00175462	Serine carboxypeptidase	AT1G15000.1|Symbols:scpl50|serine carboxypeptidase-like 50
Glyma.03G025000	2.09751	9.74321e-47	Glycosyl hydrolases family 18	NA
Glyma.04G035600	2.09353	3.36772e-12	Cytochrome P450	AT4G31940.1|Symbols:CYP82C4|cytochrome P450, family 82, subfamily C, polypeptide 4
Glyma.03G024900	2.08727	6.32188e-38	Glycosyl hydrolases family 18	NA
Glyma.13G282900	2.08644	0.00708233	NA	AT5G54490.1|Symbols:PBP1|pinoid-binding protein 1
Glyma.03G035400	2.08357	0.000149815	PPR repeat	AT3G42630.1|Symbols:|Pentatricopeptide repeat (PPR) superfamily protein
Glyma.13G193500	2.0682	4.52379e-16	Cyclophilin type peptidyl-prolyl cis-trans isomerase/CLD	AT2G38730.1|Symbols:|Cyclophilin-like peptidyl-prolyl cis-trans isomerase family protein
Glyma.10G113000	2.05738	4.03019e-09	NA	AT5G04610.1|Symbols:|S-adenosyl-L-methionine-dependent methyltransferases superfamily protein
Glyma.02G157300	2.04079	0.00460097	Myb-like DNA-binding domain	AT4G39250.1|Symbols:ATRL1, RSM2, RL1|RAD-like 1
Glyma.03G024500	2.02639	2.42405e-34	Glycosyl hydrolases family 18	NA
Glyma.13G163200	1.98911	0.000162465	CYTH domain	AT2G11890.1|Symbols:|adenylate cyclases
Glyma.02G064400	1.98117	9.58741e-130	Ribonuclease T2 family	AT2G02990.1|Symbols:RNS1, ATRNS1|ribonuclease 1
Glyma.14G111600	1.9659	0.00543956	AP2 domain	AT5G25190.1|Symbols:|Integrase-type DNA-binding superfamily protein
Glyma.06G182700	1.9651	1.44352e-15	Carbonic anhydrase	AT5G14740.2|Symbols:CA2, CA18, BETA CA2|carbonic anhydrase 2
Glyma.04G207600	1.95368	0.00325946	CBS domain; PB1 domain	AT3G52950.2|Symbols:|CBS / octicosapeptide/Phox/Bemp1 (PB1) domains-containing protein
Glyma.13G217400	1.93375	4.07285e-16	Cytochrome P450	AT2G34500.1|Symbols:CYP710A1|cytochrome P450, family 710, subfamily A, polypeptide 1
Glyma.08G118800	1.92418	0.00605155	Glutathione S-transferase, C-terminal domain; Glutathione S-transferase, N-terminal domain	AT2G29420.1|Symbols:ATGSTU7, GST25, GSTU7|glutathione S-transferase tau 7
Glyma.11G203400	1.89976	0.00620809	OPT oligopeptide transporter protein	AT1G65730.1|Symbols:YSL7|YELLOW STRIPE like 7
Glyma.13G323800	1.8987	1.40268e-73	Major Facilitator Superfamily	AT5G60770.1|Symbols:ATNRT2.4, NRT2.4|nitrate transporter 2.4
Glyma.03G024600	1.89256	1.87977e-20	NA	NA
Glyma.17G002800	1.88041	2.83222e-05	No apical meristem (NAM) protein	AT2G02450.2|Symbols:ANAC034, ANAC035, LOV1, NAC035|NAC domain containing protein 35
Glyma.09G278100	1.87126	1.87771e-05	NA	AT2G40435.1|Symbols:|transcription regulators (TAIR:AT3G56220.1)
Glyma.03G131200	1.86936	9.33865e-09	2OG-Fe(II) oxygenase superfamily	AT1G52800.1|Symbols:|2-oxoglutarate (2OG) and Fe(II)-dependent oxygenase superfamily protein
Glyma.17G049800	1.8537	4.29019e-32	Cupin	AT5G20630.1|Symbols:GLP3, GLP3A, GLP3B, ATGER3, GER3|germin 3
Glyma.15G042400	1.82837	0.000550671	Exo70 exocyst complex subunit	AT5G59730.2|Symbols:ATEXO70H7, EXO70H7|exocyst subunit exo70 family protein H7
Glyma.06G004400	1.81357	7.52388e-05	Glycosyl hydrolase family 10	AT4G38650.1|Symbols:|Glycosyl hydrolase family 10 protein
Glyma.15G068300	1.80836	0.00346667	Alcohol dehydrogenase GroES-like domain; Zinc-binding dehydrogenase	AT4G21580.1|Symbols:|oxidoreductase, zinc-binding dehydrogenase family protein
Glyma.10G064200	1.80042	0.00345023	Exostosin family	AT5G03795.1|Symbols:|Exostosin family protein
Glyma.10G128900	1.79499	3.95493e-19	NA	NA
Glyma.17G141700	1.76868	9.10064e-05	Pectinesterase	AT5G47500.1|Symbols:|Pectin lyase-like superfamily protein
Glyma.03G025200	1.76459	7.33454e-14	NA	NA
Glyma.19G006000	1.75718	8.47404e-05	WW domain; Helicase conserved C-terminal domain; DEAD/DEAH box helicase	AT5G14610.2|Symbols:|DEAD box RNA helicase family protein
Glyma.12G060900	1.7564	0.000458256	Multicopper oxidase; Multicopper oxidase; Multicopper oxidase	AT2G29130.1|Symbols:LAC2, ATLAC2|laccase 2
Glyma.13G364400	1.74759	0.00402376	Nodulin	NA
Glyma.14G195000	1.74509	1.3729e-180	Asparagine synthase	AT3G47340.1|Symbols:ASN1, DIN6, AT-ASN1|glutamine-dependent asparagine synthase 1
Glyma.16G161100	1.72302	2.68293e-05	Plant protein of unknown function	AT4G31980.1|Symbols:|unknown protein
Glyma.01G078300	1.6863	8.415e-21	Cytochrome P450	AT4G31500.1|Symbols:CYP83B1, SUR2, RNT1, RED1, ATR4|cytochrome P450, family 83, subfamily B, polypeptide 1
Glyma.15G044700	1.66906	0.000283171	V-type ATPase 116kDa subunit family	AT2G28520.1|Symbols:VHA-A1|vacuolar proton ATPase A1
Glyma.02G052000	1.65708	0.00158764	Putative S-adenosyl-L-methionine-dependent methyltransferase	AT3G51070.1|Symbols:|S-adenosyl-L-methionine-dependent methyltransferases superfamily protein
Glyma.08G108000	1.65589	3.71489e-22	56kDa selenium binding protein (SBP56)	AT4G14040.1|Symbols:EDA38, SBP2|selenium-binding protein 2
Glyma.08G169100	1.65382	0.000453102	2OG-Fe(II) oxygenase superfamily	AT3G12900.1|Symbols:|2-oxoglutarate (2OG) and Fe(II)-dependent oxygenase superfamily protein
Glyma.02G064300	1.64341	1.02321e-66	Ribonuclease T2 family	AT2G02990.1|Symbols:RNS1, ATRNS1|ribonuclease 1
Glyma.20G191200	1.6404	2.19093e-09	Globin	AT3G10520.1|Symbols:AHB2, GLB2, ARATH GLB2, NSHB2, ATGLB2, HB2|haemoglobin 2
Glyma.18G106900	1.63717	0.000112951	RNA recognition motif 2; RNA recognition motif. (a.k.a. RRM, RBD, or RNP domain)	AT1G29400.2|Symbols:AML5, ML5|MEI2-like protein 5
Glyma.18G017800	1.6204	9.94798e-05	VQ motif	AT5G65170.1|Symbols:|VQ motif-containing protein
Glyma.03G044900	1.61567	7.78398e-11	Dirigent-like protein	AT5G49040.1|Symbols:|Disease resistance-responsive (dirigent-like protein) family protein
Glyma.09G022800	1.61563	1.02543e-91	Peroxidase	AT5G06730.1|Symbols:|Peroxidase superfamily protein
Glyma.17G017400	1.61424	1.60504e-06	IPP transferase	AT5G19040.1|Symbols:ATIPT5, IPT5|isopentenyltransferase 5
Glyma.16G043300	1.61149	3.44319e-13	GDA1/CD39 (nucleoside phosphatase) family	AT5G18280.1|Symbols:ATAPY2, APY2|apyrase 2
Glyma.20G117800	1.59904	0.0064732	NA	AT1G68360.1|Symbols:|C2H2 and C2HC zinc fingers superfamily protein
Glyma.02G005800	1.58217	7.02247e-11	Sugar (and other) transporter	AT3G54700.1|Symbols:PHT1;7|phosphate transporter 1;7
Glyma.01G130200	1.56248	1.29299e-07	Protease inhibitor/seed storage/LTP family	AT2G38530.1|Symbols:LTP2, LP2, cdf3|lipid transfer protein 2
Glyma.19G251500	1.55426	0.000142513	Peptidase inhibitor I9; Subtilase family; PA domain	AT5G67360.1|Symbols:ARA12|Subtilase family protein
Glyma.01G001500	1.55286	7.73461e-06	Prenyltransferase and squalene oxidase repeat	AT2G07050.1|Symbols:CAS1|cycloartenol synthase 1
Glyma.07G086200	1.55101	4.77681e-06	Flavin-binding monooxygenase-like	AT4G13260.1|Symbols:YUC2|Flavin-binding monooxygenase family protein
Glyma.03G200200	1.55019	5.8097e-05	Transcriptional repressor, ovate	AT2G36026.1|Symbols:|Ovate family protein
Glyma.14G194900	1.54693	1.61829e-11	PF03005	AT5G58600.1|Symbols:PMR5, TBL44|Plant protein of unknown function (DUF828)
Glyma.13G177600	1.54688	0.000406853	Dof domain, zinc finger	AT1G51700.1|Symbols:ADOF1, DOF1|DOF zinc finger protein 1
Glyma.03G034900	1.54187	8.3646e-07	NB-ARC domain; Leucine Rich Repeat	AT3G14470.1|Symbols:|NB-ARC domain-containing disease resistance protein
Glyma.06G050900	1.53015	1.87992e-28	Protein phosphatase 2C	AT5G36250.1|Symbols:|Protein phosphatase 2C family protein
Glyma.05G220500	1.52917	2.43028e-25	Cytochrome P450	AT5G36110.1|Symbols:CYP716A1|cytochrome P450, family 716, subfamily A, polypeptide 1
Glyma.03G130600	1.52493	0.00381742	Helix-loop-helix DNA-binding domain	AT3G56970.1|Symbols:BHLH038, ORG2|basic helix-loop-helix (bHLH) DNA-binding superfamily protein
Glyma.13G202500	1.5198	1.71357e-12	Cellulose synthase	AT5G05170.1|Symbols:CESA3, IXR1, ATCESA3, ATH-B, CEV1|Cellulose synthase family protein
Glyma.15G082200	1.50755	2.08519e-18	Papain family cysteine protease; Cathepsin propeptide inhibitor domain (I29)	AT1G09850.1|Symbols:XBCP3|xylem bark cysteine peptidase 3
Glyma.17G202900	1.50647	8.65096e-11	X8 domain; Glycosyl hydrolases family 17	AT3G13560.2|Symbols:|O-Glycosyl hydrolases family 17 protein
Glyma.13G300600	1.50013	5.15192e-05	Family of unknown function (DUF566)	AT2G20815.2|Symbols:QWRF3|Family of unknown function (DUF566) _x0001_
Glyma.13G345700	1.49073	7.75512e-08	GRAS domain family	AT4G37650.1|Symbols:SHR, SGR7|GRAS family transcription factor
Glyma.02G064100	1.48975	4.71452e-79	Ribonuclease T2 family	AT2G02990.1|Symbols:RNS1, ATRNS1|ribonuclease 1
Glyma.13G067700	1.4871	0.00045347	Vitamin-D-receptor interacting Mediator subunit 4	AT5G02850.1|Symbols:|hydroxyproline-rich glycoprotein family protein
Glyma.11G182900	1.48537	0.00948003	RNA recognition motif. (a.k.a. RRM, RBD, or RNP domain)	AT4G00830.2|Symbols:|RNA-binding (RRM/RBD/RNP motifs) family protein
Glyma.12G116200	1.48493	0.00305132	Leucine Rich Repeat	AT4G28380.1|Symbols:|Leucine-rich repeat (LRR) family protein
Glyma.06G059500	1.48483	0.00760332	NA	AT5G57685.1|Symbols:ATGDU3, GDU3, LSB1|glutamine dumper 3
Glyma.18G056400	1.48368	5.6885e-12	Wound-induced protein WI12	AT3G10985.1|Symbols:SAG20, WI12, ATWI-12|senescence associated gene 20
Glyma.13G168500	1.4713	3.08044e-43	Domain of unknown function (DUF588)	AT5G40300.1|Symbols:|Uncharacterised protein family (UPF0497)
Glyma.13G348500	1.47064	0.000126704	NA	AT5G57010.1|Symbols:|calmodulin-binding family protein
Glyma.10G121000	1.46839	0.00437919	NA	AT3G18280.1|Symbols:|Bifunctional inhibitor/lipid-transfer protein/seed storage 2S albumin superfamily protein
Glyma.10G167800	1.4554	2.2212e-11	Ammonium Transporter Family	AT1G64780.1|Symbols:ATAMT1;2, AMT1;2|ammonium transporter 1;2
Glyma.13G164400	1.45448	1.60384e-05	NA	NA
Glyma.03G104500	1.45247	0.00868124	UDP-glucoronosyl and UDP-glucosyl transferase	AT4G01070.1|Symbols:GT72B1, UGT72B1|UDP-Glycosyltransferase superfamily protein
Glyma.14G052300	1.45197	3.82298e-08	NA	NA
Glyma.10G140200	1.44548	4.79901e-05	Rare lipoprotein A (RlpA)-like double-psi beta-barrel; Pollen allergen	AT4G01630.1|Symbols:ATEXPA17, ATEXP17, ATHEXP ALPHA 1.13, EXPA17|expansin A17
Glyma.19G114600	1.43973	1.10806e-06	Ankyrin repeat; MSP (Major sperm protein) domain	AT5G13530.2|Symbols:KEG|protein kinases;ubiquitin-protein ligases
Glyma.18G191400	1.43959	0.00126233	Trypsin and protease inhibitor	AT1G73260.1|Symbols:ATKTI1, KTI1|kunitz trypsin inhibitor 1
Glyma.02G265200	1.43706	0.000708555	NA	NA
Glyma.17G045600	1.43618	0.00832366	Kinesin motor domain; Domain of unknown function (DUF3490)	AT3G43210.1|Symbols:TES, ATNACK2, NACK2|ATP binding microtubule motor family protein
Glyma.06G311100	1.43342	3.92515e-06	NB-ARC domain	AT3G07040.1|Symbols:RPM1, RPS3|NB-ARC domain-containing disease resistance protein
Glyma.19G165300	1.42372	0.0010027	Protein of unknown function (DUF640)	AT2G31160.1|Symbols:LSH3|Protein of unknown function (DUF640)
Glyma.01G219100	1.42118	3.47401e-44	E1-E2 ATPase; Heavy-metal-associated domain; haloacid dehalogenase-like hydrolase	AT1G63440.1|Symbols:HMA5|heavy metal atpase 5
Glyma.20G100900	1.41955	1.50783e-07	Eukaryotic aspartyl protease	AT3G20015.1|Symbols:|Eukaryotic aspartyl protease family protein
Glyma.15G110200	1.41781	3.37759e-19	Eukaryotic aspartyl protease; Saposin-like type B, region 2; Saposin-like type B, region 1	AT1G11910.1|Symbols:APA1, ATAPA1|aspartic proteinase A1
Glyma.15G170300	1.41455	1.92392e-05	FAD binding domain ; Cytokinin dehydrogenase 1, FAD and cytokinin binding	AT5G56970.1|Symbols:CKX3, ATCKX3|cytokinin oxidase 3
Glyma.06G302700	1.41136	6.48098e-21	Peroxidase	AT1G05260.1|Symbols:RCI3, RCI3A|Peroxidase superfamily protein
Glyma.10G006700	1.40777	2.1154e-59	Sugar (and other) transporter	AT3G54700.1|Symbols:PHT1;7|phosphate transporter 1;7
Glyma.12G063900	1.40038	0.000372541	Homeobox domain	AT5G59340.1|Symbols:WOX2|WUSCHEL related homeobox 2
Glyma.20G195100	1.39739	0.00310384	NA	AT5G10030.2|Symbols:TGA4|TGACG motif-binding factor 4
Glyma.10G029100	1.39385	2.78628e-05	NA	AT3G63290.1|Symbols:|2-oxoglutarate (2OG) and Fe(II)-dependent oxygenase superfamily protein
Glyma.18G274500	1.39064	9.82593e-05	F-box domain	AT3G23880.1|Symbols:|F-box and associated interaction domains-containing protein
Glyma.09G286500	1.3888	0.00625015	Ribonucleases P/MRP protein subunit POP1	AT2G47300.2|Symbols:|ribonuclease Ps
Glyma.15G043300	1.38638	4.55987e-09	Glycosyl hydrolases family 18	NA
Glyma.13G194100	1.38463	1.0877e-06	Leucine Rich Repeat; NB-ARC domain	AT3G14470.1|Symbols:|NB-ARC domain-containing disease resistance protein
Glyma.03G185500	1.3834	0.00100044	Eukaryotic-type carbonic anhydrase	AT1G08080.1|Symbols:ATACA7, ACA7|alpha carbonic anhydrase 7
Glyma.09G129700	1.37407	0.00928958	Domain of unknown function DUF21	AT5G52790.1|Symbols:|CBS domain-containing protein with a domain of unknown function (DUF21)
Glyma.09G117900	1.37144	4.93038e-09	Membrane transport protein	AT1G70940.1|Symbols:PIN3, ATPIN3|Auxin efflux carrier family protein
Glyma.10G126100	1.36926	3.18435e-08	NA	NA
Glyma.03G030500	1.36399	2.09619e-17	Glycosyl hydrolases family 18	NA
Glyma.18G101700	1.35965	0.00121158	NA	AT5G54850.1|Symbols:|unknown protein
Glyma.06G303300	1.35674	0.00191998	Late embryogenesis abundant protein	AT3G54200.1|Symbols:|Late embryogenesis abundant (LEA) hydroxyproline-rich glycoprotein family
Glyma.08G321200	1.35496	8.46996e-21	Eukaryotic aspartyl protease	AT5G10770.1|Symbols:|Eukaryotic aspartyl protease family protein
Glyma.15G055900	1.35471	0.0098122	NA	AT5G64310.1|Symbols:AGP1, ATAGP1|arabinogalactan protein 1
Glyma.11G074700	1.35141	1.40799e-48	Transferase family	AT1G24430.1|Symbols:|HXXXD-type acyl-transferase family protein
Glyma.08G102100	1.34733	6.45639e-10	short chain dehydrogenase	AT1G24360.1|Symbols:|NAD(P)-binding Rossmann-fold superfamily protein
Glyma.13G037400	1.34353	0.00226852	Protein of unknown function (DUF791)	AT3G49310.1|Symbols:|Major facilitator superfamily protein
Glyma.11G224600	1.34335	3.54567e-20	Peptidase inhibitor I9; Subtilase family; PA domain	AT5G59120.1|Symbols:ATSBT4.13, SBT4.13|subtilase 4.13
Glyma.16G137300	1.33699	0.00566087	TIR domain; NB-ARC domain	AT5G17680.1|Symbols:|disease resistance protein (TIR-NBS-LRR class), putative
Glyma.02G121400	1.33361	0.00404846	NA	AT1G69160.1|Symbols:|unknown protein
Glyma.15G140200	1.33232	2.46377e-11	CoA-ligase; Citrate synthase	AT3G06650.1|Symbols:ACLB-1|ATP-citrate lyase B-1
Glyma.01G165600	1.32257	6.96117e-14	Thaumatin family	AT4G36010.2|Symbols:|Pathogenesis-related thaumatin superfamily protein
Glyma.10G266500	1.3204	6.21927e-08	Plant protein of unknown function	AT3G50150.1|Symbols:|Plant protein of unknown function (DUF247)
Glyma.10G198800	1.30801	0.00282941	Globin	AT3G10520.1|Symbols:AHB2, GLB2, ARATH GLB2, NSHB2, ATGLB2, HB2|haemoglobin 2
Glyma.04G018900	1.30723	2.19141e-05	Protein of unknown function (DUF632); Protein of unknown function (DUF630)	AT1G20530.1|Symbols:|Protein of unknown function (DUF630 and DUF632)
Glyma.01G209500	1.30486	8.69306e-06	Pectinesterase	AT5G47500.1|Symbols:|Pectin lyase-like superfamily protein
Glyma.11G163100	1.30283	8.51564e-15	Wound-induced protein WI12	AT3G10985.1|Symbols:SAG20, WI12, ATWI-12|senescence associated gene 20
Glyma.14G130000	1.29988	2.35283e-20	Sulfate transporter family	AT2G25680.1|Symbols:MOT1|molybdate transporter 1
Glyma.11G171200	1.29744	8.13384e-05	Agenet domain; PHD-finger	AT5G58610.1|Symbols:|PHD finger transcription factor, putative
Glyma.05G051500	1.29679	0.0099727	PA domain; Peptidase inhibitor I9; Subtilase family	AT1G04110.1|Symbols:SDD1|Subtilase family protein
Glyma.20G033700	1.29402	0.00883458	Domain of unknown function (DUF588)	AT5G15290.1|Symbols:|Uncharacterised protein family (UPF0497)
Glyma.13G194800	1.29392	3.01104e-08	TIR domain; NB-ARC domain	AT5G41750.2|Symbols:|Disease resistance protein (TIR-NBS-LRR class) family
Glyma.13G252600	1.29306	1.69255e-20	Cysteine-rich secretory protein family	AT2G19990.1|Symbols:PR-1-LIKE|pathogenesis-related protein-1-like
Glyma.03G111400	1.29081	0.00726184	Cellulose synthase	AT5G19820.1|Symbols:emb2734|ARM repeat superfamily protein
Glyma.06G153800	1.28682	0.000886388	Cupin	AT5G61750.1|Symbols:|RmlC-like cupins superfamily protein
Glyma.17G133500	1.28464	0.00111915	PA domain; Peptidase inhibitor I9; Subtilase family	AT1G04110.1|Symbols:SDD1|Subtilase family protein
Glyma.04G247800	1.28373	0.000526486	Response regulator receiver domain	AT3G57040.1|Symbols:ARR9, ATRR4|response regulator 9
Glyma.20G192700	1.28266	1.04344e-16	Prenyltransferase and squalene oxidase repeat	AT2G07050.1|Symbols:CAS1|cycloartenol synthase 1
Glyma.03G057500	1.28079	2.86698e-09	DnaJ domain; DnaJ C terminal domain	AT3G08910.1|Symbols:|DNAJ heat shock family protein
Glyma.16G046300	1.28046	0.00540723	AP2 domain	AT5G13910.1|Symbols:LEP|Integrase-type DNA-binding superfamily protein
Glyma.12G080300	1.28035	5.94613e-08	Exostosin family	AT2G28110.1|Symbols:FRA8, IRX7|Exostosin family protein
Glyma.12G111500	1.2742	0.00019394	NA	AT1G03670.1|Symbols:|ankyrin repeat family protein
Glyma.10G272300	1.26818	3.26595e-06	NA	AT1G68360.1|Symbols:|C2H2 and C2HC zinc fingers superfamily protein
Glyma.17G158900	1.26731	1.43867e-11	bZIP transcription factor	AT3G49760.1|Symbols:AtbZIP5, bZIP5|basic leucine-zipper 5
Glyma.17G153000	1.26389	7.5356e-13	Endonuclease/Exonuclease/phosphatase family	AT4G18010.2|Symbols:IP5PII|myo-inositol polyphosphate 5-phosphatase 2
Glyma.01G037100	1.26014	3.40066e-12	Putative peptidoglycan binding domain; Matrixin	AT1G59970.1|Symbols:|Matrixin family protein
Glyma.07G017300	1.25902	2.66669e-06	AP2 domain	AT5G11590.1|Symbols:TINY2|Integrase-type DNA-binding superfamily protein
Glyma.14G064200	1.2581	5.88203e-09	Subtilase family; Peptidase inhibitor I9; PA domain	AT5G59100.1|Symbols:|Subtilisin-like serine endopeptidase family protein
Glyma.02G028500	1.25749	0.00362098	Matrixin	AT1G70170.1|Symbols:MMP|matrix metalloproteinase
Glyma.02G132700	1.25694	0.0020211	VID27 cytoplasmic protein	AT3G19240.1|Symbols:|Vacuolar import/degradation, Vid27-related protein
Glyma.05G088400	1.25307	0.00100172	Ankyrin repeat; MSP (Major sperm protein) domain	AT5G13530.2|Symbols:KEG|protein kinases;ubiquitin-protein ligases
Glyma.19G258700	1.25204	1.01405e-09	Cytochrome P450	AT2G46660.1|Symbols:CYP78A6|cytochrome P450, family 78, subfamily A, polypeptide 6
Glyma.19G261300	1.25183	0.000898118	B3 DNA binding domain	AT2G46870.1|Symbols:NGA1|AP2/B3-like transcriptional factor family protein
Glyma.01G174400	1.25115	1.03327e-05	Sugar (and other) transporter	AT4G36670.1|Symbols:|Major facilitator superfamily protein
Glyma.09G188700	1.2494	2.42806e-06	STAS domain; Sulfate transporter family	AT5G19600.1|Symbols:SULTR3;5|sulfate transporter 3;5
Glyma.10G122300	1.24379	1.0722e-05	Pollen allergen; Rare lipoprotein A (RlpA)-like double-psi beta-barrel	AT1G65680.1|Symbols:ATEXPB2, EXPB2, ATHEXP BETA 1.4|expansin B2
Glyma.10G168100	1.24204	0.000180608	Ammonium Transporter Family	AT1G64780.1|Symbols:ATAMT1;2, AMT1;2|ammonium transporter 1;2
Glyma.01G050100	1.23437	4.35304e-05	Pollen allergen; Rare lipoprotein A (RlpA)-like double-psi beta-barrel	AT1G69530.2|Symbols:ATEXPA1, EXP1, AT-EXP1, ATEXP1, ATHEXP ALPHA 1.2, EXPA1|expansin A1
Glyma.20G144300	1.23133	0.00796276	Sugar (and other) transporter	AT5G26340.1|Symbols:MSS1, STP13, ATSTP13|Major facilitator superfamily protein
Glyma.19G178200	1.2298	1.31106e-14	AP2 domain	AT2G28550.3|Symbols:RAP2.7|related to AP2.7
Glyma.10G206800	1.22638	1.18599e-07	NA	NA
Glyma.17G208200	1.22198	0.00590838	Protein of unknown function (DUF642)	AT5G11420.1|Symbols:|Protein of unknown function, DUF642
Glyma.03G024200	1.21788	1.18228e-84	Glycosyl hydrolases family 18	NA
Glyma.11G169800	1.21633	0.0014752	NA	AT1G07120.1|Symbols:|Tetratricopeptide repeat (TPR)-like superfamily protein (TAIR:AT4G18570.1)
Glyma.18G207900	1.21579	0.000160942	CRAL/TRIO, N-terminal domain; CRAL/TRIO domain	AT3G51670.1|Symbols:|SEC14 cytosolic factor family protein / phosphoglyceride transfer family protein
Glyma.13G168700	1.21344	4.18626e-09	D-isomer specific 2-hydroxyacid dehydrogenase, catalytic domain; D-isomer specific 2-hydroxyacid dehydrogenase, NAD binding domain	AT5G14780.1|Symbols:FDH|formate dehydrogenase
Glyma.03G184500	1.20811	5.94251e-30	Xyloglucan endo-transglycosylase (XET) C-terminus; Glycosyl hydrolases family 16	AT2G36870.1|Symbols:XTH32|xyloglucan endotransglucosylase/hydrolase 32
Glyma.15G181600	1.20451	0.000655865	Plant invertase/pectin methylesterase inhibitor	AT5G20740.1|Symbols:|Plant invertase/pectin methylesterase inhibitor superfamily protein
Glyma.11G244800	1.19931	1.51913e-06	Pectate lyase	AT1G67750.1|Symbols:|Pectate lyase family protein
Glyma.07G142400	1.19823	2.06838e-06	Multicopper oxidase; Multicopper oxidase; Multicopper oxidase	AT3G09220.1|Symbols:LAC7|laccase 7
Glyma.02G144400	1.19668	0.00545067	Zinc-finger double-stranded RNA-binding	AT4G02670.1|Symbols:AtIDD12, IDD12|indeterminate(ID)-domain 12
Glyma.02G028100	1.19016	3.20497e-06	Putative peptidoglycan binding domain; Matrixin	AT1G59970.1|Symbols:|Matrixin family protein
Glyma.04G027400	1.18833	1.71142e-10	Domain of unknown function (DUF702)	AT1G75520.1|Symbols:SRS5|SHI-related sequence 5
Glyma.04G136700	1.18328	1.48334e-05	Domain of unknown function (DUF702)	AT5G12330.1|Symbols:LRP1|Lateral root primordium (LRP) protein-related
Glyma.10G051800	1.18185	0.000394408	Zinc finger, C3HC4 type (RING finger)	AT3G09760.1|Symbols:|RING/U-box superfamily protein
Glyma.05G043900	1.17916	9.56592e-07	BTB/POZ domain	AT3G48360.1|Symbols:BT2, ATBT2|BTB and TAZ domain protein 2
Glyma.06G003200	1.17663	1.13907e-06	Major intrinsic protein	AT2G16850.1|Symbols:PIP3B, PIP2;8|plasma membrane intrinsic protein 2;8
Glyma.12G027100	1.17161	1.79958e-06	TIR domain; Leucine Rich Repeat; NB-ARC domain	AT5G17680.1|Symbols:|disease resistance protein (TIR-NBS-LRR class), putative
Glyma.07G134500	1.17142	1.51445e-05	NA	AT5G02160.1|Symbols:|unknown protein
Glyma.17G139900	1.17133	9.03238e-51	Protease inhibitor/seed storage/LTP family	AT4G12510.1|Symbols:|Bifunctional inhibitor/lipid-transfer protein/seed storage 2S albumin superfamily protein
Glyma.09G190700	1.16974	0.00529298	Flavin-binding monooxygenase-like	AT4G13260.1|Symbols:YUC2|Flavin-binding monooxygenase family protein
Glyma.10G000300	1.16757	2.31825e-11	Transferase family	AT5G17540.1|Symbols:|HXXXD-type acyl-transferase family protein
Glyma.17G161700	1.16695	0.000194505	Acetyltransferase (GNAT) family	AT2G23060.1|Symbols:|Acyl-CoA N-acyltransferases (NAT) superfamily protein
Glyma.08G169300	1.16636	0.00126376	2OG-Fe(II) oxygenase superfamily	AT3G12900.1|Symbols:|2-oxoglutarate (2OG) and Fe(II)-dependent oxygenase superfamily protein
Glyma.13G190400	1.16536	0.00235696	NB-ARC domain	AT3G14470.1|Symbols:|NB-ARC domain-containing disease resistance protein
Glyma.13G200400	1.16526	7.68364e-11	Flavin-binding monooxygenase-like	AT1G62620.1|Symbols:|Flavin-binding monooxygenase family protein
Glyma.09G102400	1.16428	6.19507e-05	Pathogenesis-related protein Bet v I family	AT1G70850.2|Symbols:MLP34|MLP-like protein 34
Glyma.15G217100	1.16324	8.12748e-32	Pathogenesis-related protein Bet v I family	AT1G70890.1|Symbols:MLP43|MLP-like protein 43
Glyma.08G196900	1.16259	6.03762e-07	Peptidase dimerisation domain; Peptidase family M20/M25/M40	AT1G51760.1|Symbols:IAR3, JR3|peptidase M20/M25/M40 family protein
Glyma.11G032700	1.1598	0.00656332	Pectinesterase	AT5G47500.1|Symbols:|Pectin lyase-like superfamily protein
Glyma.20G067300	1.15909	6.20997e-08	OPT oligopeptide transporter protein	AT4G10770.1|Symbols:ATOPT7, OPT7|oligopeptide transporter 7
Glyma.16G069500	1.15565	3.29702e-34	Tubby C 2	AT5G01750.2|Symbols:|Protein of unknown function (DUF567)
Glyma.15G260600	1.15563	5.47355e-05	Eukaryotic aspartyl protease	AT2G35615.1|Symbols:|Eukaryotic aspartyl protease family protein
Glyma.12G228300	1.14882	0.000213589	TCP family transcription factor	AT1G53230.1|Symbols:TCP3|TEOSINTE BRANCHED 1, cycloidea and PCF transcription factor 3
Glyma.10G283000	1.14867	0.000712447	Protein of unknown function (DUF630); Protein of unknown function (DUF632)	AT4G30130.1|Symbols:|Protein of unknown function (DUF630 and DUF632)
Glyma.18G049500	1.14473	3.43237e-05	Cytochrome P450	AT5G24910.1|Symbols:CYP714A1|cytochrome P450, family 714, subfamily A, polypeptide 1
Glyma.14G087200	1.14043	0.00023489	Gibberellin regulated protein	AT5G59845.1|Symbols:|Gibberellin-regulated family protein
Glyma.06G269700	1.13939	6.08129e-06	Thi4 family	AT5G54770.1|Symbols:THI1, TZ, THI4|thiazole biosynthetic enzyme, chloroplast (ARA6) (THI1) (THI4)
Glyma.17G015400	1.13805	0.00575418	Cytochrome P450	AT1G11600.1|Symbols:CYP77B1|cytochrome P450, family 77, subfamily B, polypeptide 1
Glyma.14G193100	1.13665	0.0075048	Putative undecaprenyl diphosphate synthase	AT5G58770.1|Symbols:|Undecaprenyl pyrophosphate synthetase family protein
Glyma.05G103200	1.13466	0.000119378	Subtilase family; Peptidase inhibitor I9; PA domain	AT5G67360.1|Symbols:ARA12|Subtilase family protein
Glyma.01G012800	1.13251	0.000544761	Lipase (class 3)	AT4G16070.1|Symbols:|Mono-/di-acylglycerol lipase, N-terminal;Lipase, class 3
Glyma.01G200100	1.13225	1.81611e-26	POT family	AT1G32450.1|Symbols:NRT1.5|nitrate transporter 1.5
Glyma.02G159900	1.12932	1.96746e-11	ABC-2 type transporter; ABC transporter; Plant PDR ABC transporter associated	AT1G66950.1|Symbols:PDR11, ATPDR11|pleiotropic drug resistance 11
Glyma.16G150300	1.12789	4.82004e-11	Xyloglucan endo-transglycosylase (XET) C-terminus; Glycosyl hydrolases family 16	AT5G13870.1|Symbols:EXGT-A4, XTH5|xyloglucan endotransglucosylase/hydrolase 5
Glyma.05G058400	1.12081	0.00139697	NA	AT4G17250.1|Symbols:|unknown protein
Glyma.06G302600	1.1167	3.4613e-54	Peroxidase	AT1G05260.1|Symbols:RCI3, RCI3A|Peroxidase superfamily protein
Glyma.03G024300	1.11531	1.24948e-51	Glycosyl hydrolases family 18	NA
Glyma.02G092600	1.10832	0.00169756	Domain of unknown function (DUF588)	AT2G39530.1|Symbols:|Uncharacterised protein family (UPF0497)
Glyma.06G119200	1.10773	0.000395929	Calcium-binding EGF domain; Protein kinase domain	AT1G21270.1|Symbols:WAK2|wall-associated kinase 2
Glyma.09G098400	1.10687	0.000884524	TAZ zinc finger	AT5G63160.1|Symbols:BT1|BTB and TAZ domain protein 1
Glyma.18G215600	1.10655	1.81573e-15	Cellulase (glycosyl hydrolase family 5)	AT5G01930.1|Symbols:MAN6, AtMAN6|Glycosyl hydrolase superfamily protein
Glyma.05G070400	1.10595	1.16653e-06	Endonuclease/Exonuclease/phosphatase family	AT4G18010.2|Symbols:IP5PII|myo-inositol polyphosphate 5-phosphatase 2
Glyma.04G188100	1.10304	6.72526e-08	UDP-glucoronosyl and UDP-glucosyl transferase	AT2G30140.1|Symbols:|UDP-Glycosyltransferase superfamily protein
Glyma.03G024400	1.09826	1.12866e-79	Glycosyl hydrolases family 18	NA
Glyma.10G288100	1.09616	9.87309e-06	Eukaryotic aspartyl protease	AT3G20015.1|Symbols:|Eukaryotic aspartyl protease family protein
Glyma.05G051400	1.09424	2.77417e-07	Peptidase inhibitor I9; Subtilase family; PA domain	AT1G04110.1|Symbols:SDD1|Subtilase family protein
Glyma.07G010900	1.09138	3.65748e-05	Phospholipase D C terminal	AT1G55180.1|Symbols:PLDEPSILON, PLDALPHA4|phospholipase D alpha 4
Glyma.13G178700	1.08956	1.16977e-13	Pollen proteins Ole e I like	AT2G34700.1|Symbols:|Pollen Ole e 1 allergen and extensin family protein
Glyma.06G042500	1.0891	0.00486312	Leucine Rich Repeat; Protein kinase domain	AT5G43020.1|Symbols:|Leucine-rich repeat protein kinase family protein
Glyma.13G110800	1.08837	3.36161e-06	Subtilase family; PA domain; Peptidase inhibitor I9	AT2G05920.1|Symbols:|Subtilase family protein
Glyma.18G210900	1.08809	1.28558e-07	Protease inhibitor/seed storage/LTP family	AT2G38540.1|Symbols:LP1, LTP1, ATLTP1|lipid transfer protein 1
Glyma.18G216200	1.08727	9.44951e-11	Protein kinase domain; Leucine Rich Repeat; Leucine rich repeat N-terminal domain	AT5G58300.2|Symbols:|Leucine-rich repeat protein kinase family protein
Glyma.05G228400	1.08443	1.39755e-07	Sugar (and other) transporter	AT1G77210.2|Symbols:STP14|sugar transporter 14
Glyma.08G169800	1.08305	7.82898e-19	Kelch motif	AT3G07720.1|Symbols:|Galactose oxidase/kelch repeat superfamily protein
Glyma.08G321500	1.08267	4.69669e-08	Eukaryotic aspartyl protease	AT5G10770.1|Symbols:|Eukaryotic aspartyl protease family protein
Glyma.18G257800	1.08244	0.000194729	Protein kinase domain; Leucine Rich Repeat	AT1G17230.1|Symbols:|Leucine-rich receptor-like protein kinase family protein
Glyma.17G133400	1.08212	1.51731e-07	Peptidase inhibitor I9; PA domain; Subtilase family	AT1G04110.1|Symbols:SDD1|Subtilase family protein
Glyma.05G187900	1.07946	3.65573e-10	EamA-like transporter family	AT5G64700.1|Symbols:|nodulin MtN21 /EamA-like transporter family protein
Glyma.01G061100	1.07915	9.37863e-06	Cytochrome P450	AT1G13710.1|Symbols:CYP78A5, KLU|cytochrome P450, family 78, subfamily A, polypeptide 5
Glyma.06G283300	1.07703	6.13556e-06	Helix-loop-helix DNA-binding domain	AT1G68810.1|Symbols:|basic helix-loop-helix (bHLH) DNA-binding superfamily protein
Glyma.04G112800	1.07575	0.00314193	Photosystem I psaG / psaK	AT1G55670.1|Symbols:PSAG|photosystem I subunit G
Glyma.20G110000	1.07472	5.45629e-07	PF03005	AT3G54260.1|Symbols:TBL36|TRICHOME BIREFRINGENCE-LIKE 36
Glyma.13G213500	1.07335	0.00530048	Transketolase, pyrimidine binding domain; Dehydrogenase E1 component; Transketolase, C-terminal domain	AT4G15560.1|Symbols:CLA1, DEF, CLA, DXS, DXPS2|Deoxyxylulose-5-phosphate synthase
Glyma.18G133100	1.07246	0.00537127	Cyclin, N-terminal domain; Cyclin, C-terminal domain	AT1G70210.1|Symbols:CYCD1;1, ATCYCD1;1|CYCLIN D1;1
Glyma.05G044000	1.07244	1.95105e-11	Pectate lyase	AT5G63180.1|Symbols:|Pectin lyase-like superfamily protein
Glyma.07G249000	1.07064	1.40857e-06	Histone-like transcription factor (CBF/NF-Y) and archaeal histone	AT2G47810.1|Symbols:NF-YB5|nuclear factor Y, subunit B5
Glyma.03G157000	1.07014	9.72273e-07	Auxin canalisation; Plant pleckstrin homology-like region	AT3G22810.1|Symbols:|Plant protein of unknown function (DUF828) with plant pleckstrin homology-like region
Glyma.14G055200	1.06816	0.00157941	NA	AT4G14270.1|Symbols:|Protein containing PAM2 motif which mediates interaction with the PABC domain of polyadenyl binding proteins.
Glyma.09G205400	1.06725	3.89385e-08	Tetraspanin family	AT5G46700.1|Symbols:TET1, TRN2|Tetraspanin family protein
Glyma.08G162400	1.06717	5.29986e-14	Eukaryotic aspartyl protease	AT2G35615.1|Symbols:|Eukaryotic aspartyl protease family protein
Glyma.16G164300	1.06552	7.08108e-05	Peroxidase	AT1G71695.1|Symbols:|Peroxidase superfamily protein
Glyma.18G289800	1.06027	7.64405e-10	Domain of unknown function (DUF588)	AT2G39518.1|Symbols:|Uncharacterised protein family (UPF0497)
Glyma.02G204500	1.05963	0.000197019	Plastocyanin-like domain	AT5G57920.1|Symbols:ENODL10, AtENODL10|early nodulin-like protein 10
Glyma.01G081600	1.05638	3.38295e-07	POT family	AT1G68570.1|Symbols:|Major facilitator superfamily protein
Glyma.06G184400	1.05629	1.50942e-05	Leucine Rich Repeat; Protein kinase domain	AT2G26730.1|Symbols:|Leucine-rich repeat protein kinase family protein
Glyma.07G067700	1.05548	0.000396532	FAD-binding domain; Ferric reductase like transmembrane component; Ferric reductase NAD binding domain	AT1G01580.1|Symbols:FRO2, FRD1, ATFRO2|ferric reduction oxidase 2
Glyma.13G191200	1.05212	1.60504e-06	Annexin	AT5G12380.1|Symbols:ANNAT8|annexin 8
Glyma.10G185600	1.05146	1.92392e-05	NA	AT3G01680.1|Symbols:|unknown protein
Glyma.03G205900	1.0504	5.30546e-23	Transferrin receptor-like dimerisation domain; Peptidase family M28	AT3G54720.1|Symbols:AMP1, COP2, HPT, PT, MFO1|Peptidase M28 family protein
Glyma.19G070600	1.04939	0.00784192	Protein kinase domain; Leucine rich repeat N-terminal domain; Leucine Rich Repeat	AT1G68400.1|Symbols:|leucine-rich repeat transmembrane protein kinase family protein
Glyma.18G159700	1.04915	0.00495734	NA	AT3G25130.1|Symbols:|unknown protein
Glyma.02G311000	1.04813	3.0823e-07	RWP-RK domain; PB1 domain	AT4G35270.1|Symbols:|Plant regulator RWP-RK family protein
Glyma.10G168200	1.04804	0.00852102	Ammonium Transporter Family	AT1G64780.1|Symbols:ATAMT1;2, AMT1;2|ammonium transporter 1;2
Glyma.02G090100	1.04679	3.57791e-09	MatE	AT1G71140.1|Symbols:|MATE efflux family protein
Glyma.04G235400	1.04626	2.86087e-05	IQ calmodulin-binding motif	AT3G49260.2|Symbols:iqd21|IQ-domain 21
Glyma.18G141900	1.04533	1.13901e-05	Major Facilitator Superfamily	AT1G12940.1|Symbols:ATNRT2.5, NRT2.5|nitrate transporter2.5
Glyma.09G013800	1.04487	4.9491e-06	Heavy-metal-associated domain	AT5G50740.1|Symbols:|Heavy metal transport/detoxification superfamily protein
Glyma.10G135500	1.04486	0.00385278	NA	AT1G80470.1|Symbols:|F-box/RNI-like/FBD-like domains-containing protein
Glyma.20G008200	1.04236	0.000830381	'Cold-shock' DNA-binding domain; Cytochrome P450	AT3G48310.1|Symbols:CYP71A22|cytochrome P450, family 71, subfamily A, polypeptide 22
Glyma.13G306900	1.04163	1.05947e-37	Peroxidase	AT4G11290.1|Symbols:|Peroxidase superfamily protein
Glyma.07G039100	1.04071	3.72671e-17	Cupin	AT5G20630.1|Symbols:GLP3, GLP3A, GLP3B, ATGER3, GER3|germin 3
Glyma.15G058400	1.03972	9.78887e-11	KH domain	AT5G64390.1|Symbols:HEN4|RNA-binding KH domain-containing protein
Glyma.13G183500	1.03886	3.73085e-55	Common central domain of tyrosinase; Polyphenol oxidase middle domain; Protein of unknown function (DUF B2219)	NA
Glyma.13G183000	1.03757	1.58731e-34	Protein of unknown function (DUF B2219); Common central domain of tyrosinase; Polyphenol oxidase middle domain	NA
Glyma.09G187000	1.03738	1.18776e-11	PLAC8 family	AT1G68630.1|Symbols:|PLAC8 family protein
Glyma.09G014100	1.03701	0.000958003	Histone-like transcription factor (CBF/NF-Y) and archaeal histone	AT4G14540.1|Symbols:NF-YB3|nuclear factor Y, subunit B3
Glyma.03G164000	1.03593	0.00250807	Protein of unknown function (DUF640)	AT2G31160.1|Symbols:LSH3|Protein of unknown function (DUF640)
Glyma.06G269300	1.03522	0.000222663	ABC transporter transmembrane region; ABC transporter	AT3G28345.1|Symbols:|ABC transporter family protein
Glyma.18G008600	1.03513	9.45104e-06	Protein of unknown function (DUF3537)	AT1G67570.1|Symbols:|Protein of unknown function (DUF3537)
Glyma.09G149800	1.03403	1.543e-08	Protein kinase domain	AT1G52540.1|Symbols:|Protein kinase superfamily protein
Glyma.09G179800	1.03347	0.00495994	NA	AT3G20180.1|Symbols:|Copper transport protein family
Glyma.03G132700	1.03237	7.64482e-85	Glycosyl hydrolases family 17	AT3G57270.1|Symbols:BG1|beta-1,3-glucanase 1
Glyma.14G035100	1.03153	0.000277635	NA	AT5G13500.3|Symbols:|unknown protein
Glyma.08G287500	1.03096	0.00141086	BURP domain	AT1G70370.2|Symbols:PG2|polygalacturonase 2
Glyma.05G070600	1.02743	1.34603e-23	POT family	AT1G32450.1|Symbols:NRT1.5|nitrate transporter 1.5
Glyma.14G201100	1.02643	8.00465e-27	O-methyltransferase; Dimerisation domain	AT4G35160.1|Symbols:|O-methyltransferase family protein
Glyma.13G087800	1.02589	3.98788e-10	Histidine phosphatase superfamily (branch 1)	AT1G22170.1|Symbols:|Phosphoglycerate mutase family protein
Glyma.13G372200	1.02502	1.40019e-08	D-isomer specific 2-hydroxyacid dehydrogenase, NAD binding domain; D-isomer specific 2-hydroxyacid dehydrogenase, catalytic domain; ACT domain	AT1G17745.1|Symbols:PGDH|D-3-phosphoglycerate dehydrogenase
Glyma.10G159600	1.02489	7.67754e-08	Transferase family	AT5G17540.1|Symbols:|HXXXD-type acyl-transferase family protein
Glyma.18G018900	1.02267	0.000603391	STAS domain; Sulfate transporter family	AT5G10180.1|Symbols:AST68, SULTR2;1|slufate transporter 2;1
Glyma.14G175100	1.02214	3.02092e-26	UDP-glucoronosyl and UDP-glucosyl transferase	AT1G22380.1|Symbols:AtUGT85A3, UGT85A3|UDP-glucosyl transferase 85A3
Glyma.18G246000	1.02107	0.00820732	Helix-loop-helix DNA-binding domain	AT4G37850.1|Symbols:|basic helix-loop-helix (bHLH) DNA-binding superfamily protein
Glyma.11G022400	1.0205	0.00244549	Zinc finger, C3HC4 type (RING finger)	AT3G61460.1|Symbols:BRH1|brassinosteroid-responsive RING-H2
Glyma.10G060100	1.01824	0.00467257	Amidohydrolase	AT3G53180.1|Symbols:|glutamate-ammonia ligases;catalytics;glutamate-ammonia ligases
Glyma.11G066000	1.01681	0.00670217	Sugar (and other) transporter	AT4G36670.1|Symbols:|Major facilitator superfamily protein
Glyma.18G138000	1.01536	0.00271556	BURP domain	AT1G70370.2|Symbols:PG2|polygalacturonase 2
Glyma.17G088800	1.01152	9.39769e-14	HCO3- transporter family	AT3G62270.1|Symbols:|HCO3- transporter family
Glyma.19G128600	1.01075	0.00575983	HMGL-like	AT2G26800.1|Symbols:|Aldolase superfamily protein
Glyma.09G228000	1.00983	1.83007e-08	Protein of unknown function (DUF642)	AT3G08030.1|Symbols:|Protein of unknown function, DUF642
Glyma.05G042200	1.0093	4.31881e-14	NA	AT5G50200.1|Symbols:WR3, ATNRT3.1, NRT3.1|nitrate transmembrane transporters
Glyma.20G134200	1.0086	5.53956e-09	Carbohydrate binding domain; Glycosyl hydrolase family 10	AT4G33840.1|Symbols:|Glycosyl hydrolase family 10 protein
Glyma.11G170300	1.00575	3.96618e-93	Asparagine synthase	AT3G47340.1|Symbols:ASN1, DIN6, AT-ASN1|glutamine-dependent asparagine synthase 1
Glyma.19G215500	1.00535	1.58991e-11	Glycosyl hydrolase family 3 N terminal domain; Glycosyl hydrolase family 3 C-terminal domain	AT1G02640.1|Symbols:BXL2, ATBXL2|beta-xylosidase 2
Glyma.04G226100	1.00508	0.00204355	Ion channel regulatory protein UNC-93	AT1G18010.1|Symbols:|Major facilitator superfamily protein
Glyma.04G186300	1.00157	1.72688e-07	short chain dehydrogenase	AT5G50130.1|Symbols:|NAD(P)-binding Rossmann-fold superfamily protein
Glyma.09G013100	1.00104	8.87747e-05	Myosin II heavy chain-like	AT4G17220.1|Symbols:ATMAP70-5, MAP70-5|microtubule-associated proteins 70-5
Glyma.15G009800	1.00036	0.000339031	Glycosyl hydrolases family 28	AT1G80170.1|Symbols:|Pectin lyase-like superfamily protein
NA: Not analyzed

## Sheet: Control mutant vs wt root Down
Supplementary Table 1B. Genes whose expression are down-regulated in the roots of the gmsos1-1 when compared to the wild type under normal condition.
Soybean gene ID	log2FoldChange	FDR	Annotation	Arabidopsis homologous genes
Glyma.03G058800	-15.7291	4.59378e-38	NA	NA
Glyma.02G062500	-12.957	1.09735e-23	Aminotransferase class-V	AT2G23520.1|Symbols:|Pyridoxal phosphate (PLP)-dependent transferases superfamily protein
Glyma.15G060600	-11.9696	0.000481359	PB1 domain	AT5G64430.1|Symbols:|Octicosapeptide/Phox/Bem1p family protein
Glyma.06G220600	-10.9892	3.47618e-17	Ubiquitin-binding WIYLD domain	AT1G45248.4|Symbols:|Nucleolar histone methyltransferase-related protein
Glyma.03G029200	-10.9485	2.4408e-17	Pectinesterase; Plant invertase/pectin methylesterase inhibitor	AT2G45220.1|Symbols:|Plant invertase/pectin methylesterase inhibitor superfamily
Glyma.16G024600	-10.8722	9.52341e-12	NA	AT1G01320.2|Symbols:|Tetratricopeptide repeat (TPR)-like superfamily protein
Glyma.10G236000	-10.3396	9.66341e-15	NA	AT5G52300.2|Symbols:RD29B, LTI65|CAP160 protein
Glyma.08G156300	-10.267	2.58533e-14	Aminotransferase class-V	NA
Glyma.03G029000	-10.177	5.8742e-14	Pectinesterase; Plant invertase/pectin methylesterase inhibitor	AT2G45220.1|Symbols:|Plant invertase/pectin methylesterase inhibitor superfamily
Glyma.U006200	-9.77047	1.38035e-11	Plant nuclear matrix protein 1 (NMP1)	NA
Glyma.20G158500	-9.51392	6.094e-12	NA	AT5G52300.2|Symbols:RD29B, LTI65|CAP160 protein
Glyma.04G193900	-9.34332	3.78592e-10	NA	AT3G48510.1|Symbols:|unknown protein
Glyma.04G040100	-9.26281	2.83749e-10	NA	NA
Glyma.04G109100	-9.20258	2.25344e-10	NA	NA
Glyma.13G033400	-8.92903	7.4973e-10	Protein kinase domain	AT5G38260.1|Symbols:|Protein kinase superfamily protein
Glyma.18G263200	-8.86401	5.60987e-07	ABC transporter transmembrane region; ABC transporter	AT3G13080.1|Symbols:ATMRP3, MRP3, ABCC3|multidrug resistance-associated protein 3
Glyma.20G140200	-8.70593	6.80017e-09	Protein tyrosine kinase; Salt stress response/antifungal	AT4G05200.1|Symbols:CRK25|cysteine-rich RLK (RECEPTOR-like protein kinase) 25
Glyma.01G202100	-8.6124	2.01735e-07	Pollen allergen; Rare lipoprotein A (RlpA)-like double-psi beta-barrel	AT4G17030.1|Symbols:ATEXLB1, EXPR, AT-EXPR, ATEXPR1, ATHEXP BETA 3.1, EXLB1|expansin-like B1
Glyma.09G029900	-8.6062	1.49956e-26	AMP-binding enzyme	AT3G16910.1|Symbols:AAE7, ACN1|acyl-activating enzyme 7
Glyma.11G024100	-8.45758	8.2756e-08	Glutathione peroxidase	AT4G11600.1|Symbols:ATGPX6, PHGPX, LSC803, GPX6|glutathione peroxidase 6
Glyma.09G157500	-8.22086	5.26289e-07	Arabidopsis protein of unknown function	NA
Glyma.18G167600	-7.97357	1.98068e-06	NA	NA
Glyma.16G201800	-7.8489	4.20212e-06	Transferase family	AT5G17540.1|Symbols:|HXXXD-type acyl-transferase family protein
Glyma.11G196600	-7.80001	2.33342e-05	Eukaryotic-type carbonic anhydrase	AT1G08080.1|Symbols:ATACA7, ACA7|alpha carbonic anhydrase 7
Glyma.05G049800	-7.77581	9.09138e-06	AP2 domain	AT5G52020.1|Symbols:|Integrase-type DNA-binding superfamily protein
Glyma.05G045800	-7.72556	2.03451e-05	NA	AT5G63350.1|Symbols:|unknown protein
Glyma.03G059100	-7.67262	1.08522e-05	EamA-like transporter family	AT1G44800.1|Symbols:|nodulin MtN21 /EamA-like transporter family protein
Glyma.06G201200	-7.67242	1.18497e-05	NA	AT1G26610.1|Symbols:|C2H2-like zinc finger protein
Glyma.11G252800	-7.65965	1.44673e-05	Protein of unknown function (DUF1264)	AT1G05510.1|Symbols:|Protein of unknown function (DUF1264)
Glyma.09G138000	-7.64607	2.44713e-05	PAR1 protein	AT5G52390.1|Symbols:|PAR1 protein
Glyma.13G003300	-7.63181	1.50942e-05	NA	AT2G32210.1|Symbols:|unknown protein
Glyma.18G259100	-7.60437	2.98477e-05	Myb-like DNA-binding domain	AT3G28910.1|Symbols:ATMYB30, MYB30|myb domain protein 30
Glyma.15G101600	-7.58973	3.72867e-05	F-box domain	AT3G23880.1|Symbols:|F-box and associated interaction domains-containing protein
Glyma.01G181600	-7.54808	9.18875e-05	GDSL-like Lipase/Acylhydrolase	AT2G23540.1|Symbols:|GDSL-like Lipase/Acylhydrolase superfamily protein
Glyma.02G048600	-7.45697	4.38018e-05	2OG-Fe(II) oxygenase superfamily	AT3G51240.1|Symbols:F3H, TT6, F3'H|flavanone 3-hydroxylase
Glyma.15G000100	-7.42608	0.000158765	Microtubule associated protein (MAP65/ASE1 family)	AT2G01910.2|Symbols:ATMAP65-6, MAP65-6|Microtubule associated protein (MAP65/ASE1) family protein
Glyma.12G094300	-7.41026	9.49861e-05	SecA preprotein cross-linking domain	AT1G21650.2|Symbols:SECA2|Preprotein translocase SecA family protein
Glyma.17G127900	-7.40277	1.13172e-27	NA	AT5G50360.1|Symbols:|unknown protein
Glyma.06G157000	-7.3267	0.000178894	NA	AT1G27990.1|Symbols:|unknown protein
Glyma.U006000	-7.3107	0.000348582	Leucine Rich Repeat	AT2G34930.1|Symbols:|disease resistance family protein / LRR family protein
Glyma.18G019300	-7.22304	0.00102077	Heavy-metal-associated domain	AT4G39700.1|Symbols:|Heavy metal transport/detoxification superfamily protein
Glyma.07G151200	-7.2025	0.000301032	NA	AT5G01370.1|Symbols:ACI1|ALC-interacting protein 1
Glyma.08G338900	-7.20245	0.000926628	UDP-glucoronosyl and UDP-glucosyl transferase	AT4G01070.1|Symbols:GT72B1, UGT72B1|UDP-Glycosyltransferase superfamily protein
Glyma.03G017700	-7.16614	0.000361288	NA	NA
Glyma.08G078800	-7.10808	0.000883596	NA	AT5G06860.1|Symbols:PGIP1, ATPGIP1|polygalacturonase inhibiting protein 1
Glyma.03G030400	-7.08882	0.00111716	Cytochrome P450	AT4G31500.1|Symbols:CYP83B1, SUR2, RNT1, RED1, ATR4|cytochrome P450, family 83, subfamily B, polypeptide 1
Glyma.03G058600	-7.08662	0.00082827	NA	NA
Glyma.01G186300	-7.0263	0.000578123	Remorin, C-terminal region	AT1G45207.2|Symbols:|Remorin family protein
Glyma.17G115300	-7.00549	0.00151678	POT family	AT2G26690.1|Symbols:|Major facilitator superfamily protein
Glyma.15G077700	-7.00474	0.000771045	DnaJ domain; DnaJ C terminal domain	AT2G20560.1|Symbols:|DNAJ heat shock family protein
Glyma.07G043600	-6.98513	0.0045537	Hsp20/alpha crystallin family	AT1G54050.1|Symbols:|HSP20-like chaperones superfamily protein
Glyma.02G255900	-6.98368	0.000884376	Ubiquitin-binding WIYLD domain	AT2G40020.2|Symbols:|Nucleolar histone methyltransferase-related protein
Glyma.03G226000	-6.91801	0.00132992	Cellulase (glycosyl hydrolase family 5)	AT5G66460.1|Symbols:MAN7, AtMAN7|Glycosyl hydrolase superfamily protein
Glyma.09G184600	-6.91703	0.00208257	B-box zinc finger; CCT motif	AT1G25440.1|Symbols:|B-box type zinc finger protein with CCT domain
Glyma.15G049900	-6.91698	0.00172506	EamA-like transporter family	AT1G68170.1|Symbols:|nodulin MtN21 /EamA-like transporter family protein
Glyma.17G131900	-6.87238	0.00188461	AP2 domain	AT4G25470.1|Symbols:CBF2, DREB1C, FTQ4, ATCBF2|C-repeat/DRE binding factor 2
Glyma.17G243900	-6.87023	0.00421737	Patatin-like phospholipase	AT2G26560.1|Symbols:PLP2, PLA IIA, PLA2A|phospholipase A 2A
Glyma.11G239000	-6.77518	0.0034858	Ethylene insensitive 3	AT5G10120.1|Symbols:|Ethylene insensitive 3 family protein
Glyma.02G123600	-6.72517	0.00308273	NA	NA
Glyma.03G028900	-6.69968	0.00468043	Pectinesterase; Plant invertase/pectin methylesterase inhibitor	AT3G60730.1|Symbols:|Plant invertase/pectin methylesterase inhibitor superfamily
Glyma.19G147200	-6.59111	0.00642754	Late embryogenesis abundant (LEA) group 1	AT5G06760.1|Symbols:LEA4-5|Late Embryogenesis Abundant 4-5
Glyma.12G132600	-6.56202	0.00711095	Protein kinase domain	AT4G14480.1|Symbols:|Protein kinase superfamily protein
Glyma.10G088900	-6.5616	0.00562276	Glycosyl hydrolases family 28	AT3G07970.1|Symbols:QRT2|Pectin lyase-like superfamily protein
Glyma.09G045000	-6.55075	6.99148e-47	Ribosomal protein S21e	AT5G27700.1|Symbols:|Ribosomal protein S21e
Glyma.13G324400	-6.53356	0.00876667	Eukaryotic-type carbonic anhydrase	AT1G08080.1|Symbols:ATACA7, ACA7|alpha carbonic anhydrase 7
Glyma.03G261500	-6.50305	0.00741753	NA	AT2G46820.2|Symbols:PTAC8, TMP14, PSAP, PSI-P|photosystem I P subunit
Glyma.10G173700	-6.50233	0.0071727	Dof domain, zinc finger	AT4G24060.1|Symbols:|Dof-type zinc finger DNA-binding family protein
Glyma.11G091600	-6.48945	4.05057e-36	AMP-binding enzyme	AT1G65060.1|Symbols:4CL3|4-coumarate:CoA ligase 3
Glyma.03G033100	-6.30961	9.82963e-09	UbiA prenyltransferase family	AT2G18950.1|Symbols:HPT1, TPT1, ATHPT, VTE2|homogentisate phytyltransferase 1
Glyma.U041300	-6.22607	0.00116568	Sodium/hydrogen exchanger family	AT2G19600.1|Symbols:ATKEA4, KEA4|K+ efflux antiporter 4
Glyma.11G225000	-6.17303	0.000196217	NA	AT3G53980.2|Symbols:|Bifunctional inhibitor/lipid-transfer protein/seed storage 2S albumin superfamily protein
Glyma.16G212200	-5.99597	2.19462e-203	Trypsin and protease inhibitor	AT1G17860.1|Symbols:|Kunitz family trypsin and protease inhibitor protein
Glyma.19G244200	-5.89344	2.62428e-06	Aldo/keto reductase family	AT1G60690.1|Symbols:|NAD(P)-linked oxidoreductase superfamily protein
Glyma.20G152500	-5.82971	2.63461e-06	3-Oxoacyl-[acyl-carrier-protein (ACP)] synthase III C terminal ; FAE1/Type III polyketide synthase-like protein	AT1G25450.1|Symbols:KCS5, CER60|3-ketoacyl-CoA synthase 5
Glyma.09G163200	-5.66653	2.18296e-39	Trypsin and protease inhibitor	AT1G17860.1|Symbols:|Kunitz family trypsin and protease inhibitor protein
Glyma.05G123700	-5.43359	7.20574e-33	Leucine Rich Repeat; Leucine rich repeat N-terminal domain	AT5G06860.1|Symbols:PGIP1, ATPGIP1|polygalacturonase inhibiting protein 1
Glyma.03G014300	-5.26748	0.00111334	short chain dehydrogenase	AT3G61220.1|Symbols:|NAD(P)-binding Rossmann-fold superfamily protein
Glyma.13G363300	-5.16602	1.14604e-70	NA	AT1G52690.2|Symbols:|Late embryogenesis abundant protein (LEA) family protein
Glyma.13G109800	-5.1615	1.39405e-111	NADH:flavin oxidoreductase / NADH oxidase family	AT2G06050.3|Symbols:OPR3|oxophytodienoate-reductase 3
Glyma.05G123900	-5.1509	3.85235e-129	Leucine rich repeat N-terminal domain	AT5G06860.1|Symbols:PGIP1, ATPGIP1|polygalacturonase inhibiting protein 1
Glyma.20G148000	-5.10066	0.00477198	Cytochrome P450	AT2G45550.1|Symbols:CYP76C4|cytochrome P450, family 76, subfamily C, polypeptide 4
Glyma.13G222100	-5.06151	0.00103538	2OG-Fe(II) oxygenase superfamily	AT1G17020.1|Symbols:SRG1, ATSRG1|senescence-related gene 1
Glyma.05G214600	-5.00071	9.35665e-05	NA	NA
Glyma.15G012800	-4.94175	8.85504e-17	AUX/IAA family	AT3G15540.1|Symbols:IAA19, MSG2|indole-3-acetic acid inducible 19
Glyma.11G211300	-4.88094	0.000248965	Transcription factor Tfb2	AT4G17020.3|Symbols:|transcription factor-related
Glyma.18G032700	-4.8052	1.20318e-55	NA	AT3G53980.2|Symbols:|Bifunctional inhibitor/lipid-transfer protein/seed storage 2S albumin superfamily protein
Glyma.02G219100	-4.78682	0.00782226	NA	AT5G05220.1|Symbols:|unknown protein
Glyma.18G033000	-4.76965	6.05609e-135	NA	AT3G53980.2|Symbols:|Bifunctional inhibitor/lipid-transfer protein/seed storage 2S albumin superfamily protein
Glyma.16G210800	-4.76064	0.00705123	TIR domain; NB-ARC domain	AT5G36930.2|Symbols:|Disease resistance protein (TIR-NBS-LRR class) family
Glyma.20G050600	-4.74989	0.00612634	Leucine Rich Repeat; NB-ARC domain	AT3G14470.1|Symbols:|NB-ARC domain-containing disease resistance protein
Glyma.08G212000	-4.71965	0.00580298	Hsp20/alpha crystallin family	AT1G52560.1|Symbols:|HSP20-like chaperones superfamily protein
Glyma.18G298000	-4.71405	0.00855644	alpha/beta hydrolase fold	AT5G16080.1|Symbols:AtCXE17, CXE17|carboxyesterase 17
Glyma.11G224900	-4.62994	1.09419e-32	NA	AT3G53980.2|Symbols:|Bifunctional inhibitor/lipid-transfer protein/seed storage 2S albumin superfamily protein
Glyma.13G167700	-4.62775	2.37422e-06	POT family	AT2G26690.1|Symbols:|Major facilitator superfamily protein
Glyma.10G064400	-4.61677	2.32477e-05	Late embryogenesis abundant protein	AT2G36640.1|Symbols:ATECP63, ECP63|embryonic cell protein 63
Glyma.05G191100	-4.5657	2.66788e-20	Aminotransferase class-V	NA
Glyma.18G032400	-4.54203	2.92387e-119	NA	AT3G53980.2|Symbols:|Bifunctional inhibitor/lipid-transfer protein/seed storage 2S albumin superfamily protein
Glyma.18G032800	-4.51717	8.56544e-120	NA	AT3G53980.2|Symbols:|Bifunctional inhibitor/lipid-transfer protein/seed storage 2S albumin superfamily protein
Glyma.05G057700	-4.49809	1.36682e-05	Protease inhibitor/seed storage/LTP family	AT2G45180.1|Symbols:|Bifunctional inhibitor/lipid-transfer protein/seed storage 2S albumin superfamily protein
Glyma.15G146000	-4.48921	0.000207497	Pathogenesis-related protein Bet v I family	NA
Glyma.05G142500	-4.48561	1.77195e-05	Sugar (and other) transporter	AT1G30220.1|Symbols:ATINT2, INT2|inositol transporter 2
Glyma.01G126700	-4.38596	0.00289218	Dirigent-like protein	AT1G58170.1|Symbols:|Disease resistance-responsive (dirigent-like protein) family protein
Glyma.19G002400	-4.38403	0.000180615	Peptidase C26	AT5G38200.1|Symbols:|Class I glutamine amidotransferase-like superfamily protein
Glyma.20G147900	-4.31487	1.08087e-19	Cytochrome P450	AT2G45550.1|Symbols:CYP76C4|cytochrome P450, family 76, subfamily C, polypeptide 4
Glyma.09G163100	-4.2863	2.32044e-10	Trypsin and protease inhibitor	AT1G17860.1|Symbols:|Kunitz family trypsin and protease inhibitor protein
Glyma.06G246400	-4.28183	1.91289e-09	Pollen allergen; Rare lipoprotein A (RlpA)-like double-psi beta-barrel	AT3G15370.1|Symbols:ATEXPA12, EXP12, ATEXP12, ATHEXP ALPHA 1.24, EXPA12|expansin 12
Glyma.18G032500	-4.26416	0	NA	AT3G53980.2|Symbols:|Bifunctional inhibitor/lipid-transfer protein/seed storage 2S albumin superfamily protein
Glyma.12G234600	-4.21923	0.00137052	Sodium Bile acid symporter family	AT1G78560.1|Symbols:|Sodium Bile acid symporter family
Glyma.18G032300	-4.1937	5.71491e-80	NA	AT3G53980.2|Symbols:|Bifunctional inhibitor/lipid-transfer protein/seed storage 2S albumin superfamily protein
Glyma.07G186000	-4.17735	8.74907e-35	Aminotransferase class IV	AT1G50090.1|Symbols:|D-aminoacid aminotransferase-like PLP-dependent enzymes superfamily protein
Glyma.19G231700	-4.13006	0.00188628	alpha/beta hydrolase fold	AT3G05600.1|Symbols:|alpha/beta-Hydrolases superfamily protein
Glyma.07G262900	-4.11113	1.00575e-27	Stigma-specific protein, Stig1	AT1G11925.1|Symbols:|Stigma-specific Stig1 family protein
Glyma.09G163300	-4.05804	2.70989e-62	Trypsin and protease inhibitor	AT1G17860.1|Symbols:|Kunitz family trypsin and protease inhibitor protein
Glyma.11G180800	-4.02878	1.5031e-14	short chain dehydrogenase	AT1G52340.1|Symbols:ABA2, SIS4, GIN1, SDR1, ISI4, SRE1, ATABA2, ATSDR1|NAD(P)-binding Rossmann-fold superfamily protein
Glyma.12G230100	-3.98144	0.00489581	NA	NA
Glyma.06G092900	-3.97629	2.19813e-79	Rhamnogalacturonate lyase family	AT1G09890.1|Symbols:|Rhamnogalacturonate lyase family protein
Glyma.16G212100	-3.96276	1.76687e-53	Trypsin and protease inhibitor	AT1G17860.1|Symbols:|Kunitz family trypsin and protease inhibitor protein
Glyma.18G032900	-3.95145	1.97264e-75	NA	AT3G53980.2|Symbols:|Bifunctional inhibitor/lipid-transfer protein/seed storage 2S albumin superfamily protein
Glyma.15G275400	-3.93757	4.12782e-33	Glycosyl hydrolases family 28	AT3G07970.1|Symbols:QRT2|Pectin lyase-like superfamily protein
Glyma.01G225100	-3.80705	5.47729e-17	Protein phosphatase 2C	AT2G29380.1|Symbols:HAI3|highly ABA-induced PP2C gene 3
Glyma.10G017200	-3.79601	1.25971e-119	Pectinesterase; Plant invertase/pectin methylesterase inhibitor	AT4G02330.1|Symbols:ATPMEPCRB|Plant invertase/pectin methylesterase inhibitor superfamily
Glyma.05G124000	-3.78739	2.58323e-230	Leucine Rich Repeat; Leucine rich repeat N-terminal domain	AT5G06860.1|Symbols:PGIP1, ATPGIP1|polygalacturonase inhibiting protein 1
Glyma.03G029100	-3.76747	7.99377e-06	Pectinesterase; Plant invertase/pectin methylesterase inhibitor	AT2G45220.1|Symbols:|Plant invertase/pectin methylesterase inhibitor superfamily
Glyma.09G006100	-3.75627	1.02892e-10	Stigma-specific protein, Stig1	AT1G11925.1|Symbols:|Stigma-specific Stig1 family protein
Glyma.06G270400	-3.75526	1.41674e-11	Polyphenol oxidase middle domain; Protein of unknown function (DUF B2219); Common central domain of tyrosinase	NA
Glyma.10G070300	-3.74934	2.75477e-17	UbiA prenyltransferase family	AT2G18950.1|Symbols:HPT1, TPT1, ATHPT, VTE2|homogentisate phytyltransferase 1
Glyma.14G167800	-3.73028	3.06537e-10	NA	NA
Glyma.05G065300	-3.70786	4.92275e-72	Pollen allergen; Rare lipoprotein A (RlpA)-like double-psi beta-barrel	AT4G17030.1|Symbols:ATEXLB1, EXPR, AT-EXPR, ATEXPR1, ATHEXP BETA 3.1, EXLB1|expansin-like B1
Glyma.10G174600	-3.69243	1.44567e-06	Melibiase	AT5G08370.1|Symbols:AtAGAL2, AGAL2|alpha-galactosidase 2
Glyma.18G033200	-3.67517	5.21917e-112	Protease inhibitor/seed storage/LTP family	AT3G53980.2|Symbols:|Bifunctional inhibitor/lipid-transfer protein/seed storage 2S albumin superfamily protein
Glyma.06G021200	-3.67457	6.94181e-47	AhpC/TSA family	AT1G60420.1|Symbols:|DC1 domain-containing protein
Glyma.09G163600	-3.65806	2.09783e-79	Trypsin and protease inhibitor	AT1G17860.1|Symbols:|Kunitz family trypsin and protease inhibitor protein
Glyma.02G055500	-3.62005	6.52587e-15	U-box domain; Kinesin-associated protein (KAP)	AT4G36550.1|Symbols:|ARM repeat superfamily protein
Glyma.18G033100	-3.55336	2.10293e-213	NA	AT3G53980.2|Symbols:|Bifunctional inhibitor/lipid-transfer protein/seed storage 2S albumin superfamily protein
Glyma.08G056600	-3.54817	2.36842e-19	Putative lysophospholipase	AT1G73480.1|Symbols:|alpha/beta-Hydrolases superfamily protein
Glyma.06G167900	-3.53365	3.76959e-20	TB2/DP1, HVA22 family	AT5G50720.1|Symbols:ATHVA22E, HVA22E|HVA22 homologue E
Glyma.11G198500	-3.44834	1.72642e-75	Glutathione S-transferase, N-terminal domain; Glutathione S-transferase, C-terminal domain	AT1G78380.1|Symbols:ATGSTU19, GST8, GSTU19|glutathione S-transferase TAU 19
Glyma.16G143900	-3.43898	1.91769e-08	NA	NA
Glyma.20G119300	-3.40741	6.17428e-07	Protein kinase domain	AT1G25390.1|Symbols:|Protein kinase superfamily protein
Glyma.13G349300	-3.35086	5.69735e-20	Glycosyl hydrolases family 32 C terminal; Glycosyl hydrolases family 32 N-terminal domain	AT3G13790.1|Symbols:ATCWINV1, ATBFRUCT1|Glycosyl hydrolases family 32 protein
Glyma.05G049900	-3.33194	0.000204287	AP2 domain	AT1G12610.1|Symbols:DDF1|Integrase-type DNA-binding superfamily protein
Glyma.07G212400	-3.32198	9.92582e-05	AP2 domain	AT4G34410.1|Symbols:RRTF1|redox responsive transcription factor 1
Glyma.17G137400	-3.30725	1.12942e-73	Plant invertase/pectin methylesterase inhibitor	AT3G47380.1|Symbols:|Plant invertase/pectin methylesterase inhibitor superfamily protein
Glyma.04G036600	-3.29558	4.51549e-36	Plastocyanin-like domain	AT2G15770.1|Symbols:|Cupredoxin superfamily protein
Glyma.20G199600	-3.2708	6.6156e-32	Aconitase family (aconitate hydratase)	AT4G13430.1|Symbols:IIL1, ATLEUC1|isopropyl malate isomerase large subunit 1
Glyma.16G199000	-3.26706	1.53466e-18	AP2 domain	AT5G51990.1|Symbols:CBF4, DREB1D|C-repeat-binding factor 4
Glyma.18G290400	-3.25987	2.81962e-19	NA	AT2G44310.1|Symbols:|Calcium-binding EF-hand family protein
Glyma.15G264300	-3.25926	9.42093e-163	GDSL-like Lipase/Acylhydrolase	AT1G53920.1|Symbols:GLIP5|GDSL-motif lipase 5
Glyma.09G006200	-3.24847	8.45303e-10	Stigma-specific protein, Stig1	AT1G11925.1|Symbols:|Stigma-specific Stig1 family protein
Glyma.15G024600	-3.23984	5.2334e-101	Glycosyl hydrolases family 32 C terminal; Glycosyl hydrolases family 32 N-terminal domain	AT3G13790.1|Symbols:ATCWINV1, ATBFRUCT1|Glycosyl hydrolases family 32 protein
Glyma.02G016600	-3.23623	8.33498e-113	Pectinesterase; Plant invertase/pectin methylesterase inhibitor	AT4G02330.1|Symbols:ATPMEPCRB|Plant invertase/pectin methylesterase inhibitor superfamily
Glyma.10G215700	-3.17473	2.46169e-91	O-methyltransferase; Dimerisation domain	AT5G54160.1|Symbols:ATOMT1, OMT1|O-methyltransferase 1
Glyma.18G046300	-3.1448	1.40022e-28	Protein tyrosine kinase; Salt stress response/antifungal	AT1G70520.1|Symbols:CRK2|cysteine-rich RLK (RECEPTOR-like protein kinase) 2
Glyma.06G264800	-3.14086	0.00508182	NA	NA
Glyma.08G244800	-3.1281	2.37667e-120	UDP-glucoronosyl and UDP-glucosyl transferase	AT3G02100.1|Symbols:|UDP-Glycosyltransferase superfamily protein
Glyma.15G270000	-3.11564	1.11178e-12	NA	NA
Glyma.20G096900	-3.10446	2.65343e-05	Tetratricopeptide repeat	AT1G56440.1|Symbols:TPR5|Tetratricopeptide repeat (TPR)-like superfamily protein
Glyma.08G175200	-3.104	5.07695e-76	Glutathione S-transferase, C-terminal domain; Glutathione S-transferase, N-terminal domain	AT1G78380.1|Symbols:ATGSTU19, GST8, GSTU19|glutathione S-transferase TAU 19
Glyma.09G269400	-3.06982	3.21195e-14	NAD dependent epimerase/dehydratase family	AT2G45400.1|Symbols:BEN1|NAD(P)-binding Rossmann-fold superfamily protein
Glyma.09G162800	-3.06814	1.002e-47	Trypsin and protease inhibitor	AT1G17860.1|Symbols:|Kunitz family trypsin and protease inhibitor protein
Glyma.01G219400	-3.04822	0.00191945	Glutathione peroxidase	AT4G11600.1|Symbols:ATGPX6, PHGPX, LSC803, GPX6|glutathione peroxidase 6
Glyma.08G042000	-3.03775	0.00967866	Helix-loop-helix DNA-binding domain	AT1G73830.1|Symbols:BEE3|BR enhanced expression 3
Glyma.08G140600	-3.0307	1.69584e-70	Cytochrome P450	AT4G36220.1|Symbols:FAH1, CYP84A1|ferulic acid 5-hydroxylase 1
Glyma.08G062800	-3.00922	9.10591e-06	Protein kinase domain	AT5G48380.1|Symbols:BIR1|BAK1-interacting receptor-like kinase 1
Glyma.20G117000	-2.99689	2.4344e-06	Myb-like DNA-binding domain	AT1G68320.1|Symbols:MYB62, AtMYB62, BW62B, BW62C|myb domain protein 62
Glyma.02G140600	-2.98287	0.00275795	Zeta toxin	AT2G30630.1|Symbols:|P-loop containing nucleoside triphosphate hydrolases superfamily protein
Glyma.07G189300	-2.96716	4.12107e-06	Myb-like DNA-binding domain	AT4G21440.1|Symbols:ATMYB102, ATM4, MYB102|MYB-like 102
Glyma.14G162100	-2.95554	2.0566e-12	Protein phosphatase 2C	AT2G29380.1|Symbols:HAI3|highly ABA-induced PP2C gene 3
Glyma.10G226200	-2.9548	4.51037e-05	Pyridoxal-dependent decarboxylase conserved domain	AT1G43710.1|Symbols:emb1075|Pyridoxal phosphate (PLP)-dependent transferases superfamily protein
Glyma.08G078900	-2.95239	8.37876e-87	Leucine Rich Repeat; Leucine rich repeat N-terminal domain	AT5G06860.1|Symbols:PGIP1, ATPGIP1|polygalacturonase inhibiting protein 1
Glyma.13G193800	-2.93715	3.28947e-05	VQ motif	AT3G56710.1|Symbols:SIB1|sigma factor binding protein 1
Glyma.01G172900	-2.89401	7.83313e-96	NmrA-like family	AT1G75280.1|Symbols:|NmrA-like negative transcriptional regulator family protein
Glyma.02G022200	-2.89207	3.57578e-06	POT family	AT1G69850.1|Symbols:ATNRT1:2, NTL1, NRT1:2|nitrate transporter 1:2
Glyma.10G201700	-2.88703	7.98261e-08	Glycosyl transferase family 2	AT5G03760.1|Symbols:ATCSLA09, CSLA09, ATCSLA9, CSLA9, RAT4|Nucleotide-diphospho-sugar transferases superfamily protein
Glyma.07G251200	-2.88097	0.00800953	Domain of unknown function (DUF588)	AT4G15630.1|Symbols:|Uncharacterised protein family (UPF0497)
Glyma.16G196300	-2.87841	2.95604e-15	Phosphatidylethanolamine-binding protein	AT5G03840.1|Symbols:TFL1, TFL-1|PEBP (phosphatidylethanolamine-binding protein) family protein
Glyma.18G290300	-2.86953	4.9081e-52	NA	AT2G44310.1|Symbols:|Calcium-binding EF-hand family protein
Glyma.14G189700	-2.84473	4.45207e-07	NA	NA
Glyma.06G036700	-2.83556	7.39162e-51	Plastocyanin-like domain	AT2G15770.1|Symbols:|Cupredoxin superfamily protein
Glyma.06G205600	-2.82452	5.03663e-17	Reversibly glycosylated polypeptide	AT3G08900.1|Symbols:RGP3, RGP|reversibly glycosylated polypeptide 3
Glyma.19G146800	-2.82183	2.63745e-47	Cytochrome P450	AT5G06900.1|Symbols:CYP93D1|cytochrome P450, family 93, subfamily D, polypeptide 1
Glyma.19G227800	-2.80671	6.14526e-24	Glycosyl transferase family 8	AT1G56600.1|Symbols:AtGolS2, GolS2|galactinol synthase 2
Glyma.13G226700	-2.77527	3.1784e-06	NA	NA
Glyma.14G051800	-2.75503	2.1796e-36	NA	AT2G44310.1|Symbols:|Calcium-binding EF-hand family protein
Glyma.15G145600	-2.75418	1.88165e-75	Pathogenesis-related protein Bet v I family	NA
Glyma.12G048100	-2.74887	1.08039e-25	NA	NA
Glyma.12G093700	-2.74131	0.00488668	NA	AT3G52460.1|Symbols:|hydroxyproline-rich glycoprotein family protein
Glyma.15G223900	-2.72747	1.31963e-15	NADH:flavin oxidoreductase / NADH oxidase family	AT1G76690.1|Symbols:OPR2, ATOPR2|12-oxophytodienoate reductase 2
Glyma.15G264200	-2.71914	1.8525e-19	GDSL-like Lipase/Acylhydrolase	AT1G53920.1|Symbols:GLIP5|GDSL-motif lipase 5
Glyma.03G173100	-2.70626	0.000167558	NA	AT2G37430.1|Symbols:|C2H2 and C2HC zinc fingers superfamily protein
Glyma.09G163800	-2.69974	2.49572e-48	Trypsin and protease inhibitor	AT1G73325.1|Symbols:|Kunitz family trypsin and protease inhibitor protein
Glyma.02G086900	-2.69398	2.51433e-22	Pectinesterase	AT3G24130.1|Symbols:|Pectin lyase-like superfamily protein
Glyma.05G215700	-2.69022	5.13486e-05	NA	AT5G41810.2|Symbols:|unknown protein
Glyma.08G270600	-2.68855	5.41134e-28	3-beta hydroxysteroid dehydrogenase/isomerase family	AT2G23910.1|Symbols:|NAD(P)-binding Rossmann-fold superfamily protein
Glyma.08G338800	-2.67862	2.81141e-11	UDP-glucoronosyl and UDP-glucosyl transferase	AT4G01070.1|Symbols:GT72B1, UGT72B1|UDP-Glycosyltransferase superfamily protein
Glyma.12G023600	-2.64545	0.00831804	Major intrinsic protein	AT2G37170.1|Symbols:PIP2B, PIP2;2|plasma membrane intrinsic protein 2
Glyma.09G210900	-2.61245	0.000416985	Phosphoribulokinase / Uridine kinase family	AT1G32060.1|Symbols:PRK|phosphoribulokinase
Glyma.09G107100	-2.61242	5.17066e-06	2OG-Fe(II) oxygenase superfamily	AT5G05600.1|Symbols:|2-oxoglutarate (2OG) and Fe(II)-dependent oxygenase superfamily protein
Glyma.09G237600	-2.60444	2.74324e-09	POT family	AT1G32450.1|Symbols:NRT1.5|nitrate transporter 1.5
Glyma.17G146900	-2.60066	4.48451e-69	Pollen allergen; Rare lipoprotein A (RlpA)-like double-psi beta-barrel	AT4G17030.1|Symbols:ATEXLB1, EXPR, AT-EXPR, ATEXPR1, ATHEXP BETA 3.1, EXLB1|expansin-like B1
Glyma.17G147200	-2.59711	3.8231e-68	Pollen allergen; Rare lipoprotein A (RlpA)-like double-psi beta-barrel	AT4G17030.1|Symbols:ATEXLB1, EXPR, AT-EXPR, ATEXPR1, ATHEXP BETA 3.1, EXLB1|expansin-like B1
Glyma.09G224500	-2.59091	2.78875e-05	Cellulase (glycosyl hydrolase family 5)	AT5G66460.1|Symbols:MAN7, AtMAN7|Glycosyl hydrolase superfamily protein
Glyma.18G190200	-2.58676	0.000862582	Glutathione S-transferase, C-terminal domain; Glutathione S-transferase, N-terminal domain	AT3G09270.1|Symbols:ATGSTU8, GSTU8|glutathione S-transferase TAU 8
Glyma.03G187000	-2.58266	0.000236159	UDP-glucoronosyl and UDP-glucosyl transferase	AT2G36750.1|Symbols:UGT73C1|UDP-glucosyl transferase 73C1
Glyma.06G239500	-2.5735	1.86134e-14	UDP-glucoronosyl and UDP-glucosyl transferase	AT3G50740.1|Symbols:UGT72E1|UDP-glucosyl transferase 72E1
Glyma.12G097200	-2.56457	9.32955e-06	Protein kinase domain	AT1G05100.1|Symbols:MAPKKK18|mitogen-activated protein kinase kinase kinase 18
Glyma.13G314400	-2.55919	1.60905e-10	NA	AT3G11600.1|Symbols:|unknown protein
Glyma.13G095000	-2.55508	3.46875e-10	Glycosyl hydrolases family 16; Xyloglucan endo-transglycosylase (XET) C-terminus	AT4G25810.1|Symbols:XTR6, XTH23|xyloglucan endotransglycosylase 6
Glyma.14G176800	-2.53632	0.000143959	Protein of unknown function (DUF1637)	AT2G42670.2|Symbols:|Protein of unknown function (DUF1637)
Glyma.11G062500	-2.53263	9.26905e-132	Cytochrome P450	AT3G26300.1|Symbols:CYP71B34|cytochrome P450, family 71, subfamily B, polypeptide 34
Glyma.19G007700	-2.50984	2.03784e-08	Carbonic anhydrase	AT3G01500.2|Symbols:CA1|carbonic anhydrase 1
Glyma.09G162700	-2.50675	4.1724e-47	Trypsin and protease inhibitor	AT1G17860.1|Symbols:|Kunitz family trypsin and protease inhibitor protein
Glyma.05G042800	-2.49647	0.00854451	Cytochrome P450	AT1G13110.1|Symbols:CYP71B7|cytochrome P450, family 71 subfamily B, polypeptide 7
Glyma.09G040400	-2.48956	5.43072e-117	Pathogenesis-related protein Bet v I family	NA
Glyma.15G203500	-2.47749	1.04232e-19	Cytochrome P450	AT4G31940.1|Symbols:CYP82C4|cytochrome P450, family 82, subfamily C, polypeptide 4
Glyma.06G302400	-2.45835	7.34556e-05	Protein of unknown function, DUF604	AT1G05280.1|Symbols:|Protein of unknown function (DUF604)
Glyma.08G042100	-2.45444	4.71574e-12	Myb-like DNA-binding domain	AT1G25340.1|Symbols:MYB116, AtMYB116|myb domain protein 116
Glyma.18G265800	-2.44846	2.5955e-11	UDP-glucoronosyl and UDP-glucosyl transferase	AT3G02100.1|Symbols:|UDP-Glycosyltransferase superfamily protein
Glyma.18G256900	-2.44462	1.74102e-09	PQQ enzyme repeat; PF10527	NA
Glyma.02G208600	-2.44119	0.00814471	Protein of unknown function (DUF1637)	AT2G42670.2|Symbols:|Protein of unknown function (DUF1637)
Glyma.09G281800	-2.43788	2.0342e-49	O-methyltransferase; Dimerisation domain	AT5G54160.1|Symbols:ATOMT1, OMT1|O-methyltransferase 1
Glyma.16G187300	-2.4054	0.00058095	Leucine Rich Repeat; Leucine rich repeat N-terminal domain	AT1G73080.1|Symbols:PEPR1, ATPEPR1|PEP1 receptor 1
Glyma.01G078700	-2.40042	0.00406025	NA	NA
Glyma.13G085900	-2.39491	3.61032e-05	NA	NA
Glyma.19G216400	-2.38955	0.00126868	Prolyl oligopeptidase family	AT2G47390.1|Symbols:|Prolyl oligopeptidase family protein
Glyma.07G073700	-2.38908	0.00712273	TrkA-N domain; Sodium/hydrogen exchanger family	AT4G00630.1|Symbols:KEA2, ATKEA2|K+ efflux antiporter 2
Glyma.03G094700	-2.38858	0.000498312	AP2 domain	AT4G27950.1|Symbols:CRF4|cytokinin response factor 4
Glyma.01G056100	-2.38524	3.4001e-17	2OG-Fe(II) oxygenase superfamily	AT1G17020.1|Symbols:SRG1, ATSRG1|senescence-related gene 1
Glyma.14G040000	-2.37565	0.00826098	Protein kinase domain	AT1G14370.1|Symbols:APK2A, PBL2|protein kinase 2A
Glyma.06G260200	-2.36652	3.87759e-47	Aldo/keto reductase family	AT1G60710.1|Symbols:ATB2|NAD(P)-linked oxidoreductase superfamily protein
Glyma.20G012500	-2.35952	0.00436504	Eukaryotic cytochrome b561	AT4G25570.1|Symbols:ACYB-2|Cytochrome b561/ferric reductase transmembrane protein family
Glyma.18G206600	-2.3565	8.80872e-05	AP2 domain	AT2G40340.1|Symbols:DREB2C, AtERF48|Integrase-type DNA-binding superfamily protein
Glyma.16G045100	-2.34679	5.44572e-27	Glycosyl hydrolases family 16; Xyloglucan endo-transglycosylase (XET) C-terminus	AT5G13870.1|Symbols:EXGT-A4, XTH5|xyloglucan endotransglucosylase/hydrolase 5
Glyma.07G079600	-2.3442	4.0389e-06	LysM domain	AT4G25433.1|Symbols:|peptidoglycan-binding LysM domain-containing protein
Glyma.15G156100	-2.34366	0	Cytochrome P450	AT4G37340.1|Symbols:CYP81D3|cytochrome P450, family 81, subfamily D, polypeptide 3
Glyma.01G118000	-2.34046	3.75774e-27	Thiamine pyrophosphate enzyme, C-terminal TPP binding domain; Thiamine pyrophosphate enzyme, N-terminal TPP binding domain; Thiamine pyrophosphate enzyme, central domain	AT5G01320.1|Symbols:|Thiamine pyrophosphate dependent pyruvate decarboxylase family protein
Glyma.18G278800	-2.33323	0.000180039	Adenosylmethionine decarboxylase	AT3G02470.4|Symbols:|S-adenosylmethionine decarboxylase
Glyma.U042300	-2.30882	6.07645e-26	DnaJ domain; DnaJ C terminal domain	AT3G08910.1|Symbols:|DNAJ heat shock family protein
Glyma.05G055200	-2.30395	0.00362487	Plant invertase/pectin methylesterase inhibitor	AT5G62350.1|Symbols:|Plant invertase/pectin methylesterase inhibitor superfamily protein
Glyma.14G208000	-2.30192	1.39462e-24	Late embryogenesis abundant protein	AT1G65690.1|Symbols:|Late embryogenesis abundant (LEA) hydroxyproline-rich glycoprotein family
Glyma.04G121700	-2.29811	2.35811e-69	Protein of unknown function (DUF B2219); Common central domain of tyrosinase; Polyphenol oxidase middle domain	NA
Glyma.17G090900	-2.28796	6.67725e-15	Armadillo/beta-catenin-like repeat; U-box domain	AT1G60190.1|Symbols:|ARM repeat superfamily protein
Glyma.06G042100	-2.28715	8.80703e-05	AP2 domain	AT1G46768.1|Symbols:RAP2.1|related to AP2 1
Glyma.20G004000	-2.27879	0.000449481	RNA recognition motif. (a.k.a. RRM, RBD, or RNP domain)	AT3G18610.1|Symbols:PARLL1, ATNUC-L2, NUC-L2|nucleolin like 2
Glyma.18G260000	-2.27863	2.36573e-14	POT family	AT1G32450.1|Symbols:NRT1.5|nitrate transporter 1.5
Glyma.15G270100	-2.27829	3.68122e-26	NA	NA
Glyma.20G176100	-2.2757	1.3129e-85	O-methyltransferase; Dimerisation domain	AT5G54160.1|Symbols:ATOMT1, OMT1|O-methyltransferase 1
Glyma.11G040700	-2.27378	8.12196e-11	Pollen allergen; Rare lipoprotein A (RlpA)-like double-psi beta-barrel	AT4G17030.1|Symbols:ATEXLB1, EXPR, AT-EXPR, ATEXPR1, ATHEXP BETA 3.1, EXLB1|expansin-like B1
Glyma.16G039600	-2.27086	2.59648e-08	Transferase family	AT2G19070.1|Symbols:SHT|spermidine hydroxycinnamoyl transferase
Glyma.11G238300	-2.26914	4.91828e-54	Aminotransferase class I and II	AT2G22250.1|Symbols:ATAAT, AAT, MEE17|aspartate aminotransferase
Glyma.17G084600	-2.26818	0.00171322	NA	NA
Glyma.11G157100	-2.26396	1.71124e-07	EF hand	AT3G50770.1|Symbols:CML41|calmodulin-like 41
Glyma.19G174000	-2.25665	6.6489e-13	NA	AT2G37430.1|Symbols:|C2H2 and C2HC zinc fingers superfamily protein
Glyma.16G019200	-2.25588	0.00572516	S1/P1 Nuclease	AT1G68290.1|Symbols:ENDO 2|endonuclease 2
Glyma.09G162500	-2.25524	5.82854e-32	Trypsin and protease inhibitor	AT1G17860.1|Symbols:|Kunitz family trypsin and protease inhibitor protein
Glyma.15G110600	-2.24536	5.59743e-26	Stigma-specific protein, Stig1	AT1G11925.1|Symbols:|Stigma-specific Stig1 family protein
Glyma.08G171400	-2.24052	1.75938e-11	NA	AT2G32210.1|Symbols:|unknown protein
Glyma.09G048700	-2.23792	2.82456e-47	Cytochrome P450	AT4G37340.1|Symbols:CYP81D3|cytochrome P450, family 81, subfamily D, polypeptide 3
Glyma.03G106400	-2.22338	1.60269e-13	Protein tyrosine kinase; Protein kinase domain	AT2G32800.1|Symbols:AP4.3A|protein kinase family protein
Glyma.19G231800	-2.22245	6.64934e-45	alpha/beta hydrolase fold	AT3G05600.1|Symbols:|alpha/beta-Hydrolases superfamily protein
Glyma.16G038100	-2.21377	4.51806e-20	NA	NA
Glyma.03G088800	-2.21116	1.17796e-42	Protein kinase domain	AT3G25250.1|Symbols:AGC2-1, AGC2, OXI1, AtOXI1|AGC (cAMP-dependent, cGMP-dependent and protein kinase C) kinase family protein
Glyma.07G178100	-2.20765	2.68819e-39	Plastocyanin-like domain	AT2G15780.1|Symbols:|Cupredoxin superfamily protein
Glyma.07G014500	-2.19807	5.38641e-43	HAD superfamily, subfamily IIIB (Acid phosphatase)	AT4G25150.1|Symbols:|HAD superfamily, subfamily IIIB acid phosphatase
Glyma.13G305800	-2.1865	3.26641e-36	Salt stress response/antifungal	AT3G22060.1|Symbols:|Receptor-like protein kinase-related family protein
Glyma.05G065700	-2.17954	4.29064e-208	Pollen allergen; Rare lipoprotein A (RlpA)-like double-psi beta-barrel	AT4G17030.1|Symbols:ATEXLB1, EXPR, AT-EXPR, ATEXPR1, ATHEXP BETA 3.1, EXLB1|expansin-like B1
Glyma.13G186200	-2.17425	1.90332e-17	NADH:flavin oxidoreductase / NADH oxidase family	AT1G76690.1|Symbols:OPR2, ATOPR2|12-oxophytodienoate reductase 2
Glyma.01G138000	-2.15883	3.11897e-12	Plant invertase/pectin methylesterase inhibitor; Pectinesterase	AT2G45220.1|Symbols:|Plant invertase/pectin methylesterase inhibitor superfamily
Glyma.10G028900	-2.15401	1.85681e-29	Sulfate transporter family; STAS domain	AT3G51895.1|Symbols:SULTR3;1, AST12|sulfate transporter 3;1
Glyma.14G171100	-2.15086	6.33111e-49	NRDE protein	AT4G38260.1|Symbols:|Protein of unknown function (DUF833)
Glyma.04G091200	-2.14845	0.0048576	Rhamnogalacturonate lyase family	AT1G09890.1|Symbols:|Rhamnogalacturonate lyase family protein
Glyma.07G215500	-2.14766	7.23959e-11	UDP-glucoronosyl and UDP-glucosyl transferase	AT2G15490.3|Symbols:UGT73B4|UDP-glycosyltransferase 73B4
Glyma.08G092000	-2.14677	2.32367e-72	Cyclic nucleotide-binding domain; Sodium/hydrogen exchanger family	AT2G01980.1|Symbols:SOS1, ATSOS1, ATNHX7|sodium proton exchanger, putative (NHX7) (SOS1)
Glyma.08G342100	-2.14372	0.000428862	Trypsin and protease inhibitor	AT1G73260.1|Symbols:ATKTI1, KTI1|kunitz trypsin inhibitor 1
Glyma.19G076500	-2.14347	5.86655e-10	NA	AT3G27250.1|Symbols:|unknown protein
Glyma.06G191400	-2.14022	4.47886e-14	ABC transporter	AT3G47780.1|Symbols:ATATH6, ATH6|ABC2 homolog 6
Glyma.04G198100	-2.13856	5.70187e-13	Auxin responsive protein	AT5G50760.1|Symbols:|SAUR-like auxin-responsive protein family
Glyma.03G143700	-2.13397	2.09399e-194	Cytochrome P450	AT5G06900.1|Symbols:CYP93D1|cytochrome P450, family 93, subfamily D, polypeptide 1
Glyma.14G048900	-2.13307	3.41284e-16	2OG-Fe(II) oxygenase superfamily	AT1G05010.1|Symbols:EFE, ACO4, EAT1|ethylene-forming enzyme
Glyma.05G099300	-2.12403	2.39042e-19	NA	AT4G37290.1|Symbols:|unknown protein
Glyma.19G025200	-2.12129	7.70221e-31	UDP-glucoronosyl and UDP-glucosyl transferase	AT2G43840.2|Symbols:UGT74F1|UDP-glycosyltransferase 74 F1
Glyma.07G110300	-2.11969	0.00355844	UDP-glucoronosyl and UDP-glucosyl transferase	AT4G01070.1|Symbols:GT72B1, UGT72B1|UDP-Glycosyltransferase superfamily protein
Glyma.07G268400	-2.11931	7.60061e-07	C2 domain	AT5G47710.2|Symbols:|Calcium-dependent lipid-binding (CaLB domain) family protein
Glyma.07G139600	-2.11263	2.61808e-10	Glutathione S-transferase, N-terminal domain; Glutathione S-transferase, C-terminal domain	AT2G29420.1|Symbols:ATGSTU7, GST25, GSTU7|glutathione S-transferase tau 7
Glyma.09G150400	-2.10912	2.03347e-137	Legume lectin domain	AT3G16530.1|Symbols:|Legume lectin family protein
Glyma.03G129300	-2.10747	4.33588e-33	Methyltransferase domain	AT2G41380.1|Symbols:|S-adenosyl-L-methionine-dependent methyltransferases superfamily protein
Glyma.09G224800	-2.10295	2.96678e-10	Glycosyl hydrolases family 28	AT3G07970.1|Symbols:QRT2|Pectin lyase-like superfamily protein
Glyma.01G135200	-2.10148	7.96506e-85	Cytochrome P450	AT4G31940.1|Symbols:CYP82C4|cytochrome P450, family 82, subfamily C, polypeptide 4
Glyma.08G087400	-2.10058	0.00735677	VQ motif	AT4G39720.1|Symbols:|VQ motif-containing protein
Glyma.05G234600	-2.09908	6.56219e-19	Myb-like DNA-binding domain	AT1G25340.1|Symbols:MYB116, AtMYB116|myb domain protein 116
Glyma.03G069400	-2.09687	5.2212e-49	Amino acid kinase family; Aldehyde dehydrogenase family	AT3G55610.1|Symbols:P5CS2|delta 1-pyrroline-5-carboxylate synthase 2
Glyma.03G150400	-2.09657	7.7059e-06	NA	NA
Glyma.08G305000	-2.09258	0.000242106	NA	NA
Glyma.01G129200	-2.0903	1.4115e-05	NA	NA
Glyma.11G062600	-2.08413	1.46271e-91	Cytochrome P450	AT3G26300.1|Symbols:CYP71B34|cytochrome P450, family 71, subfamily B, polypeptide 34
Glyma.14G049500	-2.08162	5.23494e-143	2OG-Fe(II) oxygenase superfamily	AT1G05010.1|Symbols:EFE, ACO4, EAT1|ethylene-forming enzyme
Glyma.09G025200	-2.07652	5.00195e-08	Stress up-regulated Nod 19	AT5G61820.1|Symbols:|Stress up-regulated Nod 19
Glyma.03G053100	-2.07084	0.00228113	NB-ARC domain	AT5G36930.2|Symbols:|Disease resistance protein (TIR-NBS-LRR class) family
Glyma.10G267600	-2.06348	0.00169685	MatE	AT1G15170.1|Symbols:|MATE efflux family protein
Glyma.11G051800	-2.06184	6.82131e-46	Cytochrome P450	AT4G37340.1|Symbols:CYP81D3|cytochrome P450, family 81, subfamily D, polypeptide 3
Glyma.05G139500	-2.0609	1.93047e-13	Protein tyrosine kinase	AT1G70740.1|Symbols:|Protein kinase superfamily protein
Glyma.07G196800	-2.06086	1.71893e-36	PLAT/LH2 domain; Lipoxygenase	AT1G17420.1|Symbols:LOX3|lipoxygenase 3
Glyma.15G114700	-2.0552	0.0038008	MBOAT, membrane-bound O-acyltransferase family	AT3G51970.1|Symbols:ATSAT1, ASAT1, ATASAT1|acyl-CoA sterol acyl transferase 1
Glyma.05G133000	-2.04594	2.5138e-10	VQ motif	AT4G39720.1|Symbols:|VQ motif-containing protein
Glyma.20G201800	-2.04447	1.88455e-15	NA	NA
Glyma.14G177400	-2.04244	0.00101564	NA	AT1G22470.1|Symbols:|unknown protein
Glyma.20G010000	-2.04168	8.75537e-13	Plastocyanin-like domain	AT2G15780.1|Symbols:|Cupredoxin superfamily protein
Glyma.20G140100	-2.04038	1.64059e-18	Protein kinase domain; Salt stress response/antifungal	AT4G05200.1|Symbols:CRK25|cysteine-rich RLK (RECEPTOR-like protein kinase) 25
Glyma.13G208000	-2.0384	7.0406e-75	NA	AT1G03220.1|Symbols:|Eukaryotic aspartyl protease family protein
Glyma.01G184200	-2.03808	2.66245e-14	Peroxidase	AT1G49570.1|Symbols:|Peroxidase superfamily protein
Glyma.08G151100	-2.03533	1.0684e-21	NA	AT4G12735.1|Symbols:|unknown protein
Glyma.18G205400	-2.03372	1.1853e-28	NA	NA
Glyma.08G011500	-2.03324	0.000880608	SBP domain	AT5G50570.2|Symbols:SPL13A, SPL13|Squamosa promoter-binding protein-like (SBP domain) transcription factor family protein
Glyma.06G042200	-2.02818	0.00793282	NA	NA
Glyma.11G123400	-2.01625	3.77109e-11	NA	NA
Glyma.17G147400	-2.0096	3.12872e-79	Pollen allergen; Rare lipoprotein A (RlpA)-like double-psi beta-barrel	AT4G17030.1|Symbols:ATEXLB1, EXPR, AT-EXPR, ATEXPR1, ATHEXP BETA 3.1, EXLB1|expansin-like B1
Glyma.18G200100	-2.00939	4.26524e-09	NA	AT5G01520.1|Symbols:|RING/U-box superfamily protein
Glyma.14G147500	-2.0056	3.65355e-05	AP2 domain	AT1G21910.1|Symbols:DREB26|Integrase-type DNA-binding superfamily protein
Glyma.11G243400	-1.98909	4.57732e-07	Zinc finger, C3HC4 type (RING finger)	AT1G67856.1|Symbols:|RING/U-box superfamily protein
Glyma.02G270500	-1.97871	2.98415e-05	NA	AT1G05060.1|Symbols:|unknown protein
Glyma.18G080400	-1.9764	4.0855e-33	Cytochrome P450	AT3G26300.1|Symbols:CYP71B34|cytochrome P450, family 71, subfamily B, polypeptide 34
Glyma.10G046000	-1.97515	3.27512e-28	Exo70 exocyst complex subunit	AT3G09520.1|Symbols:ATEXO70H4, EXO70H4|exocyst subunit exo70 family protein H4
Glyma.19G231000	-1.96592	0.00024419	NA	AT1G09155.1|Symbols:AtPP2-B15, PP2-B15|phloem protein 2-B15
Glyma.10G097700	-1.96182	0.000173454	NA	NA
Glyma.05G147000	-1.95952	8.084e-11	O-methyltransferase	AT1G67980.1|Symbols:CCOAMT|caffeoyl-CoA 3-O-methyltransferase
Glyma.12G187000	-1.95841	0.000532173	NA	AT3G11600.1|Symbols:|unknown protein
Glyma.18G113400	-1.95636	7.25695e-05	Myb-like DNA-binding domain	AT2G40260.1|Symbols:|Homeodomain-like superfamily protein
Glyma.17G049900	-1.95611	1.91181e-06	NADH:flavin oxidoreductase / NADH oxidase family	AT2G06050.3|Symbols:OPR3|oxophytodienoate-reductase 3
Glyma.09G147200	-1.95608	3.05195e-10	AP2 domain	AT5G51990.1|Symbols:CBF4, DREB1D|C-repeat-binding factor 4
Glyma.19G236000	-1.94884	2.99947e-08	NA	NA
Glyma.16G097200	-1.94724	9.92398e-16	Glycosyl hydrolase family 1	AT1G02850.2|Symbols:BGLU11|beta glucosidase 11
Glyma.08G235300	-1.94691	2.82743e-29	Trypsin and protease inhibitor	AT1G17860.1|Symbols:|Kunitz family trypsin and protease inhibitor protein
Glyma.15G158200	-1.94065	2.22394e-30	VQ motif	AT4G39720.1|Symbols:|VQ motif-containing protein
Glyma.15G234700	-1.94063	1.01119e-22	UDP-glucoronosyl and UDP-glucosyl transferase	AT1G22380.1|Symbols:AtUGT85A3, UGT85A3|UDP-glucosyl transferase 85A3
Glyma.09G142200	-1.93135	1.30344e-07	Cytochrome P450	AT3G48270.1|Symbols:CYP71A26|cytochrome P450, family 71, subfamily A, polypeptide 26
Glyma.08G150500	-1.92675	1.30481e-20	Glycosyl hydrolase family 1	AT2G44480.1|Symbols:BGLU17|beta glucosidase 17
Glyma.15G122200	-1.92571	7.83452e-08	Heavy-metal-associated domain	AT4G05030.1|Symbols:|Copper transport protein family
Glyma.04G194800	-1.92531	2.62766e-16	EF hand	AT1G76650.3|Symbols:CML38|calmodulin-like 38
Glyma.03G225300	-1.92035	5.93343e-11	NA	AT3G62070.1|Symbols:|unknown protein
Glyma.07G151900	-1.91659	9.89773e-12	Glycosyl hydrolase family 1	AT1G02850.5|Symbols:BGLU11|beta glucosidase 11
Glyma.20G192600	-1.91174	0.00249083	Ras family	AT5G03530.1|Symbols:ATRAB ALPHA, ATRAB, ATRAB18B, ATRABC2A, RABC2A|RAB GTPase homolog C2A
Glyma.03G171500	-1.91168	8.38609e-08	Sodium/hydrogen exchanger family	AT3G53720.1|Symbols:ATCHX20, CHX20|cation/H+ exchanger 20
Glyma.15G256000	-1.90867	5.61072e-05	NA	AT2G32210.1|Symbols:|unknown protein
Glyma.19G014600	-1.90805	9.35415e-25	Cytochrome P450	AT4G31940.1|Symbols:CYP82C4|cytochrome P450, family 82, subfamily C, polypeptide 4
Glyma.05G065800	-1.90746	3.92153e-08	Pollen allergen; Rare lipoprotein A (RlpA)-like double-psi beta-barrel	AT4G17030.1|Symbols:ATEXLB1, EXPR, AT-EXPR, ATEXPR1, ATHEXP BETA 3.1, EXLB1|expansin-like B1
Glyma.03G173300	-1.90606	6.73527e-06	NA	AT2G37430.1|Symbols:|C2H2 and C2HC zinc fingers superfamily protein
Glyma.08G158200	-1.90425	2.48141e-06	NA	NA
Glyma.15G013900	-1.90354	1.09317e-27	WD domain, G-beta repeat	AT1G52360.1|Symbols:|Coatomer, beta' subunit
Glyma.06G163700	-1.90343	3.09041e-07	AP2 domain	AT5G61890.1|Symbols:|Integrase-type DNA-binding superfamily protein
Glyma.12G233100	-1.90169	0.000123058	Protein tyrosine kinase; Di-glucose binding within endoplasmic reticulum; Leucine Rich Repeat	AT3G14840.2|Symbols:|Leucine-rich repeat transmembrane protein kinase
Glyma.09G130900	-1.8989	0.00415129	Heavy-metal-associated domain	AT1G01490.2|Symbols:|Heavy metal transport/detoxification superfamily protein
Glyma.12G087200	-1.89625	3.95046e-08	Cytochrome P450	AT2G27690.1|Symbols:CYP94C1|cytochrome P450, family 94, subfamily C, polypeptide 1
Glyma.06G249600	-1.89552	0.00732427	NA	AT1G52855.1|Symbols:|unknown protein
Glyma.14G121200	-1.89534	2.37168e-92	Alcohol dehydrogenase GroES-like domain; Zinc-binding dehydrogenase	AT1G77120.1|Symbols:ADH1, ADH, ATADH, ATADH1|alcohol dehydrogenase 1
Glyma.10G184600	-1.89524	1.71209e-31	Potato inhibitor I family	AT2G38870.1|Symbols:|Serine protease inhibitor, potato inhibitor I-type family protein
Glyma.05G150100	-1.89325	7.24647e-08	NA	AT3G57450.1|Symbols:|unknown protein
Glyma.16G022400	-1.89158	0.00648428	NA	AT2G46600.1|Symbols:|Calcium-binding EF-hand family protein
Glyma.20G201900	-1.88887	0.00271005	NA	NA
Glyma.12G197400	-1.88128	5.58749e-31	Terpene synthase family, metal binding domain; Terpene synthase, N-terminal domain	AT4G16730.1|Symbols:TPS02|terpene synthase 02
Glyma.07G236100	-1.88098	6.52413e-11	2OG-Fe(II) oxygenase superfamily	AT1G47990.1|Symbols:ATGA2OX4, GA2OX4|gibberellin 2-oxidase 4
Glyma.15G071200	-1.88062	1.48664e-202	Protein of unknown function (DUF B2219); Common central domain of tyrosinase; Polyphenol oxidase middle domain	NA
Glyma.03G147700	-1.87952	5.33602e-49	Dirigent-like protein	AT5G42500.1|Symbols:|Disease resistance-responsive (dirigent-like protein) family protein
Glyma.14G049300	-1.87815	0.00105572	NA	AT5G04730.1|Symbols:|Ankyrin-repeat containing protein
Glyma.13G095700	-1.86997	1.09273e-05	NA	AT5G57510.1|Symbols:|unknown protein
Glyma.18G127900	-1.86731	1.5934e-16	TIR domain	AT4G16990.1|Symbols:RLM3|disease resistance protein (TIR-NBS class), putative
Glyma.13G242300	-1.8663	0.00430133	Polyphenol oxidase middle domain; Protein of unknown function (DUF B2219); Common central domain of tyrosinase	NA
Glyma.05G129200	-1.8559	2.2303e-09	NA	AT5G46295.1|Symbols:|unknown protein
Glyma.19G222900	-1.85105	5.78611e-05	Rare lipoprotein A (RlpA)-like double-psi beta-barrel; Pollen allergen	AT4G01630.1|Symbols:ATEXPA17, ATEXP17, ATHEXP ALPHA 1.13, EXPA17|expansin A17
Glyma.07G140100	-1.84554	1.45222e-06	Glutathione S-transferase, N-terminal domain; Glutathione S-transferase, C-terminal domain	AT2G29490.1|Symbols:ATGSTU1, GST19, GSTU1|glutathione S-transferase TAU 1
Glyma.06G072000	-1.84538	6.37674e-06	NA	AT2G25625.2|Symbols:|unknown protein
Glyma.04G058100	-1.84299	3.15943e-68	Transferase family	AT2G19070.1|Symbols:SHT|spermidine hydroxycinnamoyl transferase
Glyma.08G191300	-1.8384	4.05079e-06	NA	AT4G33050.3|Symbols:EDA39|calmodulin-binding family protein
Glyma.10G212300	-1.83784	0.00525705	Mlo family	AT1G61560.1|Symbols:MLO6, ATMLO6|Seven transmembrane MLO family protein
Glyma.06G006500	-1.83597	0.00178338	Auxin responsive protein	AT4G38840.1|Symbols:|SAUR-like auxin-responsive protein family
Glyma.20G032500	-1.82724	1.59094e-23	SPX domain; EXS family	AT1G14040.1|Symbols:|EXS (ERD1/XPR1/SYG1) family protein
Glyma.06G088400	-1.82213	2.78924e-05	Protein kinase domain; Leucine Rich Repeat; Leucine rich repeat N-terminal domain	AT5G25930.1|Symbols:|Protein kinase family protein with leucine-rich repeat domain
Glyma.17G030400	-1.82205	2.52582e-205	Pathogenesis-related protein Bet v I family	AT1G24020.2|Symbols:MLP423|MLP-like protein 423
Glyma.20G091300	-1.82135	0.00643485	Proteolipid membrane potential modulator	AT3G05890.1|Symbols:RCI2B|Low temperature and salt responsive protein family
Glyma.05G127600	-1.82035	1.7657e-17	WRKY DNA -binding domain	AT4G18170.1|Symbols:WRKY28, ATWRKY28|WRKY DNA-binding protein 28
Glyma.10G188900	-1.81995	2.7491e-09	NA	NA
Glyma.08G211000	-1.81756	2.11536e-10	Cotton fibre expressed protein	AT1G15385.1|Symbols:|unknown protein
Glyma.03G098600	-1.81724	8.56393e-16	Zinc-binding dehydrogenase	AT5G16970.1|Symbols:AT-AER, AER|alkenal reductase
Glyma.13G247000	-1.81642	3.96258e-08	Wound-induced protein	AT4G10265.1|Symbols:|Wound-responsive family protein
Glyma.09G131100	-1.80883	0.00079292	Heavy-metal-associated domain	AT1G01490.2|Symbols:|Heavy metal transport/detoxification superfamily protein
Glyma.11G085400	-1.80877	4.28431e-08	Protein kinase domain	AT4G35600.1|Symbols:CONNEXIN 32|Protein kinase superfamily protein
Glyma.08G174900	-1.80873	3.14337e-12	Glutathione S-transferase, C-terminal domain; Glutathione S-transferase, N-terminal domain	AT1G78380.1|Symbols:ATGSTU19, GST8, GSTU19|glutathione S-transferase TAU 19
Glyma.09G255000	-1.80725	5.11315e-13	Aminotransferase class I and II	AT3G61510.1|Symbols:ACS1, AT-ACS1|ACC synthase 1
Glyma.13G330800	-1.8069	1.27574e-06	Glycosyl hydrolases family 18	NA
Glyma.07G154700	-1.80514	1.23167e-05	NA	NA
Glyma.03G250600	-1.805	1.20358e-08	Myb-like DNA-binding domain	AT3G23250.1|Symbols:MYB15, ATY19, ATMYB15|myb domain protein 15
Glyma.15G232200	-1.80472	0.00820732	VQ motif	AT3G56710.1|Symbols:SIB1|sigma factor binding protein 1
Glyma.04G182600	-1.79446	1.58931e-14	Helix-loop-helix DNA-binding domain	AT4G20970.1|Symbols:|basic helix-loop-helix (bHLH) DNA-binding superfamily protein
Glyma.18G022000	-1.79222	1.83439e-26	Hypoxia induced protein conserved region	AT3G05550.1|Symbols:|Hypoxia-responsive family protein
Glyma.06G295300	-1.78997	0.00292626	AP2 domain	AT4G28140.1|Symbols:|Integrase-type DNA-binding superfamily protein
Glyma.20G018200	-1.78874	4.69559e-07	Glycosyl hydrolases family 17	AT4G18340.1|Symbols:|Glycosyl hydrolase superfamily protein
Glyma.10G192900	-1.78752	4.15142e-66	Glutathione S-transferase, N-terminal domain; Glutathione S-transferase, C-terminal domain	AT3G09270.1|Symbols:ATGSTU8, GSTU8|glutathione S-transferase TAU 8
Glyma.02G058000	-1.78438	1.5464e-62	Sugar (and other) transporter	AT2G18480.1|Symbols:|Major facilitator superfamily protein
Glyma.17G053600	-1.78334	7.90918e-28	NA	AT4G33050.3|Symbols:EDA39|calmodulin-binding family protein
Glyma.16G179100	-1.7827	5.44794e-23	Fatty acid hydroxylase superfamily	AT4G25700.1|Symbols:BETA-OHASE 1, B1, chy1, BCH1|beta-hydroxylase 1
Glyma.13G229300	-1.78092	0.000396532	Polyketide cyclase / dehydrase and lipid transport	AT2G40330.1|Symbols:PYL6, RCAR9|PYR1-like 6
Glyma.08G050400	-1.77885	1.1503e-25	2OG-Fe(II) oxygenase superfamily	AT1G05010.1|Symbols:EFE, ACO4, EAT1|ethylene-forming enzyme
Glyma.17G214700	-1.77539	0.00194292	Protein kinase domain	AT5G38260.1|Symbols:|Protein kinase superfamily protein
Glyma.02G157900	-1.77496	2.77537e-08	NA	AT4G39235.1|Symbols:|unknown protein
Glyma.18G119200	-1.77465	1.10108e-11	NA	NA
Glyma.17G214200	-1.77217	5.15434e-06	Protein kinase domain	AT1G34300.1|Symbols:|lectin protein kinase family protein
Glyma.11G162100	-1.76753	4.54511e-15	Peroxidase	AT5G05340.1|Symbols:|Peroxidase superfamily protein
Glyma.12G149100	-1.76735	8.68883e-17	No apical meristem (NAM) protein	AT4G27410.2|Symbols:RD26, ANAC072|NAC (No Apical Meristem) domain transcriptional regulator superfamily protein
Glyma.16G146700	-1.76722	0.00116556	Mitochondrial carrier protein	AT5G14040.1|Symbols:PHT3;1|phosphate transporter 3;1
Glyma.03G221400	-1.76388	3.47527e-07	AMP-binding enzyme	AT2G47240.2|Symbols:LACS1|AMP-dependent synthetase and ligase family protein
Glyma.10G290200	-1.75588	1.77397e-05	NA	AT2G37430.1|Symbols:|C2H2 and C2HC zinc fingers superfamily protein
Glyma.16G133500	-1.75004	3.6962e-27	ATPase family associated with various cellular activities (AAA)	AT5G17760.1|Symbols:|P-loop containing nucleoside triphosphate hydrolases superfamily protein
Glyma.U027300	-1.74911	9.28167e-126	Multicopper oxidase; Multicopper oxidase; Multicopper oxidase	AT3G09220.1|Symbols:LAC7|laccase 7
Glyma.18G148700	-1.74769	3.77464e-14	Transketolase, pyrimidine binding domain; Dehydrogenase E1 component; Transketolase, C-terminal domain	AT4G15560.1|Symbols:CLA1, DEF, CLA, DXS, DXPS2|Deoxyxylulose-5-phosphate synthase
Glyma.08G306500	-1.7476	6.80953e-08	Transferase family	AT1G78990.1|Symbols:|HXXXD-type acyl-transferase family protein
Glyma.05G162500	-1.74671	2.12605e-07	Major intrinsic protein	AT4G18910.1|Symbols:NIP1;2, NLM2, ATNLM2|NOD26-like intrinsic protein 1;2
Glyma.17G166600	-1.74001	1.82799e-25	NA	AT2G23270.1|Symbols:|unknown protein
Glyma.13G234700	-1.73898	1.10807e-06	No apical meristem (NAM) protein	AT4G28500.1|Symbols:ANAC073, SND2, NAC073|NAC domain containing protein 73
Glyma.07G076300	-1.73886	0.00272018	C2 domain	NA
Glyma.06G096800	-1.73671	0.000772378	NA	AT4G38060.2|Symbols:|unknown protein
Glyma.03G043400	-1.73633	0.000555647	NA	NA
Glyma.15G107100	-1.73508	6.37132e-09	MatE	AT3G21690.1|Symbols:|MATE efflux family protein
Glyma.15G250100	-1.73362	4.50902e-13	Retinal pigment epithelial membrane protein	AT3G14440.1|Symbols:NCED3, ATNCED3, STO1, SIS7|nine-cis-epoxycarotenoid dioxygenase 3
Glyma.19G248100	-1.73074	1.32367e-13	Myb-like DNA-binding domain	AT2G31180.1|Symbols:ATMYB14, MYB14AT, MYB14|myb domain protein 14
Glyma.03G157700	-1.73028	2.25797e-30	Cation transporting ATPase, C-terminus; haloacid dehalogenase-like hydrolase; Cation transporter/ATPase, N-terminus; E1-E2 ATPase	AT3G63380.1|Symbols:|ATPase E1-E2 type family protein / haloacid dehalogenase-like hydrolase family protein
Glyma.03G168000	-1.72428	6.53539e-62	ABC-2 type transporter; Plant PDR ABC transporter associated; ABC transporter	AT1G15520.1|Symbols:PDR12, ATPDR12, ABCG40, ATABCG40|pleiotropic drug resistance 12
Glyma.02G006200	-1.72406	1.02892e-10	AP2 domain	AT3G23240.1|Symbols:ERF1, ATERF1|ethylene response factor 1
Glyma.07G220000	-1.72365	0.00516481	Glycosyl hydrolases family 17	AT4G18340.1|Symbols:|Glycosyl hydrolase superfamily protein
Glyma.13G085800	-1.72237	1.91586e-07	NA	NA
Glyma.17G064300	-1.72143	1.06002e-05	NA	AT5G57510.1|Symbols:|unknown protein
Glyma.18G205100	-1.72077	1.30265e-17	GRAS domain family	AT5G66770.1|Symbols:|GRAS family transcription factor
Glyma.10G282200	-1.72034	4.98104e-19	FAD binding domain	AT5G05320.1|Symbols:|FAD/NAD(P)-binding oxidoreductase family protein
Glyma.13G032700	-1.7203	2.19572e-05	Protein kinase domain	AT1G66910.1|Symbols:|Protein kinase superfamily protein
Glyma.18G293500	-1.71834	4.3701e-10	NA	AT2G47485.1|Symbols:|unknown protein
Glyma.10G181000	-1.71561	0.0005108	NA	AT4G14380.1|Symbols:|unknown protein
Glyma.09G072000	-1.71418	1.99243e-07	AP2 domain	AT1G19210.1|Symbols:|Integrase-type DNA-binding superfamily protein
Glyma.11G063200	-1.71403	0.000103381	LysM domain; Protein kinase domain	AT2G23770.1|Symbols:|protein kinase family protein / peptidoglycan-binding LysM domain-containing protein
Glyma.07G117700	-1.71382	3.99493e-14	Protein kinase domain; Protein tyrosine kinase	AT2G32800.1|Symbols:AP4.3A|protein kinase family protein
Glyma.11G157200	-1.70968	0.00177176	EF hand	AT3G50770.1|Symbols:CML41|calmodulin-like 41
Glyma.13G133100	-1.70552	1.24318e-16	NA	AT3G53600.1|Symbols:|C2H2-type zinc finger family protein
Glyma.02G265900	-1.69903	1.34211e-13	NA	AT2G44310.1|Symbols:|Calcium-binding EF-hand family protein
Glyma.09G277900	-1.69628	6.26442e-40	Peroxidase	AT5G05340.1|Symbols:|Peroxidase superfamily protein
Glyma.01G244000	-1.68857	0.000111166	NA	NA
Glyma.16G076600	-1.68768	0.00705326	Cytochrome P450	AT4G19230.1|Symbols:CYP707A1|cytochrome P450, family 707, subfamily A, polypeptide 1
Glyma.12G048000	-1.68597	3.88814e-10	NA	AT2G15960.1|Symbols:|unknown protein
Glyma.16G188800	-1.68261	4.85868e-28	NA	AT2G44300.1|Symbols:|Bifunctional inhibitor/lipid-transfer protein/seed storage 2S albumin superfamily protein
Glyma.11G119200	-1.68149	4.61403e-08	Protein of unknown function (DUF2775)	AT1G49310.1|Symbols:|unknown protein
Glyma.15G252200	-1.6804	2.71996e-42	Glutathione S-transferase, C-terminal domain; Glutathione S-transferase, N-terminal domain	AT1G78380.1|Symbols:ATGSTU19, GST8, GSTU19|glutathione S-transferase TAU 19
Glyma.13G213200	-1.67727	0.0010871	Sugar (and other) transporter	AT5G18840.1|Symbols:|Major facilitator superfamily protein
Glyma.06G300200	-1.67509	1.25953e-09	Myb-like DNA-binding domain	AT2G31180.1|Symbols:ATMYB14, MYB14AT, MYB14|myb domain protein 14
Glyma.10G295200	-1.6724	4.21661e-29	NA	AT5G22990.1|Symbols:|C2H2-like zinc finger protein
Glyma.08G230400	-1.67166	2.63258e-06	Pathogenesis-related protein Bet v I family	AT1G70890.1|Symbols:MLP43|MLP-like protein 43
Glyma.13G138300	-1.67013	2.78077e-183	Peroxidase	AT2G37130.1|Symbols:|Peroxidase superfamily protein
Glyma.09G048900	-1.66842	1.32373e-69	Cytochrome P450	AT4G37340.1|Symbols:CYP81D3|cytochrome P450, family 81, subfamily D, polypeptide 3
Glyma.08G180300	-1.66565	1.92004e-10	DnaJ domain	AT4G13830.2|Symbols:J20|DNAJ-like 20
Glyma.09G138100	-1.66108	2.40336e-51	AMP-binding enzyme	AT3G48990.1|Symbols:|AMP-dependent synthetase and ligase family protein
Glyma.05G137800	-1.65983	2.79675e-05	2OG-Fe(II) oxygenase superfamily	AT1G17020.1|Symbols:SRG1, ATSRG1|senescence-related gene 1
Glyma.08G044300	-1.6557	0.0014279	Protein tyrosine kinase	AT5G38260.1|Symbols:|Protein kinase superfamily protein
Glyma.07G178200	-1.65432	0.000219818	Plastocyanin-like domain	AT2G15780.1|Symbols:|Cupredoxin superfamily protein
Glyma.12G045600	-1.6542	0.00419931	Protein of unknown function (DUF677)	AT4G34320.1|Symbols:|Protein of unknown function (DUF677)
Glyma.06G220800	-1.65204	3.56372e-07	Plastocyanin-like domain	AT5G20230.1|Symbols:ATBCB, BCB, SAG14|blue-copper-binding protein
Glyma.12G234800	-1.65103	5.42664e-121	Trypsin and protease inhibitor	AT1G17860.1|Symbols:|Kunitz family trypsin and protease inhibitor protein
Glyma.08G299000	-1.65075	1.63359e-09	NA	AT1G26920.1|Symbols:|unknown protein
Glyma.13G033900	-1.64987	1.30053e-05	Protein tyrosine kinase	AT5G38260.1|Symbols:|Protein kinase superfamily protein
Glyma.07G243500	-1.64654	4.57882e-163	Pathogenesis-related protein Bet v I family	NA
Glyma.03G160400	-1.64455	1.30541e-07	NA	NA
Glyma.01G241700	-1.64182	1.08964e-09	NA	AT3G19660.1|Symbols:|unknown protein
Glyma.18G055600	-1.62285	5.04145e-24	Peroxidase	AT5G05340.1|Symbols:|Peroxidase superfamily protein
Glyma.U009600	-1.62047	1.55045e-09	U-box domain	AT3G11840.1|Symbols:PUB24|plant U-box 24
Glyma.13G249700	-1.61311	1.03451e-77	NADPH-dependent FMN reductase	AT4G27270.1|Symbols:|Quinone reductase family protein
Glyma.10G165800	-1.6105	4.01282e-10	Myb-like DNA-binding domain	AT3G23250.1|Symbols:MYB15, ATY19, ATMYB15|myb domain protein 15
Glyma.10G010400	-1.60784	0.000335388	Myb-like DNA-binding domain	AT2G47190.1|Symbols:ATMYB2, MYB2|myb domain protein 2
Glyma.09G193500	-1.60658	3.9499e-05	Xyloglucan endo-transglycosylase (XET) C-terminus; Glycosyl hydrolases family 16	AT4G28850.1|Symbols:XTH26, ATXTH26|xyloglucan endotransglucosylase/hydrolase 26
Glyma.20G140000	-1.60601	8.58883e-09	Salt stress response/antifungal	AT4G23170.1|Symbols:EP1, CRK9|receptor-like protein kinase-related family protein
Glyma.17G069500	-1.60436	4.7863e-72	NA	NA
Glyma.18G287000	-1.60156	3.68055e-16	NB-ARC domain	AT3G46530.1|Symbols:RPP13|NB-ARC domain-containing disease resistance protein
Glyma.13G206500	-1.59734	0.00137807	Adenosine/AMP deaminase	AT4G04880.1|Symbols:|adenosine/AMP deaminase family protein
Glyma.10G180500	-1.59386	5.95243e-40	NA	AT1G03220.1|Symbols:|Eukaryotic aspartyl protease family protein
Glyma.12G012200	-1.59356	5.67774e-05	Glycosyl hydrolases family 28	AT3G07970.1|Symbols:QRT2|Pectin lyase-like superfamily protein
Glyma.03G135800	-1.59289	8.19665e-19	HSF-type DNA-binding	AT2G41690.1|Symbols:AT-HSFB3, HSFB3|heat shock transcription factor B3
Glyma.03G057100	-1.59175	0.000757006	2OG-Fe(II) oxygenase superfamily	AT5G05600.1|Symbols:|2-oxoglutarate (2OG) and Fe(II)-dependent oxygenase superfamily protein
Glyma.13G329900	-1.59143	2.15018e-12	NA	NA
Glyma.12G238300	-1.58798	1.53891e-06	NA	NA
Glyma.02G002100	-1.5798	1.48048e-09	EF hand	AT4G14640.1|Symbols:CAM8, AtCML8|calmodulin 8
Glyma.18G239100	-1.57885	2.08684e-08	SAM dependent carboxyl methyltransferase	AT4G36470.1|Symbols:|S-adenosyl-L-methionine-dependent methyltransferases superfamily protein
Glyma.06G300100	-1.57554	0.00180808	Myb-like DNA-binding domain	AT2G31180.1|Symbols:ATMYB14, MYB14AT, MYB14|myb domain protein 14
Glyma.12G110100	-1.57174	1.40224e-18	NA	NA
Glyma.11G106900	-1.57156	2.83747e-06	Senescence-associated protein	AT2G17840.1|Symbols:ERD7|Senescence/dehydration-associated protein-related
Glyma.06G020800	-1.57008	7.3412e-08	NA	AT1G76070.1|Symbols:|unknown protein
Glyma.10G132200	-1.56826	7.2872e-05	Myb-like DNA-binding domain	AT4G13480.1|Symbols:AtMYB79, MYB79|myb domain protein 79
Glyma.12G072000	-1.56386	0.00055945	Protein of unknown function DUF260	AT1G07900.1|Symbols:LBD1|LOB domain-containing protein 1
Glyma.18G158400	-1.56357	7.1021e-44	ABC transporter transmembrane region; ABC transporter	AT3G13080.1|Symbols:ATMRP3, MRP3, ABCC3|multidrug resistance-associated protein 3
Glyma.19G021900	-1.56333	0.000943439	No apical meristem (NAM) protein	AT5G39820.1|Symbols:anac094, NAC094|NAC domain containing protein 94
Glyma.02G239100	-1.56326	2.02673e-17	Late embryogenesis abundant protein	AT1G65690.1|Symbols:|Late embryogenesis abundant (LEA) hydroxyproline-rich glycoprotein family
Glyma.14G081300	-1.56302	0.00450332	Patatin-like phospholipase	AT2G26560.1|Symbols:PLP2, PLA IIA, PLA2A|phospholipase A 2A
Glyma.13G352700	-1.56285	0.000848377	Protein kinase domain; Leucine Rich Repeat	AT4G29990.1|Symbols:|Leucine-rich repeat transmembrane protein kinase protein
Glyma.08G133100	-1.56175	9.93941e-08	NA	NA
Glyma.19G076800	-1.56119	1.19756e-30	Transmembrane amino acid transporter protein	AT5G40780.1|Symbols:LHT1|lysine histidine transporter 1
Glyma.13G266900	-1.56115	0.00383779	NA	NA
Glyma.12G049300	-1.55899	8.529e-19	NA	AT4G28460.1|Symbols:|unknown protein
Glyma.05G101300	-1.55751	7.10626e-14	GH3 auxin-responsive promoter	AT4G37390.1|Symbols:YDK1, GH3.2, BRU6, GH3-2, AUR3|Auxin-responsive GH3 family protein
Glyma.02G024600	-1.55668	1.70587e-30	Glutathione S-transferase, N-terminal domain; Glutathione S-transferase, C-terminal domain	AT1G10360.1|Symbols:ATGSTU18, GST29, GSTU18|glutathione S-transferase TAU 18
Glyma.05G002700	-1.5558	0.000724436	No apical meristem (NAM) protein	AT3G01600.1|Symbols:anac044, NAC044|NAC domain containing protein 44
Glyma.18G294400	-1.55573	0.000201519	Protein kinase domain	AT4G23140.1|Symbols:CRK6|cysteine-rich RLK (RECEPTOR-like protein kinase) 6
Glyma.13G220300	-1.55336	0.00958681	NA	AT4G03620.1|Symbols:|myosin heavy chain-related
Glyma.17G067200	-1.55265	0.00049837	Ligand-gated ion channel; Bacterial extracellular solute-binding proteins, family 3	AT5G11210.1|Symbols:ATGLR2.5, GLR2.5|glutamate receptor 2.5
Glyma.01G134600	-1.55184	8.07839e-18	UbiA prenyltransferase family	AT2G18950.1|Symbols:HPT1, TPT1, ATHPT, VTE2|homogentisate phytyltransferase 1
Glyma.15G211500	-1.54793	6.90934e-44	Trypsin and protease inhibitor	AT1G17860.1|Symbols:|Kunitz family trypsin and protease inhibitor protein
Glyma.16G026400	-1.54695	1.96524e-13	WRKY DNA -binding domain	AT2G46400.1|Symbols:WRKY46, ATWRKY46|WRKY DNA-binding protein 46
Glyma.17G030000	-1.54596	1.9409e-20	Pathogenesis-related protein Bet v I family	AT1G24020.2|Symbols:MLP423|MLP-like protein 423
Glyma.09G049200	-1.53577	6.72582e-51	Cytochrome P450	AT4G37340.1|Symbols:CYP81D3|cytochrome P450, family 81, subfamily D, polypeptide 3
Glyma.02G009300	-1.53535	5.76022e-17	Glycosyl hydrolases family 28	AT1G02460.1|Symbols:|Pectin lyase-like superfamily protein
Glyma.01G090400	-1.53413	2.29994e-21	NA	AT3G25655.1|Symbols:IDL1|inflorescence deficient in abscission (IDA)-like 1
Glyma.01G216600	-1.53295	1.708e-05	MatE	AT4G23030.1|Symbols:|MATE efflux family protein
Glyma.01G108200	-1.53252	1.8167e-71	Multicopper oxidase; Multicopper oxidase; Multicopper oxidase	AT3G09220.1|Symbols:LAC7|laccase 7
Glyma.05G195000	-1.52516	1.56002e-26	No apical meristem (NAM) protein	AT1G01720.1|Symbols:ATAF1, ANAC002|NAC (No Apical Meristem) domain transcriptional regulator superfamily protein
Glyma.08G352200	-1.52415	8.99898e-11	PAN-like domain; D-mannose binding lectin; S-locus glycoprotein family; Protein tyrosine kinase	AT1G11330.1|Symbols:|S-locus lectin protein kinase family protein
Glyma.19G159900	-1.52288	2.41173e-30	Cation transporting ATPase, C-terminus; haloacid dehalogenase-like hydrolase; Cation transporter/ATPase, N-terminus; E1-E2 ATPase	AT3G63380.1|Symbols:|ATPase E1-E2 type family protein / haloacid dehalogenase-like hydrolase family protein
Glyma.13G032000	-1.52121	6.05303e-09	Protein kinase domain	AT1G11050.1|Symbols:|Protein kinase superfamily protein
Glyma.07G122900	-1.51856	4.20596e-18	NA	NA
Glyma.07G140000	-1.51739	5.65876e-13	Glutathione S-transferase, N-terminal domain; Glutathione S-transferase, C-terminal domain	AT3G09270.1|Symbols:ATGSTU8, GSTU8|glutathione S-transferase TAU 8
Glyma.08G011300	-1.51662	0.000156522	WRKY DNA -binding domain	AT5G13080.1|Symbols:WRKY75, ATWRKY75|WRKY DNA-binding protein 75
Glyma.14G171700	-1.51539	1.89629e-23	Trehalose-phosphatase	AT5G10100.1|Symbols:TPPI|Haloacid dehalogenase-like hydrolase (HAD) superfamily protein
Glyma.15G129200	-1.51149	1.44059e-51	Peroxidase	AT5G06730.1|Symbols:|Peroxidase superfamily protein
Glyma.15G065100	-1.51023	3.08609e-21	S-locus glycoprotein family; Domain of unknown function (DUF3403); PAN-like domain; D-mannose binding lectin; Protein tyrosine kinase	AT4G21380.1|Symbols:ARK3, RK3|receptor kinase 3
Glyma.17G036300	-1.50994	1.5031e-14	Plant invertase/pectin methylesterase inhibitor	AT1G47960.1|Symbols:C/VIF1, ATC/VIF1|cell wall / vacuolar inhibitor of fructosidase 1
Glyma.11G064800	-1.509	1.79885e-08	Homeobox domain	AT4G36740.1|Symbols:HB-5, ATHB40, HB40|homeobox protein 40
Glyma.14G179200	-1.50784	1.85645e-17	Serine hydrolase (FSH1)	AT4G24380.1|Symbols:|alpha/beta-Hydrolases superfamily protein (TAIR:AT5G65400.1)
Glyma.15G028400	-1.5068	1.67018e-06	NA	AT5G67550.1|Symbols:|unknown protein
Glyma.02G130600	-1.50631	0.000721013	ABC transporter; ABC-2 type transporter	AT3G25620.2|Symbols:|ABC-2 type transporter family protein
Glyma.13G093300	-1.50616	7.03503e-20	Ligand-gated ion channel; Bacterial extracellular solute-binding proteins, family 3	AT2G29110.1|Symbols:ATGLR2.8, GLR2.8|glutamate receptor 2.8
Glyma.05G082400	-1.50516	6.45971e-07	NB-ARC domain; Leucine Rich Repeat	AT5G66900.1|Symbols:|Disease resistance protein (CC-NBS-LRR class) family
Glyma.12G033400	-1.50488	0.00535228	NA	AT4G35070.2|Symbols:|SBP (S-ribonuclease binding protein) family protein
Glyma.11G124700	-1.50029	5.5409e-08	NA	AT4G28460.1|Symbols:|unknown protein
Glyma.03G134800	-1.50022	6.93367e-22	Protein of unknown function (DUF563)	AT2G41640.1|Symbols:|Glycosyltransferase family 61 protein
Glyma.13G226600	-1.49916	5.91801e-09	NA	AT1G29290.1|Symbols:|unknown protein
Glyma.14G015100	-1.49867	0.00092694	Cytochrome P450	AT5G25120.1|Symbols:CYP71B11|ytochrome p450, family 71, subfamily B, polypeptide 11
Glyma.17G214500	-1.49805	0.000884075	Protein kinase domain	AT5G38260.1|Symbols:|Protein kinase superfamily protein
Glyma.19G016100	-1.49756	2.53059e-18	Glycosyl transferase family 8	AT1G70090.2|Symbols:GATL9, LGT8|glucosyl transferase family 8
Glyma.09G111900	-1.49523	2.33226e-06	Fatty acid desaturase; Domain of unknown function (DUF3474)	AT3G12120.2|Symbols:FAD2|fatty acid desaturase 2
Glyma.06G010500	-1.49454	0.000424536	CRAL/TRIO domain; CRAL/TRIO, N-terminal domain	AT2G21540.2|Symbols:ATSFH3, SFH3|SEC14-like 3
Glyma.07G161500	-1.4942	1.06402e-06	PPR repeat	AT5G18950.1|Symbols:|Tetratricopeptide repeat (TPR)-like superfamily protein
Glyma.09G253900	-1.49417	0.000544092	SAM dependent carboxyl methyltransferase	AT4G36470.1|Symbols:|S-adenosyl-L-methionine-dependent methyltransferases superfamily protein
Glyma.19G174200	-1.4901	0.000591403	NA	AT2G37430.1|Symbols:|C2H2 and C2HC zinc fingers superfamily protein
Glyma.19G009000	-1.48627	7.07616e-99	D-isomer specific 2-hydroxyacid dehydrogenase, NAD binding domain; D-isomer specific 2-hydroxyacid dehydrogenase, catalytic domain	AT5G14780.1|Symbols:FDH|formate dehydrogenase
Glyma.12G188900	-1.48605	1.1165e-09	U-box domain	AT2G35930.1|Symbols:PUB23|plant U-box 23
Glyma.16G136600	-1.48587	5.21653e-09	TIR domain; Leucine Rich Repeat; NB-ARC domain	AT5G18360.1|Symbols:|Disease resistance protein (TIR-NBS-LRR class) family
Glyma.03G016400	-1.48017	0.00705416	C2 domain	AT2G45760.1|Symbols:BAP2, BAL|BON association protein 2
Glyma.14G188500	-1.47986	6.75864e-06	NA	AT5G24610.1|Symbols:|unknown protein
Glyma.19G164300	-1.47888	5.5529e-07	Sugar (and other) transporter	AT3G54700.1|Symbols:PHT1;7|phosphate transporter 1;7
Glyma.17G151700	-1.47843	7.03671e-10	Rare lipoprotein A (RlpA)-like double-psi beta-barrel; Pollen allergen	AT4G17030.1|Symbols:ATEXLB1, EXPR, AT-EXPR, ATEXPR1, ATHEXP BETA 3.1, EXLB1|expansin-like B1
Glyma.09G168300	-1.47785	7.23973e-17	Glycosyl hydrolase family 14	AT3G23920.1|Symbols:BAM1, BMY7, TR-BAMY|beta-amylase 1
Glyma.08G260500	-1.47772	6.17409e-07	Regulator of Vps4 activity in the MVB pathway	AT1G13340.1|Symbols:|Regulator of Vps4 activity in the MVB pathway protein
Glyma.11G129700	-1.47762	6.35159e-52	Glycosyl hydrolase family 1	AT2G44480.1|Symbols:BGLU17|beta glucosidase 17
Glyma.08G162700	-1.47678	4.69559e-07	Peroxidase	AT1G30870.1|Symbols:|Peroxidase superfamily protein
Glyma.17G042300	-1.47622	0.000248986	WRKY DNA -binding domain	AT4G04450.1|Symbols:WRKY42, AtWRKY42|WRKY family transcription factor
Glyma.02G222800	-1.47212	2.31475e-06	NA	NA
Glyma.17G039900	-1.46961	4.53611e-05	Protein of unknown function, DUF538	AT4G24130.1|Symbols:|Protein of unknown function, DUF538
Glyma.01G157700	-1.46744	2.93515e-08	Membrane transport protein	AT5G65980.1|Symbols:|Auxin efflux carrier family protein
Glyma.09G049300	-1.46694	8.30673e-48	Cytochrome P450	AT4G37340.1|Symbols:CYP81D3|cytochrome P450, family 81, subfamily D, polypeptide 3
Glyma.08G021800	-1.4666	9.90309e-06	NA	AT5G41810.2|Symbols:|unknown protein
Glyma.08G277000	-1.4658	2.02667e-41	Transketolase, C-terminal domain; Dehydrogenase E1 component; Transketolase, pyrimidine binding domain	AT4G15560.1|Symbols:CLA1, DEF, CLA, DXS, DXPS2|Deoxyxylulose-5-phosphate synthase
Glyma.02G151700	-1.46337	2.14144e-07	Peroxidase	AT1G05260.1|Symbols:RCI3, RCI3A|Peroxidase superfamily protein
Glyma.17G133100	-1.46126	0.00162549	Pollen allergen; Rare lipoprotein A (RlpA)-like double-psi beta-barrel	AT1G12560.1|Symbols:ATEXPA7, EXP7, ATEXP7, ATHEXP ALPHA 1.26, EXPA7|expansin A7
Glyma.13G302700	-1.46053	2.31735e-05	Transferase family	AT1G03495.1|Symbols:|HXXXD-type acyl-transferase family protein
Glyma.13G176200	-1.46015	0.00529842	Hsp20/alpha crystallin family	AT1G53540.1|Symbols:|HSP20-like chaperones superfamily protein
Glyma.02G092300	-1.45871	3.69463e-11	NA	AT2G44310.1|Symbols:|Calcium-binding EF-hand family protein
Glyma.08G246700	-1.4583	5.10245e-72	O-methyltransferase; Dimerisation domain	AT4G35160.1|Symbols:|O-methyltransferase family protein
Glyma.17G011100	-1.45731	1.98228e-09	Stigma-specific protein, Stig1	AT1G11925.1|Symbols:|Stigma-specific Stig1 family protein
Glyma.12G025100	-1.45719	0.00371101	EMG1/NEP1 methyltransferase	AT3G57000.1|Symbols:|nucleolar essential protein-related
Glyma.04G099200	-1.45553	6.47945e-13	NA	AT1G22470.1|Symbols:|unknown protein
Glyma.01G214400	-1.45433	2.03901e-08	Pollen allergen; Rare lipoprotein A (RlpA)-like double-psi beta-barrel	AT1G12560.1|Symbols:ATEXPA7, EXP7, ATEXP7, ATHEXP ALPHA 1.26, EXPA7|expansin A7
Glyma.01G210400	-1.45206	9.43124e-47	lactate/malate dehydrogenase, alpha/beta C-terminal domain; lactate/malate dehydrogenase, NAD binding domain	AT4G17260.1|Symbols:|Lactate/malate dehydrogenase family protein
Glyma.13G285300	-1.45178	3.72591e-44	Cytochrome P450	AT4G31940.1|Symbols:CYP82C4|cytochrome P450, family 82, subfamily C, polypeptide 4
Glyma.13G157400	-1.45127	1.16956e-16	NA	AT5G25240.1|Symbols:|unknown protein
Glyma.03G165800	-1.45064	4.93345e-06	Leucine Rich Repeat; Leucine rich repeat N-terminal domain; Protein kinase domain	AT4G08850.1|Symbols:|Leucine-rich repeat receptor-like protein kinase family protein
Glyma.02G128800	-1.4472	2.3865e-73	Protein of unknown function (DUF1262)	AT1G13480.1|Symbols:|Protein of unknown function (DUF1262)
Glyma.15G159900	-1.44596	0.00271301	NA	NA
Glyma.10G223200	-1.43987	3.39525e-11	AP2 domain	AT5G61890.1|Symbols:|Integrase-type DNA-binding superfamily protein
Glyma.19G137800	-1.43894	1.2144e-30	HSF-type DNA-binding	AT2G41690.1|Symbols:AT-HSFB3, HSFB3|heat shock transcription factor B3
Glyma.02G268000	-1.43737	2.80967e-06	2OG-Fe(II) oxygenase superfamily	AT1G05010.1|Symbols:EFE, ACO4, EAT1|ethylene-forming enzyme
Glyma.12G054200	-1.43724	1.78438e-18	Glycosyl hydrolase family 1	AT2G44480.1|Symbols:BGLU17|beta glucosidase 17
Glyma.18G265900	-1.43704	9.92836e-39	UDP-glucoronosyl and UDP-glucosyl transferase	AT3G02100.1|Symbols:|UDP-Glycosyltransferase superfamily protein
Glyma.06G040400	-1.43671	0.000433789	bZIP transcription factor	AT1G45249.1|Symbols:ABF2, AREB1, ATAREB1|abscisic acid responsive elements-binding factor 2
Glyma.09G123800	-1.43648	7.52236e-24	Caleosin related protein	AT1G70680.1|Symbols:|Caleosin-related family protein
Glyma.10G245300	-1.43582	1.57367e-28	Acetyltransferase (GNAT) family	AT2G32020.1|Symbols:|Acyl-CoA N-acyltransferases (NAT) superfamily protein
Glyma.20G062000	-1.43408	1.17488e-07	NUDIX domain	AT5G47650.1|Symbols:ATNUDT2, ATNUDX2, NUDT2|nudix hydrolase homolog 2
Glyma.20G034200	-1.43353	0.00360519	EF hand	AT5G39670.1|Symbols:|Calcium-binding EF-hand family protein
Glyma.08G059900	-1.42716	2.82674e-05	Myb-like DNA-binding domain	AT4G21440.1|Symbols:ATMYB102, ATM4, MYB102|MYB-like 102
Glyma.19G185900	-1.42599	0.000184546	Eukaryotic-type carbonic anhydrase	AT1G08080.1|Symbols:ATACA7, ACA7|alpha carbonic anhydrase 7
Glyma.02G123500	-1.42596	0.00129781	NA	NA
Glyma.16G023000	-1.42476	4.41708e-30	Myb-like DNA-binding domain	AT5G49330.1|Symbols:MYB111, ATMYB111, PFG3|myb domain protein 111
Glyma.04G208300	-1.42218	8.10044e-32	No apical meristem (NAM) protein	AT1G01720.1|Symbols:ATAF1, ANAC002|NAC (No Apical Meristem) domain transcriptional regulator superfamily protein
Glyma.17G125400	-1.41939	5.25115e-53	Cytochrome P450	AT4G13310.1|Symbols:CYP71A20|cytochrome P450, family 71, subfamily A, polypeptide 20
Glyma.19G117900	-1.41928	1.72676e-08	NA	NA
Glyma.15G054500	-1.41921	4.93866e-50	UDP-glucoronosyl and UDP-glucosyl transferase	AT1G22360.1|Symbols:AtUGT85A2, UGT85A2|UDP-glucosyl transferase 85A2
Glyma.16G195600	-1.41849	3.65641e-115	Cytochrome P450	AT3G48270.1|Symbols:CYP71A26|cytochrome P450, family 71, subfamily A, polypeptide 26
Glyma.02G243300	-1.41676	4.04326e-06	NA	NA
Glyma.01G238800	-1.41433	2.16529e-30	Sugar (and other) transporter	AT5G26340.1|Symbols:MSS1, STP13, ATSTP13|Major facilitator superfamily protein
Glyma.08G316000	-1.41278	5.23106e-05	NA	AT3G20340.1|Symbols:|Expression of the gene is downregulated in the presence of paraquat, an inducer of photoxidative stress.
Glyma.17G126300	-1.40986	0.000303284	Papain family cysteine protease; Cathepsin propeptide inhibitor domain (I29)	AT5G50260.1|Symbols:|Cysteine proteinases superfamily protein
Glyma.06G114200	-1.40968	7.82687e-07	Eukaryotic aspartyl protease	AT1G44130.1|Symbols:|Eukaryotic aspartyl protease family protein
Glyma.09G004800	-1.4077	8.03903e-18	NA	AT4G22030.1|Symbols:|F-box family protein with a domain of unknown function (DUF295)
Glyma.08G045200	-1.40604	3.40717e-08	NUDIX domain	AT2G01670.1|Symbols:atnudt17, NUDT17|nudix hydrolase homolog 17
Glyma.02G284800	-1.40511	2.19496e-19	Eukaryotic aspartyl protease	AT3G59080.1|Symbols:|Eukaryotic aspartyl protease family protein
Glyma.08G074200	-1.40483	2.56678e-16	DnaJ domain	AT4G13830.2|Symbols:J20|DNAJ-like 20
Glyma.07G050300	-1.40375	1.5371e-41	S1/P1 Nuclease	AT1G68290.1|Symbols:ENDO 2|endonuclease 2
Glyma.19G094100	-1.4011	3.64745e-19	WRKY DNA -binding domain	AT5G13080.1|Symbols:WRKY75, ATWRKY75|WRKY DNA-binding protein 75
Glyma.13G281200	-1.4007	2.89888e-05	Root cap	AT5G54370.1|Symbols:|Late embryogenesis abundant (LEA) protein-related
Glyma.14G201600	-1.40063	4.72757e-06	Peroxidase	AT5G05340.1|Symbols:|Peroxidase superfamily protein
Glyma.02G233800	-1.39798	8.98565e-18	Peroxidase	AT5G05340.1|Symbols:|Peroxidase superfamily protein
Glyma.13G094900	-1.39718	5.97863e-07	Glycosyl hydrolases family 16; Xyloglucan endo-transglycosylase (XET) C-terminus	AT5G57560.1|Symbols:TCH4, XTH22|Xyloglucan endotransglucosylase/hydrolase family protein
Glyma.09G205700	-1.39598	3.15558e-41	3-beta hydroxysteroid dehydrogenase/isomerase family	AT2G23910.1|Symbols:|NAD(P)-binding Rossmann-fold superfamily protein
Glyma.04G183100	-1.39359	3.95458e-34	RCD1-SRO-TAF4 (RST) plant domain	AT5G62520.1|Symbols:SRO5|similar to RCD one 5
Glyma.06G319700	-1.39311	4.89934e-08	Leucine Rich Repeat; Leucine rich repeat N-terminal domain	AT1G33590.1|Symbols:|Leucine-rich repeat (LRR) family protein
Glyma.11G025200	-1.39204	4.62616e-19	Remorin, C-terminal region	AT5G23750.2|Symbols:|Remorin family protein
Glyma.10G107900	-1.39011	8.13923e-16	UDP-glucoronosyl and UDP-glucosyl transferase	AT2G36770.1|Symbols:|UDP-Glycosyltransferase superfamily protein
Glyma.12G199900	-1.3884	3.12463e-18	Transferase family	AT1G03940.1|Symbols:|HXXXD-type acyl-transferase family protein
Glyma.U000100	-1.38806	5.56249e-10	Cytochrome P450	AT2G45550.1|Symbols:CYP76C4|cytochrome P450, family 76, subfamily C, polypeptide 4
Glyma.07G190100	-1.38754	4.65311e-11	NA	AT1G61340.1|Symbols:|F-box family protein
Glyma.08G178100	-1.38421	1.80868e-19	Nitronate monooxygenase	AT5G64250.2|Symbols:|Aldolase-type TIM barrel family protein
Glyma.03G040900	-1.38334	7.25558e-17	Tubby C 2	AT5G01750.2|Symbols:|Protein of unknown function (DUF567)
Glyma.08G110500	-1.37844	4.96782e-35	Chalcone and stilbene synthases, C-terminal domain; Chalcone and stilbene synthases, N-terminal domain	AT5G13930.1|Symbols:CHS, TT4, ATCHS|Chalcone and stilbene synthase family protein
Glyma.20G118100	-1.37826	0.00419878	Core-2/I-Branching enzyme	AT1G68390.1|Symbols:|Core-2/I-branching beta-1,6-N-acetylglucosaminyltransferase family protein
Glyma.16G078900	-1.37816	0.000127852	Protein kinase domain; Leucine Rich Repeat; Leucine rich repeat N-terminal domain	AT5G25930.1|Symbols:|Protein kinase family protein with leucine-rich repeat domain
Glyma.13G046300	-1.37812	2.95027e-24	Protein of unknown function DUF260	AT3G02550.1|Symbols:LBD41|LOB domain-containing protein 41
Glyma.U008200	-1.37689	0.00685889	Protein of unknown function (DUF1997)	AT5G39530.1|Symbols:|Protein of unknown function (DUF1997)
Glyma.11G046400	-1.37658	4.51866e-14	VQ motif	AT2G22880.1|Symbols:|VQ motif-containing protein
Glyma.20G030700	-1.37548	0.0086479	NA	AT3G11810.1|Symbols:|unknown protein
Glyma.10G184700	-1.37509	1.9486e-32	Potato inhibitor I family	AT2G38870.1|Symbols:|Serine protease inhibitor, potato inhibitor I-type family protein
Glyma.19G151100	-1.37496	7.63834e-22	Dirigent-like protein	AT5G42500.1|Symbols:|Disease resistance-responsive (dirigent-like protein) family protein
Glyma.12G059200	-1.37322	1.88004e-11	short chain dehydrogenase	AT2G29350.1|Symbols:SAG13|senescence-associated gene 13
Glyma.05G007600	-1.37302	4.61748e-05	Fumarate reductase flavoprotein C-term; FAD binding domain	AT5G14760.1|Symbols:AO|L-aspartate oxidase
Glyma.07G256300	-1.37278	4.25986e-21	Family of unknown function (DUF716)	AT1G55230.1|Symbols:|Family of unknown function (DUF716) _x0001_
Glyma.09G236000	-1.36908	6.45995e-05	RNA recognition motif. (a.k.a. RRM, RBD, or RNP domain)	AT3G01150.1|Symbols:PTB, ATPTB1, PTB1|polypyrimidine tract-binding protein 1
Glyma.11G247500	-1.36843	6.21067e-10	NADH-ubiquinone reductase complex 1 MLRQ subunit	AT3G48140.1|Symbols:|B12D protein
Glyma.05G119200	-1.36797	1.58931e-14	DnaJ domain	AT4G13830.2|Symbols:J20|DNAJ-like 20
Glyma.04G201900	-1.36775	2.74005e-05	AP2 domain	AT5G61890.1|Symbols:|Integrase-type DNA-binding superfamily protein
Glyma.18G272400	-1.36649	4.99526e-05	NADH-ubiquinone reductase complex 1 MLRQ subunit	AT3G29970.1|Symbols:|B12D protein
Glyma.11G062700	-1.36597	6.67485e-25	Cytochrome P450	AT3G26300.1|Symbols:CYP71B34|cytochrome P450, family 71, subfamily B, polypeptide 34
Glyma.03G181700	-1.36518	5.50495e-48	Aromatic amino acid lyase	AT2G37040.1|Symbols:PAL1, ATPAL1|PHE ammonia lyase 1
Glyma.09G051900	-1.36401	9.79116e-11	VQ motif	AT4G20000.1|Symbols:|VQ motif-containing protein
Glyma.10G145300	-1.36398	4.59738e-23	Glycosyl transferase family 8	AT2G47180.1|Symbols:AtGolS1, GolS1|galactinol synthase 1
Glyma.01G085700	-1.36322	5.78892e-08	UDP-glucoronosyl and UDP-glucosyl transferase	AT3G02100.1|Symbols:|UDP-Glycosyltransferase superfamily protein
Glyma.04G069800	-1.3631	0.000914112	ABC-2 type transporter; Plant PDR ABC transporter associated; ABC transporter	AT1G15520.1|Symbols:PDR12, ATPDR12, ABCG40, ATABCG40|pleiotropic drug resistance 12
Glyma.18G044200	-1.36057	8.66585e-05	Myb-like DNA-binding domain	AT5G17300.1|Symbols:RVE1|Homeodomain-like superfamily protein
Glyma.07G048600	-1.35892	0.0044273	2OG-Fe(II) oxygenase superfamily	AT4G10490.1|Symbols:|2-oxoglutarate (2OG) and Fe(II)-dependent oxygenase superfamily protein
Glyma.15G102300	-1.35881	3.67768e-10	NA	AT5G18980.1|Symbols:|ARM repeat superfamily protein
Glyma.08G342000	-1.35768	9.23691e-12	Trypsin and protease inhibitor	AT1G73260.1|Symbols:ATKTI1, KTI1|kunitz trypsin inhibitor 1
Glyma.11G235000	-1.35754	8.66327e-54	Hypoxia induced protein conserved region	AT3G05550.1|Symbols:|Hypoxia-responsive family protein
Glyma.13G108800	-1.3575	1.29762e-08	Stress responsive A/B Barrel Domain	AT2G31670.1|Symbols:|Stress responsive alpha-beta barrel domain protein
Glyma.06G100900	-1.35655	5.34232e-11	NA	AT1G35210.1|Symbols:|unknown protein
Glyma.06G191300	-1.35613	3.39955e-25	ABC transporter	AT3G47730.1|Symbols:ATATH1, ATH1, ABCA2|ATP-binding cassette A2
Glyma.02G298500	-1.35356	2.23051e-28	ABC transporter transmembrane region; ABC transporter	AT3G13080.1|Symbols:ATMRP3, MRP3, ABCC3|multidrug resistance-associated protein 3
Glyma.08G058900	-1.35246	7.61983e-07	NA	AT1G61340.1|Symbols:|F-box family protein
Glyma.02G029400	-1.35155	1.21766e-14	NA	AT1G68360.1|Symbols:|C2H2 and C2HC zinc fingers superfamily protein
Glyma.20G130000	-1.35131	3.14053e-59	Peptidase of plants and bacteria	AT2G15220.1|Symbols:|Plant basic secretory protein (BSP) family protein
Glyma.12G221500	-1.35043	1.45458e-16	No apical meristem (NAM) protein	AT3G15500.1|Symbols:ATNAC3, ANAC055, NAC055, NAC3|NAC domain containing protein 3
Glyma.11G144600	-1.3499	6.99617e-09	Exo70 exocyst complex subunit	AT5G59730.2|Symbols:ATEXO70H7, EXO70H7|exocyst subunit exo70 family protein H7
Glyma.13G095300	-1.34977	9.60103e-23	Glycosyl hydrolases family 16; Xyloglucan endo-transglycosylase (XET) C-terminus	AT4G25810.1|Symbols:XTR6, XTH23|xyloglucan endotransglycosylase 6
Glyma.17G071700	-1.34702	0.00563126	Leucine rich repeat N-terminal domain; Protein kinase domain; Leucine Rich Repeat	AT2G24130.1|Symbols:|Leucine-rich receptor-like protein kinase family protein
Glyma.18G036400	-1.34641	7.60747e-13	ATPase family associated with various cellular activities (AAA)	AT2G39730.2|Symbols:RCA|rubisco activase
Glyma.06G111300	-1.34528	9.93316e-07	AP2 domain	AT1G21910.1|Symbols:DREB26|Integrase-type DNA-binding superfamily protein
Glyma.13G221700	-1.34268	1.08281e-10	NA	NA
Glyma.17G187600	-1.34067	0.00208705	NA	NA
Glyma.12G015300	-1.33587	5.23215e-12	Zinc-binding dehydrogenase; Alcohol dehydrogenase GroES-like domain	AT1G22440.1|Symbols:|Zinc-binding alcohol dehydrogenase family protein
Glyma.05G124800	-1.33508	5.37102e-80	FAD binding domain ; Berberine and berberine like	AT5G44440.1|Symbols:|FAD-binding Berberine family protein
Glyma.10G265000	-1.33286	3.16491e-07	NA	AT2G01300.1|Symbols:|unknown protein
Glyma.13G045700	-1.33099	0.00171415	Phosphomannose isomerase type I	AT3G02570.1|Symbols:MEE31, PMI1|Mannose-6-phosphate isomerase, type I
Glyma.19G200200	-1.33041	1.99311e-13	U-box domain	AT3G52450.1|Symbols:PUB22|plant U-box 22
Glyma.17G065300	-1.32878	8.30298e-07	Glycosyl hydrolases family 16; Xyloglucan endo-transglycosylase (XET) C-terminus	AT4G25810.1|Symbols:XTR6, XTH23|xyloglucan endotransglycosylase 6
Glyma.03G215900	-1.32877	0.000323878	Pectinesterase; Plant invertase/pectin methylesterase inhibitor	AT4G02330.1|Symbols:ATPMEPCRB|Plant invertase/pectin methylesterase inhibitor superfamily
Glyma.07G243900	-1.32845	8.12116e-30	Pathogenesis-related protein Bet v I family	AT1G24020.2|Symbols:MLP423|MLP-like protein 423
Glyma.19G162100	-1.32781	0.000212199	Cytochrome P450	AT5G63450.1|Symbols:CYP94B1|cytochrome P450, family 94, subfamily B, polypeptide 1
Glyma.14G030700	-1.32714	0.00218154	No apical meristem (NAM) protein	AT2G43000.1|Symbols:anac042, NAC042|NAC domain containing protein 42
Glyma.10G227400	-1.32284	2.09367e-09	ABC transporter; ABC transporter transmembrane region	AT3G59140.1|Symbols:ATMRP14, MRP14, ABCC10|multidrug resistance-associated protein 14
Glyma.08G110400	-1.32258	2.19789e-20	Chalcone and stilbene synthases, N-terminal domain; Chalcone and stilbene synthases, C-terminal domain	AT5G13930.1|Symbols:CHS, TT4, ATCHS|Chalcone and stilbene synthase family protein
Glyma.11G122600	-1.32188	0.00383241	Cold acclimation protein WCOR413	AT3G50830.1|Symbols:COR413-PM2, ATCOR413-PM2|cold-regulated 413-plasma membrane 2
Glyma.01G005100	-1.32181	7.55601e-25	Family of unknown function (DUF706)	AT2G19800.1|Symbols:MIOX2|myo-inositol oxygenase 2
Glyma.13G201400	-1.32123	0.00116114	Di-glucose binding within endoplasmic reticulum; Protein tyrosine kinase	AT4G39110.1|Symbols:|Malectin/receptor-like protein kinase family protein
Glyma.05G022100	-1.31846	4.55162e-24	Cytochrome P450	AT5G07990.1|Symbols:TT7, CYP75B1, D501|Cytochrome P450 superfamily protein
Glyma.10G253100	-1.31841	1.21203e-08	Protein kinase domain; Salt stress response/antifungal	AT4G38830.1|Symbols:CRK26|cysteine-rich RLK (RECEPTOR-like protein kinase) 26
Glyma.01G007500	-1.31725	4.53281e-13	Protein kinase domain; Leucine Rich Repeat; Leucine rich repeat N-terminal domain	AT5G25930.1|Symbols:|Protein kinase family protein with leucine-rich repeat domain
Glyma.02G104300	-1.31115	2.98518e-35	UDP-glucoronosyl and UDP-glucosyl transferase	AT2G15490.3|Symbols:UGT73B4|UDP-glycosyltransferase 73B4
Glyma.07G044200	-1.31093	0.000133581	GDSL-like Lipase/Acylhydrolase	AT1G53920.1|Symbols:GLIP5|GDSL-motif lipase 5
Glyma.08G087900	-1.30837	8.77171e-10	Glycosyl hydrolases family 28	AT1G48100.1|Symbols:|Pectin lyase-like superfamily protein
Glyma.05G211700	-1.30824	1.17187e-14	Aminotransferase class I and II	AT3G61510.1|Symbols:ACS1, AT-ACS1|ACC synthase 1
Glyma.20G210100	-1.30798	1.75012e-41	NA	AT1G03220.1|Symbols:|Eukaryotic aspartyl protease family protein
Glyma.10G148700	-1.30791	7.63312e-05	Calmodulin binding protein-like	AT5G26920.1|Symbols:CBP60G|Cam-binding protein 60-like G
Glyma.10G010000	-1.30701	4.62616e-19	Glycosyl hydrolases family 28	AT1G02460.1|Symbols:|Pectin lyase-like superfamily protein
Glyma.03G226800	-1.30524	1.99409e-17	Cytochrome P450	AT3G14610.1|Symbols:CYP72A7|cytochrome P450, family 72, subfamily A, polypeptide 7
Glyma.15G012000	-1.30523	3.02854e-49	ABC transporter; ABC-2 type transporter; Plant PDR ABC transporter associated	AT1G15520.1|Symbols:PDR12, ATPDR12, ABCG40, ATABCG40|pleiotropic drug resistance 12
Glyma.14G220100	-1.3042	7.03671e-10	NA	NA
Glyma.08G110700	-1.30363	5.84181e-23	Chalcone and stilbene synthases, C-terminal domain; Chalcone and stilbene synthases, N-terminal domain	AT5G13930.1|Symbols:CHS, TT4, ATCHS|Chalcone and stilbene synthase family protein
Glyma.09G063300	-1.30356	1.63687e-29	Cotton fibre expressed protein	AT4G26130.1|Symbols:|unknown protein
Glyma.06G021000	-1.30198	1.13404e-05	2OG-Fe(II) oxygenase superfamily	AT1G20270.1|Symbols:|2-oxoglutarate (2OG) and Fe(II)-dependent oxygenase superfamily protein
Glyma.02G053600	-1.30111	1.05383e-06	ATPase family associated with various cellular activities (AAA)	AT3G50930.1|Symbols:BCS1|cytochrome BC1 synthesis
Glyma.13G335900	-1.30008	0.000968359	NA	AT5G02390.1|Symbols:|Protein of unknown function (DUF3741)
Glyma.05G136100	-1.29889	1.59043e-05	Pyridoxal-dependent decarboxylase conserved domain	AT2G02010.1|Symbols:GAD4|glutamate decarboxylase 4
Glyma.13G231900	-1.2988	3.54974e-07	NA	AT2G31090.1|Symbols:|unknown protein
Glyma.03G181600	-1.29762	1.38937e-42	Aromatic amino acid lyase	AT2G37040.1|Symbols:PAL1, ATPAL1|PHE ammonia lyase 1
Glyma.06G295400	-1.29435	1.19027e-18	NA	NA
Glyma.03G015500	-1.29275	4.60662e-32	Thioesterase superfamily	AT3G61200.1|Symbols:|Thioesterase superfamily protein
Glyma.16G054400	-1.28841	1.91654e-08	WRKY DNA -binding domain	AT5G13080.1|Symbols:WRKY75, ATWRKY75|WRKY DNA-binding protein 75
Glyma.07G199800	-1.28841	3.91766e-13	MAC/Perforin domain	AT1G28380.1|Symbols:NSL1|MAC/Perforin domain-containing protein
Glyma.19G162200	-1.2884	0.00131279	NA	NA
Glyma.06G256400	-1.28674	1.12295e-07	S-locus glycoprotein family; PAN-like domain; Protein tyrosine kinase; Domain of unknown function (DUF3403); D-mannose binding lectin	AT4G27290.1|Symbols:|S-locus lectin protein kinase family protein
Glyma.10G198200	-1.28672	0.00726536	NA	NA
Glyma.07G262700	-1.28521	5.90173e-28	WRKY DNA -binding domain	AT1G62300.1|Symbols:WRKY6, ATWRKY6|WRKY family transcription factor
Glyma.18G122000	-1.28103	3.22095e-09	Kelch motif	AT2G02870.3|Symbols:|Galactose oxidase/kelch repeat superfamily protein
Glyma.14G014700	-1.27922	3.49969e-05	Serine acetyltransferase, N-terminal	AT3G13110.1|Symbols:ATSERAT2;2, SAT-1, SAT-A, SAT3, SAT-M, SERAT2;2|serine acetyltransferase 2;2
Glyma.19G151200	-1.27877	2.7631e-10	Dirigent-like protein	AT5G42500.1|Symbols:|Disease resistance-responsive (dirigent-like protein) family protein
Glyma.06G133800	-1.27803	2.23994e-08	Homeobox associated leucine zipper; Homeobox domain	AT2G46680.1|Symbols:ATHB-7, ATHB7, HB-7|homeobox 7
Glyma.20G185000	-1.27746	0.00333103	NA	AT3G25655.1|Symbols:IDL1|inflorescence deficient in abscission (IDA)-like 1
Glyma.08G325600	-1.27554	4.53796e-10	Protein kinase domain	AT5G55560.1|Symbols:|Protein kinase superfamily protein
Glyma.17G117100	-1.27437	1.92604e-15	Early nodulin 93 ENOD93 protein	AT5G25940.1|Symbols:|early nodulin-related
Glyma.18G231500	-1.27401	1.1582e-32	Bowman-Birk serine protease inhibitor family	NA
Glyma.11G064400	-1.27395	0.00219521	UDP-glucoronosyl and UDP-glucosyl transferase	AT3G50740.1|Symbols:UGT72E1|UDP-glucosyl transferase 72E1
Glyma.05G022600	-1.27035	0.00480869	UDP-glucose/GDP-mannose dehydrogenase family, central domain; UDP-glucose/GDP-mannose dehydrogenase family, UDP binding domain; UDP-glucose/GDP-mannose dehydrogenase family, NAD binding domain	AT3G29360.2|Symbols:|UDP-glucose 6-dehydrogenase family protein
Glyma.03G039800	-1.2702	5.36724e-15	Peroxidase	AT1G68850.1|Symbols:|Peroxidase superfamily protein
Glyma.08G110900	-1.26996	2.0711e-28	Chalcone and stilbene synthases, N-terminal domain; Chalcone and stilbene synthases, C-terminal domain	AT5G13930.1|Symbols:CHS, TT4, ATCHS|Chalcone and stilbene synthase family protein
Glyma.16G164800	-1.26982	1.73222e-17	AP2 domain	AT2G33710.1|Symbols:|Integrase-type DNA-binding superfamily protein
Glyma.14G056200	-1.2681	0.000166672	AP2 domain	AT2G40340.1|Symbols:DREB2C, AtERF48|Integrase-type DNA-binding superfamily protein
Glyma.20G178000	-1.267	0.00103711	NA	AT4G30230.1|Symbols:|unknown protein
Glyma.14G118700	-1.26613	0.000137907	Protein tyrosine kinase	AT1G67000.1|Symbols:|Protein kinase superfamily protein
Glyma.07G229100	-1.26581	1.53139e-12	No apical meristem (NAM) protein	AT1G69490.1|Symbols:NAP, ANAC029, ATNAP|NAC-like, activated by AP3/PI
Glyma.02G070600	-1.26159	2.63039e-36	No apical meristem (NAM) protein	AT5G18270.1|Symbols:ANAC087|Arabidopsis NAC domain containing protein 87
Glyma.08G045300	-1.25962	0.00240971	NA	AT1G24600.1|Symbols:|unknown protein
Glyma.10G161500	-1.25831	2.19614e-15	NA	AT4G14746.1|Symbols:|EGF-like (InterPro:IPR006210);
Glyma.14G212700	-1.25788	0.00158764	Eukaryotic aspartyl protease	AT1G66180.1|Symbols:|Eukaryotic aspartyl protease family protein
Glyma.01G109800	-1.25765	1.01486e-08	GDP-fucose protein O-fucosyltransferase	AT3G54100.1|Symbols:|O-fucosyltransferase family protein
Glyma.02G089500	-1.25676	5.77198e-19	NA	AT2G47485.1|Symbols:|unknown protein
Glyma.03G264300	-1.25667	6.87989e-14	Lipoxygenase; PLAT/LH2 domain	AT1G72520.1|Symbols:LOX4|PLAT/LH2 domain-containing lipoxygenase family protein
Glyma.07G087300	-1.25512	9.90992e-06	NA	AT2G25735.1|Symbols:|unknown protein
Glyma.18G150600	-1.25326	4.71083e-11	Rhamnogalacturonate lyase family	AT2G22620.1|Symbols:|Rhamnogalacturonate lyase family protein
Glyma.12G144100	-1.25315	0.00541284	S-locus glycoprotein family; PAN-like domain; D-mannose binding lectin; Protein kinase domain	AT4G27290.1|Symbols:|S-locus lectin protein kinase family protein
Glyma.03G263000	-1.25243	2.43083e-16	Zinc finger, C3HC4 type (RING finger)	AT1G72310.1|Symbols:ATL3|RING/U-box superfamily protein
Glyma.20G213500	-1.25171	1.89505e-08	O-methyltransferase; Dimerisation domain	AT4G35160.1|Symbols:|O-methyltransferase family protein
Glyma.02G054900	-1.24832	1.50717e-08	NA	AT2G18210.1|Symbols:|unknown protein
Glyma.20G129900	-1.24818	7.53715e-08	Peptidase of plants and bacteria	AT2G15220.1|Symbols:|Plant basic secretory protein (BSP) family protein
Glyma.01G128100	-1.24801	4.75471e-12	WRKY DNA -binding domain	AT2G38470.1|Symbols:WRKY33, ATWRKY33|WRKY DNA-binding protein 33
Glyma.07G106000	-1.24681	2.45821e-12	U-box domain	AT5G37490.1|Symbols:|ARM repeat superfamily protein
Glyma.13G281100	-1.24627	8.41409e-06	Root cap	AT5G54370.1|Symbols:|Late embryogenesis abundant (LEA) protein-related
Glyma.10G239700	-1.24276	0.000432748	NA	AT4G25433.1|Symbols:|peptidoglycan-binding LysM domain-containing protein
Glyma.19G198600	-1.24191	0.00321908	Late embryogenesis abundant protein	AT2G35980.1|Symbols:YLS9, NHL10, ATNHL10|Late embryogenesis abundant (LEA) hydroxyproline-rich glycoprotein family
Glyma.01G214600	-1.238	4.58006e-08	NA	AT4G22920.1|Symbols:ATNYE1, NYE1|non-yellowing 1
Glyma.08G109200	-1.23735	5.82626e-18	Chalcone and stilbene synthases, C-terminal domain; Chalcone and stilbene synthases, N-terminal domain	AT5G13930.1|Symbols:CHS, TT4, ATCHS|Chalcone and stilbene synthase family protein
Glyma.13G289600	-1.23709	2.85049e-07	DnaJ domain	AT2G42750.1|Symbols:|DNAJ heat shock N-terminal domain-containing protein
Glyma.04G069500	-1.23693	1.97237e-11	HCO3- transporter family	AT1G15460.1|Symbols:ATBOR4, BOR4|HCO3- transporter family
Glyma.06G003100	-1.23517	2.71686e-08	Arabidopsis phospholipase-like protein (PEARLI 4)	AT4G35110.3|Symbols:|Arabidopsis phospholipase-like protein (PEARLI 4) family
Glyma.03G066700	-1.2341	5.73434e-05	Aldo/keto reductase family	AT2G37770.2|Symbols:|NAD(P)-linked oxidoreductase superfamily protein
Glyma.20G135700	-1.23341	1.67018e-06	Phytosulfokine precursor protein (PSK)	AT3G49780.1|Symbols:ATPSK4, ATPSK3 (FORMER SYMBOL), PSK4|phytosulfokine 4 precursor
Glyma.10G237100	-1.2326	0.000197489	NA	NA
Glyma.08G018000	-1.23192	2.28114e-18	Aminotransferase class I and II	AT4G11280.1|Symbols:ACS6, ATACS6|1-aminocyclopropane-1-carboxylic acid (acc) synthase 6
Glyma.08G292000	-1.23026	3.25319e-28	Peptidase dimerisation domain; Peptidase family M20/M25/M40	AT1G51760.1|Symbols:IAR3, JR3|peptidase M20/M25/M40 family protein
Glyma.19G199300	-1.22966	3.17843e-11	U-box domain	AT3G52450.1|Symbols:PUB22|plant U-box 22
Glyma.16G210600	-1.22538	2.23448e-05	TIR domain; NB-ARC domain	AT5G36930.1|Symbols:|Disease resistance protein (TIR-NBS-LRR class) family
Glyma.17G150100	-1.22533	0.00204762	Glycosyl hydrolase family 14	AT4G17090.1|Symbols:CT-BMY, BAM3, BMY8|chloroplast beta-amylase
Glyma.03G061300	-1.22287	1.89835e-75	NA	NA
Glyma.11G129900	-1.22206	3.78514e-38	Glycosyl hydrolase family 1	AT2G44480.1|Symbols:BGLU17|beta glucosidase 17
Glyma.11G027400	-1.21933	1.97926e-11	NA	AT4G22920.1|Symbols:ATNYE1, NYE1|non-yellowing 1
Glyma.10G142600	-1.21892	0.000674119	Helix-loop-helix DNA-binding domain	AT1G09530.2|Symbols:PIF3, POC1, PAP3|phytochrome interacting factor 3
Glyma.07G120900	-1.21823	4.81772e-05	Dynamin GTPase effector domain; Dynamin central region; Dynamin family	AT3G60190.1|Symbols:ADL4, ADLP2, EDR3, DRP1E, ADL1E, DL1E|DYNAMIN-like 1E
Glyma.03G168900	-1.2162	3.25346e-05	Protein of unknown function (DUF861)	AT3G04300.1|Symbols:|RmlC-like cupins superfamily protein
Glyma.08G079100	-1.21589	6.4466e-24	Leucine Rich Repeat; Leucine rich repeat N-terminal domain	AT5G06860.1|Symbols:PGIP1, ATPGIP1|polygalacturonase inhibiting protein 1
Glyma.19G212300	-1.21373	4.67318e-28	Pectinesterase; Plant invertase/pectin methylesterase inhibitor	AT4G02330.1|Symbols:ATPMEPCRB|Plant invertase/pectin methylesterase inhibitor superfamily
Glyma.01G179600	-1.21133	2.03901e-08	Cytochrome P450	AT3G26310.1|Symbols:CYP71B35|cytochrome P450, family 71, subfamily B, polypeptide 35
Glyma.05G107500	-1.21079	1.17756e-09	VQ motif	AT2G22880.1|Symbols:|VQ motif-containing protein
Glyma.06G064900	-1.20946	2.92344e-06	NA	AT2G34200.1|Symbols:|RING/FYVE/PHD zinc finger superfamily protein
Glyma.15G134300	-1.20889	8.02689e-73	FAD binding domain ; Berberine and berberine like	AT1G30700.1|Symbols:|FAD-binding Berberine family protein
Glyma.16G151500	-1.20754	1.14573e-07	No apical meristem (NAM) protein	AT3G04070.1|Symbols:anac047, NAC047|NAC domain containing protein 47
Glyma.14G046500	-1.20728	0.000112169	NA	AT1G05060.1|Symbols:|unknown protein
Glyma.06G157400	-1.20624	1.58962e-43	No apical meristem (NAM) protein	AT1G01720.1|Symbols:ATAF1, ANAC002|NAC (No Apical Meristem) domain transcriptional regulator superfamily protein
Glyma.16G216100	-1.20623	2.34055e-06	eRF1 domain 3; eRF1 domain 1; eRF1 domain 2	AT3G26618.1|Symbols:ERF1-3|eukaryotic release factor 1-3
Glyma.20G099100	-1.20522	1.14383e-05	NA	AT2G37430.1|Symbols:|C2H2 and C2HC zinc fingers superfamily protein
Glyma.08G109300	-1.20522	8.63347e-37	Chalcone and stilbene synthases, C-terminal domain; Chalcone and stilbene synthases, N-terminal domain	AT5G13930.1|Symbols:CHS, TT4, ATCHS|Chalcone and stilbene synthase family protein
Glyma.13G173500	-1.20437	1.63225e-34	Cytochrome P450	AT5G06900.1|Symbols:CYP93D1|cytochrome P450, family 93, subfamily D, polypeptide 1
Glyma.19G087200	-1.2003	1.10736e-08	Uncharacterised protein family (UPF0041)	AT5G20090.2|Symbols:|Uncharacterised protein family (UPF0041)
Glyma.12G054100	-1.19826	2.26356e-12	Glycosyl hydrolase family 1	AT2G44480.1|Symbols:BGLU17|beta glucosidase 17
Glyma.10G272000	-1.19732	1.09618e-09	Core-2/I-Branching enzyme	AT1G68390.1|Symbols:|Core-2/I-branching beta-1,6-N-acetylglucosaminyltransferase family protein
Glyma.15G253500	-1.19723	0.000151063	Protein kinase domain	AT1G16670.1|Symbols:|Protein kinase superfamily protein
Glyma.03G233800	-1.19711	6.82853e-05	F-box domain	AT1G09155.1|Symbols:AtPP2-B15, PP2-B15|phloem protein 2-B15
Glyma.17G152400	-1.19554	4.77877e-07	Triose-phosphate Transporter family	AT4G18210.1|Symbols:ATPUP10, PUP10|purine permease 10
Glyma.10G007000	-1.1946	0.000138262	AP2 domain	AT5G51190.1|Symbols:|Integrase-type DNA-binding superfamily protein
Glyma.08G211100	-1.19299	6.30647e-34	Glyoxalase/Bleomycin resistance protein/Dioxygenase superfamily	AT1G80160.1|Symbols:|Lactoylglutathione lyase / glyoxalase I family protein
Glyma.18G042100	-1.19241	1.8646e-11	U-box domain	AT5G37490.1|Symbols:|ARM repeat superfamily protein
Glyma.10G059200	-1.19235	1.0791e-09	Eukaryotic-type carbonic anhydrase	AT1G08080.1|Symbols:ATACA7, ACA7|alpha carbonic anhydrase 7
Glyma.13G195600	-1.18758	8.73493e-05	NB-ARC domain; Leucine Rich Repeat	AT3G14470.1|Symbols:|NB-ARC domain-containing disease resistance protein
Glyma.03G074900	-1.18602	0.00496109	GDP-fucose protein O-fucosyltransferase	AT2G37980.1|Symbols:|O-fucosyltransferase family protein
Glyma.08G172300	-1.18419	4.36743e-14	NA	AT2G32190.1|Symbols:|unknown protein
Glyma.04G086700	-1.18358	9.17565e-05	Leucine rich repeat N-terminal domain; Protein kinase domain; Leucine Rich Repeat	AT5G25930.1|Symbols:|Protein kinase family protein with leucine-rich repeat domain
Glyma.01G031500	-1.18294	1.0936e-45	Aldehyde dehydrogenase family	AT1G23800.1|Symbols:ALDH2B7, ALDH2B|aldehyde dehydrogenase 2B7
Glyma.08G109500	-1.17952	0.00106738	Chalcone and stilbene synthases, C-terminal domain; Chalcone and stilbene synthases, N-terminal domain	AT5G13930.1|Symbols:CHS, TT4, ATCHS|Chalcone and stilbene synthase family protein
Glyma.20G124200	-1.17861	0.000853124	NA	AT3G03280.1|Symbols:|unknown protein
Glyma.07G073800	-1.17762	0.000221973	short chain dehydrogenase	AT3G61220.1|Symbols:|NAD(P)-binding Rossmann-fold superfamily protein
Glyma.19G197100	-1.17665	7.09861e-09	short chain dehydrogenase	AT2G47140.1|Symbols:|NAD(P)-binding Rossmann-fold superfamily protein
Glyma.14G175400	-1.17452	3.8567e-32	UDP-glucoronosyl and UDP-glucosyl transferase	AT1G22360.1|Symbols:AtUGT85A2, UGT85A2|UDP-glucosyl transferase 85A2
Glyma.18G205600	-1.17413	0.00717801	Leucine rich repeat N-terminal domain; Leucine Rich Repeat	AT3G25010.1|Symbols:AtRLP41, RLP41|receptor like protein 41
Glyma.18G293600	-1.173	1.05744e-05	NA	NA
Glyma.07G087200	-1.17298	0.0001389	Protein of unknown function (DUF1070)	AT5G53250.1|Symbols:AGP22, ATAGP22|arabinogalactan protein 22
Glyma.05G013700	-1.17283	0.000156522	NA	AT1G49000.1|Symbols:|unknown protein
Glyma.04G209200	-1.17266	0.00246322	Transmembrane amino acid transporter protein	AT5G09220.1|Symbols:AAP2|amino acid permease 2
Glyma.06G310100	-1.17179	0.00740894	alpha/beta hydrolase fold	AT1G68620.1|Symbols:|alpha/beta-Hydrolases superfamily protein
Glyma.02G125600	-1.1699	3.95129e-08	GH3 auxin-responsive promoter	AT2G14960.1|Symbols:GH3.1|Auxin-responsive GH3 family protein
Glyma.03G003300	-1.16909	1.33035e-05	D-mannose binding lectin; S-locus glycoprotein family; Protein kinase domain	AT4G00340.1|Symbols:RLK4|receptor-like protein kinase 4
Glyma.01G051300	-1.16755	1.68479e-09	No apical meristem (NAM) protein	AT1G69490.1|Symbols:NAP, ANAC029, ATNAP|NAC-like, activated by AP3/PI
Glyma.03G028500	-1.16753	0.0090005	Plant invertase/pectin methylesterase inhibitor	AT4G00080.1|Symbols:UNE11|Plant invertase/pectin methylesterase inhibitor superfamily protein
Glyma.07G076200	-1.16688	3.21792e-05	C2 domain	AT2G45760.1|Symbols:BAP2, BAL|BON association protein 2
Glyma.03G028700	-1.16668	0.00070019	Transferase family	AT3G26040.1|Symbols:|HXXXD-type acyl-transferase family protein
Glyma.09G071600	-1.16501	2.81087e-43	Divergent CCT motif; tify domain	AT1G19180.1|Symbols:JAZ1, TIFY10A|jasmonate-zim-domain protein 1
Glyma.14G010600	-1.16434	1.29756e-05	DnaJ domain	AT3G13310.1|Symbols:|Chaperone DnaJ-domain superfamily protein
Glyma.01G231000	-1.16397	0.00106103	AP2 domain	AT1G71450.1|Symbols:|Integrase-type DNA-binding superfamily protein
Glyma.01G143500	-1.16293	0.000223051	HSF-type DNA-binding	AT5G62020.1|Symbols:AT-HSFB2A, HSFB2A|heat shock transcription factor B2A
Glyma.10G255800	-1.16234	0.00137633	Phytosulfokine precursor protein (PSK)	AT3G49780.1|Symbols:ATPSK4, ATPSK3 (FORMER SYMBOL), PSK4|phytosulfokine 4 precursor
Glyma.01G124500	-1.16138	1.18591e-13	Ferritin-like domain	AT5G01600.1|Symbols:ATFER1, FER1|ferretin 1
Glyma.08G110300	-1.16098	2.42522e-23	Chalcone and stilbene synthases, C-terminal domain; Chalcone and stilbene synthases, N-terminal domain	AT5G13930.1|Symbols:CHS, TT4, ATCHS|Chalcone and stilbene synthase family protein
Glyma.19G046300	-1.16076	1.27272e-06	Protein of unknown function DUF260	AT3G02550.1|Symbols:LBD41|LOB domain-containing protein 41
Glyma.14G118800	-1.1606	2.30691e-07	Protein kinase domain	AT5G24080.1|Symbols:|Protein kinase superfamily protein
Glyma.04G040400	-1.15985	5.92699e-55	Transferase family	AT5G07850.1|Symbols:|HXXXD-type acyl-transferase family protein
Glyma.08G307600	-1.15985	8.12684e-30	Eukaryotic aspartyl protease	AT3G59080.1|Symbols:|Eukaryotic aspartyl protease family protein
Glyma.19G190000	-1.15914	2.28461e-38	NA	AT3G10040.1|Symbols:|sequence-specific DNA binding transcription factors
Glyma.04G075800	-1.15905	5.00195e-08	NA	AT5G10695.1|Symbols:|unknown protein
Glyma.12G130200	-1.1585	3.32859e-31	Glycosyl hydrolase family 1	AT2G44480.1|Symbols:BGLU17|beta glucosidase 17
Glyma.04G079300	-1.15787	4.14898e-08	NA	AT2G25735.1|Symbols:|unknown protein
Glyma.13G309600	-1.15763	7.97565e-06	NA	NA
Glyma.11G214500	-1.15523	1.17462e-22	U-box domain	AT1G66160.1|Symbols:ATCMPG1, CMPG1|CYS, MET, PRO, and GLY protein 1
Glyma.05G126900	-1.1549	1.05314e-12	Stress up-regulated Nod 19	AT5G61820.1|Symbols:| Stress up-regulated Nod 19
Glyma.08G109400	-1.15485	6.83158e-25	Chalcone and stilbene synthases, N-terminal domain; Chalcone and stilbene synthases, C-terminal domain	AT5G13930.1|Symbols:CHS, TT4, ATCHS|Chalcone and stilbene synthase family protein
Glyma.04G052600	-1.15428	1.18378e-23	Possible lysine decarboxylase	AT5G11950.2|Symbols:|Putative lysine decarboxylase family protein
Glyma.20G205800	-1.15419	1.42363e-19	Potato inhibitor I family	AT2G38870.1|Symbols:|Serine protease inhibitor, potato inhibitor I-type family protein
Glyma.18G118300	-1.15243	0.000141181	NA	AT5G12340.1|Symbols:|unknown protein
Glyma.17G101500	-1.15195	1.37125e-15	No apical meristem (NAM) protein	AT5G61430.1|Symbols:ANAC100, ATNAC5, NAC100|NAC domain containing protein 100
Glyma.07G234400	-1.15158	4.83699e-06	Protein of unknown function, DUF538	AT4G24130.1|Symbols:|Protein of unknown function, DUF538
Glyma.01G146500	-1.14978	2.00095e-09	Zinc finger, C3HC4 type (RING finger)	AT4G28890.1|Symbols:|RING/U-box superfamily protein
Glyma.16G170100	-1.14726	1.08297e-18	Extensin-like region	AT1G21310.1|Symbols:ATEXT3, RSH, EXT3|extensin 3
Glyma.05G215900	-1.14712	8.23789e-22	WRKY DNA -binding domain	AT4G11070.1|Symbols:WRKY41, AtWRKY41|WRKY family transcription factor
Glyma.09G005700	-1.14626	8.53371e-54	WRKY DNA -binding domain	AT1G62300.1|Symbols:WRKY6, ATWRKY6|WRKY family transcription factor
Glyma.15G171000	-1.14515	8.58637e-34	NA	AT4G33050.3|Symbols:EDA39|calmodulin-binding family protein
Glyma.10G180800	-1.14384	6.8085e-16	Myb-like DNA-binding domain	AT3G23250.1|Symbols:MYB15, ATY19, ATMYB15|myb domain protein 15
Glyma.02G009800	-1.14327	0.00106069	Myb-like DNA-binding domain	AT2G47190.1|Symbols:ATMYB2, MYB2|myb domain protein 2
Glyma.02G034200	-1.14254	0.000529053	U-box domain; Armadillo/beta-catenin-like repeat	AT1G60190.1|Symbols:|ARM repeat superfamily protein
Glyma.03G107900	-1.14142	0.00036151	NA	NA
Glyma.09G268100	-1.14058	0.00916922	NA	AT3G60890.2|Symbols:ZPR2|protein binding
Glyma.19G163500	-1.13915	3.12412e-05	Autophagy protein Apg9	AT2G31260.1|Symbols:APG9, ATAPG9|autophagy 9 (APG9)
Glyma.18G110200	-1.13885	4.55644e-17	Eukaryotic aspartyl protease	AT3G59080.1|Symbols:|Eukaryotic aspartyl protease family protein
Glyma.13G161900	-1.13785	0.00106471	Calcineurin-like phosphoesterase	AT5G34850.1|Symbols:ATPAP26, PAP26|purple acid phosphatase 26
Glyma.13G312800	-1.13777	2.97999e-06	U-box domain	AT2G35930.1|Symbols:PUB23|plant U-box 23
Glyma.14G212200	-1.13707	5.01068e-09	U-box domain	AT1G66160.1|Symbols:ATCMPG1, CMPG1|CYS, MET, PRO, and GLY protein 1
Glyma.17G165300	-1.13675	1.71725e-15	GH3 auxin-responsive promoter	AT4G37390.1|Symbols:YDK1, GH3.2, BRU6, GH3-2, AUR3|Auxin-responsive GH3 family protein
Glyma.19G141100	-1.13622	9.06726e-06	Remorin, C-terminal region	AT3G57540.1|Symbols:|Remorin family protein
Glyma.09G192300	-1.13473	0.00203243	Late embryogenesis abundant protein	AT1G45688.1|Symbols:|unknown protein
Glyma.17G128900	-1.13341	0.000277296	EF hand	AT1G76650.3|Symbols:CML38|calmodulin-like 38
Glyma.18G268200	-1.13332	4.65436e-11	Transferase family	AT5G39050.1|Symbols:|HXXXD-type acyl-transferase family protein
Glyma.15G078200	-1.13092	2.1182e-15	Protein tyrosine kinase	AT5G46080.1|Symbols:|Protein kinase superfamily protein
Glyma.15G109500	-1.13037	2.64789e-05	NA	AT4G22030.1|Symbols:|F-box family protein with a domain of unknown function (DUF295)
Glyma.02G125900	-1.13036	6.82498e-14	NA	NA
Glyma.10G023400	-1.13028	3.54727e-11	Protein kinase domain	AT2G48010.1|Symbols:RKF3|receptor-like kinase in in flowers 3
Glyma.18G259000	-1.12973	2.39042e-09	Protein of unknown function (DUF1666)	AT5G39785.1|Symbols:|Protein of unknown function (DUF1666)
Glyma.13G224900	-1.12801	3.26645e-06	Major intrinsic protein	AT4G18910.1|Symbols:NIP1;2, NLM2, ATNLM2|NOD26-like intrinsic protein 1;2
Glyma.15G269100	-1.128	0.00374896	Homeobox associated leucine zipper; Homeobox domain	AT5G06710.1|Symbols:HAT14|homeobox from Arabidopsis thaliana
Glyma.06G145300	-1.1264	1.15998e-23	Peroxidase	AT5G05340.1|Symbols:|Peroxidase superfamily protein
Glyma.20G010200	-1.1261	4.73993e-10	Protein of unknown function (DUF1645)	AT2G15760.1|Symbols:|Protein of unknown function (DUF1645)
Glyma.10G261200	-1.12498	3.50701e-12	Peptidase of plants and bacteria	AT2G15220.1|Symbols:|Plant basic secretory protein (BSP) family protein
Glyma.09G061500	-1.12483	8.97263e-09	Leucine Rich Repeat	AT2G19330.1|Symbols:PIRL6|plant intracellular ras group-related LRR 6
Glyma.14G003800	-1.12479	0.00317127	NA	AT3G13130.1|Symbols:|unknown protein
Glyma.04G231400	-1.12044	1.27574e-06	Homeobox domain; Homeobox associated leucine zipper	AT2G46680.1|Symbols:ATHB-7, ATHB7, HB-7|homeobox 7
Glyma.18G260700	-1.11963	1.46435e-05	EF hand	AT5G39670.1|Symbols:|Calcium-binding EF-hand family protein
Glyma.04G152800	-1.1194	9.63335e-09	NA	AT3G25590.1|Symbols:|unknown protein
Glyma.03G082100	-1.11936	8.81974e-17	Metallothionein	AT3G09390.1|Symbols:MT2A, ATMT-K, ATMT-1|metallothionein 2A
Glyma.08G082400	-1.11834	1.90195e-05	WRKY DNA -binding domain	AT4G18170.1|Symbols:WRKY28, ATWRKY28|WRKY DNA-binding protein 28
Glyma.13G186600	-1.11798	1.70393e-31	Major Facilitator Superfamily	AT5G13750.1|Symbols:ZIFL1|zinc induced facilitator-like 1
Glyma.08G339500	-1.11798	3.45055e-14	NA	NA
Glyma.20G066800	-1.11677	1.44624e-06	Domain of unknown function DUF221	AT4G22120.6|Symbols:|ERD (early-responsive to dehydration stress) family protein
Glyma.02G062900	-1.11598	1.1436e-09	alpha/beta hydrolase fold	AT2G23620.1|Symbols:ATMES1, MES1|methyl esterase 1
Glyma.06G045400	-1.11592	9.91437e-08	NA	AT1G27730.1|Symbols:STZ, ZAT10|salt tolerance zinc finger
Glyma.10G290500	-1.11503	0.000168976	NA	AT2G39490.1|Symbols:|F-box family protein
Glyma.01G195300	-1.11258	4.72127e-06	VQ motif	AT2G22880.1|Symbols:|VQ motif-containing protein
Glyma.12G059100	-1.11215	9.64911e-35	short chain dehydrogenase	AT1G07440.1|Symbols:|NAD(P)-binding Rossmann-fold superfamily protein
Glyma.14G080500	-1.11154	0.000906138	Serine carboxypeptidase	AT3G63470.1|Symbols:scpl40|serine carboxypeptidase-like 40
Glyma.19G014700	-1.11114	0.000372708	Cytochrome P450	AT4G31940.1|Symbols:CYP82C4|cytochrome P450, family 82, subfamily C, polypeptide 4
Glyma.16G019900	-1.11061	4.27662e-37	FAD binding domain ; D-arabinono-1,4-lactone oxidase	AT2G46760.1|Symbols:|D-arabinono-1,4-lactone oxidase family protein
Glyma.05G124900	-1.10955	4.48196e-20	FAD binding domain ; Berberine and berberine like	AT2G34790.1|Symbols:MEE23, EDA28|FAD-binding Berberine family protein
Glyma.16G212400	-1.10897	2.06319e-22	Trypsin and protease inhibitor	AT1G73330.1|Symbols:ATDR4, DR4|drought-repressed 4
Glyma.05G237200	-1.10877	3.77278e-12	Calmodulin binding protein-like	AT1G73805.1|Symbols:|Calmodulin binding protein-like
Glyma.02G241800	-1.10802	0.000357553	Endomembrane protein 70	AT2G01970.1|Symbols:|Endomembrane protein 70 protein family
Glyma.01G030300	-1.10778	3.60317e-10	Protein of unknown function (DUF1645)	AT1G70420.1|Symbols:|Protein of unknown function (DUF1645)
Glyma.03G042700	-1.10763	6.58077e-09	WRKY DNA -binding domain	AT2G38470.1|Symbols:WRKY33, ATWRKY33|WRKY DNA-binding protein 33
Glyma.17G103400	-1.10737	8.97158e-12	Protein kinase domain; Leucine Rich Repeat; Leucine rich repeat N-terminal domain	AT1G74360.1|Symbols:|Leucine-rich repeat protein kinase family protein
Glyma.13G227900	-1.10613	1.43429e-06	Zinc finger, C3HC4 type (RING finger)	AT5G05830.1|Symbols:|RING/FYVE/PHD zinc finger superfamily protein
Glyma.13G340500	-1.10453	1.11115e-07	Mitochondrial carrier protein	AT5G13490.2|Symbols:AAC2|ADP/ATP carrier 2
Glyma.06G114000	-1.1041	5.40415e-05	No apical meristem (NAM) protein	AT1G01720.1|Symbols:ATAF1, ANAC002|NAC (No Apical Meristem) domain transcriptional regulator superfamily protein
Glyma.20G205700	-1.10396	3.53773e-07	Potato inhibitor I family	AT2G38870.1|Symbols:|Serine protease inhibitor, potato inhibitor I-type family protein
Glyma.12G215000	-1.10338	3.76692e-10	Thioredoxin	AT1G11530.1|Symbols:ATCXXS1, CXXS1|C-terminal cysteine residue is changed to a serine 1
Glyma.03G038300	-1.10091	1.02378e-09	Peroxidase	AT5G05340.1|Symbols:|Peroxidase superfamily protein
Glyma.17G037500	-1.10066	7.46902e-13	Myb-like DNA-binding domain	AT5G49620.1|Symbols:AtMYB78, MYB78|myb domain protein 78
Glyma.02G241000	-1.09844	0.00745108	Myb-like DNA-binding domain	AT5G17300.1|Symbols:RVE1|Homeodomain-like superfamily protein
Glyma.12G234700	-1.09801	3.12647e-119	Trypsin and protease inhibitor	AT1G17860.1|Symbols:|Kunitz family trypsin and protease inhibitor protein
Glyma.18G019000	-1.09722	2.10419e-05	STAS domain; Sulfate transporter family	AT5G10180.1|Symbols:AST68, SULTR2;1|slufate transporter 2;1
Glyma.11G153000	-1.09714	1.95318e-06	TIR domain; NB-ARC domain	AT5G17680.1|Symbols:|disease resistance protein (TIR-NBS-LRR class), putative
Glyma.05G160500	-1.09629	0.000546615	Protein of unknown function (DUF1685)	AT2G42760.1|Symbols:|unknown protein
Glyma.10G008600	-1.09611	0.000333499	NA	AT2G31335.1|Symbols:|unknown protein
Glyma.12G097100	-1.09587	1.19544e-05	WRKY DNA -binding domain	AT1G62300.1|Symbols:WRKY6, ATWRKY6|WRKY family transcription factor
Glyma.10G266300	-1.09545	2.13112e-06	NA	AT3G03280.1|Symbols:|unknown protein
Glyma.15G017000	-1.09399	3.39311e-14	POT family	AT1G52190.1|Symbols:|Major facilitator superfamily protein
Glyma.06G321600	-1.09183	1.10452e-11	FAD binding domain ; Berberine and berberine like	AT4G20860.1|Symbols:|FAD-binding Berberine family protein
Glyma.08G021900	-1.08887	7.11978e-12	WRKY DNA -binding domain	AT4G11070.1|Symbols:WRKY41, AtWRKY41|WRKY family transcription factor
Glyma.14G049200	-1.0886	2.69814e-32	2OG-Fe(II) oxygenase superfamily	AT1G05010.1|Symbols:EFE, ACO4, EAT1|ethylene-forming enzyme
Glyma.18G015000	-1.08813	2.92644e-07	NA	NA
Glyma.02G242900	-1.08766	1.46451e-06	U-box domain	AT1G66160.1|Symbols:ATCMPG1, CMPG1|CYS, MET, PRO, and GLY protein 1
Glyma.18G221800	-1.087	0.00131279	NA	AT3G60890.2|Symbols:ZPR2|protein binding
Glyma.14G222400	-1.08439	4.49967e-29	NA	AT1G76070.1|Symbols:|unknown protein
Glyma.11G129600	-1.08093	4.62672e-08	Glycosyl hydrolase family 1	AT2G44480.1|Symbols:BGLU17|beta glucosidase 17
Glyma.02G208200	-1.08051	4.10736e-07	Phosphate-induced protein 1 conserved region	AT4G08950.1|Symbols:EXO|Phosphate-responsive 1 family protein
Glyma.11G230600	-1.07852	5.29297e-10	Protein kinase domain	AT3G55950.1|Symbols:CCR3, ATCRR3|CRINKLY4 related 3
Glyma.04G020700	-1.07783	1.04217e-10	NA	AT1G76070.1|Symbols:|unknown protein
Glyma.15G093900	-1.07623	0.00186519	2OG-Fe(II) oxygenase superfamily	AT1G30040.1|Symbols:ATGA2OX2, GA2OX2|gibberellin 2-oxidase
Glyma.17G147600	-1.07595	1.36994e-31	Pollen allergen; Rare lipoprotein A (RlpA)-like double-psi beta-barrel	AT4G17030.1|Symbols:ATEXLB1, EXPR, AT-EXPR, ATEXPR1, ATHEXP BETA 3.1, EXLB1|expansin-like B1
Glyma.07G243600	-1.07546	2.15736e-46	Pathogenesis-related protein Bet v I family	AT1G24020.2|Symbols:MLP423|MLP-like protein 423
Glyma.11G129500	-1.07421	2.67888e-13	Glycosyl hydrolase family 1	AT5G44640.1|Symbols:BGLU13|beta glucosidase 13
Glyma.08G218600	-1.07281	3.44501e-15	WRKY DNA -binding domain	AT1G80840.1|Symbols:WRKY40, ATWRKY40|WRKY DNA-binding protein 40
Glyma.08G125100	-1.07257	0.000588557	Cytochrome P450	AT5G36110.1|Symbols:CYP716A1|cytochrome P450, family 716, subfamily A, polypeptide 1
Glyma.09G066300	-1.07238	0.00146866	Protein kinase C terminal domain; Protein kinase domain	AT4G33080.1|Symbols:|AGC (cAMP-dependent, cGMP-dependent and protein kinase C) kinase family protein
Glyma.18G054000	-1.07209	2.04435e-05	Pollen allergen; Rare lipoprotein A (RlpA)-like double-psi beta-barrel	AT2G40610.1|Symbols:ATEXPA8, EXP8, ATEXP8, ATHEXP ALPHA 1.11, EXPA8|expansin A8
Glyma.07G076600	-1.0717	1.31444e-08	NA	AT2G45760.1|Symbols:BAP2, BAL|BON association protein 2
Glyma.06G135900	-1.07143	2.78844e-05	NA	AT5G54165.1|Symbols:|unknown protein
Glyma.16G011400	-1.06999	1.64397e-10	Dormancy/auxin associated protein	AT1G54070.1|Symbols:|Dormancy/auxin associated family protein
Glyma.11G010500	-1.06922	0.000432599	AMP-binding enzyme	AT1G65060.1|Symbols:4CL3|4-coumarate:CoA ligase 3
Glyma.03G162600	-1.06857	0.00215396	AP2 domain	AT3G23230.1|Symbols:|Integrase-type DNA-binding superfamily protein
Glyma.09G093800	-1.06821	0.00899761	Flavin-binding monooxygenase-like	AT1G19250.1|Symbols:FMO1|flavin-dependent monooxygenase 1
Glyma.08G158100	-1.06805	7.37963e-13	NA	AT2G31945.1|Symbols:|unknown protein
Glyma.09G225400	-1.06701	4.23904e-08	FAD binding domain ; Cytokinin dehydrogenase 1, FAD and cytokinin binding	AT3G63440.1|Symbols:ATCKX6, CKX6, ATCKX7|cytokinin oxidase/dehydrogenase 6
Glyma.15G064900	-1.06698	0.00209829	D-mannose binding lectin; S-locus glycoprotein family; Protein tyrosine kinase; PAN-like domain	AT1G61490.1|Symbols:|S-locus lectin protein kinase family protein
Glyma.06G302800	-1.06454	1.93291e-09	Translation initiation factor SUI1	AT4G27130.1|Symbols:|Translation initiation factor SUI1 family protein
Glyma.13G302500	-1.06405	1.8266e-11	Transferase family	AT1G03495.1|Symbols:|HXXXD-type acyl-transferase family protein
Glyma.08G330700	-1.06247	6.37483e-27	Cellulose synthase	AT1G55850.1|Symbols:ATCSLE1, CSLE1|cellulose synthase like E1
Glyma.18G013600	-1.06048	0.000516917	Fe-S metabolism associated domain	AT1G67810.1|Symbols:SUFE2|sulfur E2
Glyma.18G141500	-1.05917	4.6155e-12	Protein kinase domain; Salt stress response/antifungal	AT1G70520.1|Symbols:CRK2|cysteine-rich RLK (RECEPTOR-like protein kinase) 2
Glyma.08G200100	-1.05812	4.11202e-24	HAD superfamily, subfamily IIIB (Acid phosphatase)	AT4G25150.1|Symbols:|HAD superfamily, subfamily IIIB acid phosphatase
Glyma.04G123800	-1.05765	1.61239e-18	Alternative oxidase	AT3G22370.1|Symbols:AOX1A, ATAOX1A|alternative oxidase 1A
Glyma.11G018500	-1.05719	4.64328e-05	Mitochondrial carrier protein	AT4G01100.1|Symbols:ADNT1|adenine nucleotide transporter 1
Glyma.18G221300	-1.05703	3.07096e-05	EF hand	AT1G24620.1|Symbols:|EF hand calcium-binding protein family
Glyma.16G170000	-1.05515	3.00383e-14	Extensin-like region	AT1G21310.1|Symbols:ATEXT3, RSH, EXT3|extensin 3
Glyma.09G172100	-1.05475	5.09688e-11	U-box domain	AT1G66160.1|Symbols:ATCMPG1, CMPG1|CYS, MET, PRO, and GLY protein 1
Glyma.13G326800	-1.0543	6.91855e-42	Kelch motif	AT5G60570.1|Symbols:|Galactose oxidase/kelch repeat superfamily protein
Glyma.11G230300	-1.05412	2.81541e-06	Protein kinase domain	AT3G55950.1|Symbols:CCR3, ATCRR3|CRINKLY4 related 3
Glyma.10G079700	-1.05387	0.00131591	NA	AT2G35460.1|Symbols:|Late embryogenesis abundant (LEA) hydroxyproline-rich glycoprotein family
Glyma.02G239800	-1.05254	1.82905e-05	NA	AT5G56550.1|Symbols:OXS3, ATOXS3|oxidative stress 3
Glyma.10G045400	-1.0522	8.42117e-15	NA	AT3G53600.1|Symbols:|C2H2-type zinc finger family protein
Glyma.13G122700	-1.05204	0.0069453	AP2 domain	AT3G23240.1|Symbols:ERF1, ATERF1|ethylene response factor 1
Glyma.02G259700	-1.05182	4.32764e-17	Hypoxia induced protein conserved region	AT3G05550.1|Symbols:|Hypoxia-responsive family protein
Glyma.03G187900	-1.05177	1.94264e-12	2OG-Fe(II) oxygenase superfamily	AT2G36690.1|Symbols:|2-oxoglutarate (2OG) and Fe(II)-dependent oxygenase superfamily protein
Glyma.13G294200	-1.05142	0.000235468	NA	AT2G20562.1|Symbols:|unknown protein
Glyma.08G313200	-1.05061	2.72713e-11	HEAT repeat	AT4G27060.1|Symbols:TOR1, SPR2, CN|ARM repeat superfamily protein
Glyma.06G248900	-1.0484	3.75139e-06	No apical meristem (NAM) protein	AT4G27410.2|Symbols:RD26, ANAC072|NAC (No Apical Meristem) domain transcriptional regulator superfamily protein
Glyma.06G054700	-1.04674	0.000611378	Hsp20/alpha crystallin family	AT5G12020.1|Symbols:HSP17.6II|17.6 kDa class II heat shock protein
Glyma.19G018600	-1.04652	8.73225e-55	ATPase family associated with various cellular activities (AAA)	AT5G40010.1|Symbols:AATP1|AAA-ATPase 1
Glyma.19G169400	-1.04496	8.71131e-20	ABC-2 type transporter; ABC transporter; Plant PDR ABC transporter associated	AT1G15520.1|Symbols:PDR12, ATPDR12, ABCG40, ATABCG40|pleiotropic drug resistance 12
Glyma.08G070200	-1.04472	2.13457e-05	NA	AT2G14095.1|Symbols:|unknown protein
Glyma.17G236700	-1.04219	9.12296e-07	Acyl CoA binding protein	AT4G24230.1|Symbols:ACBP3|acyl-CoA-binding domain 3
Glyma.04G113400	-1.04208	5.91967e-11	FAD binding domain ; Berberine and berberine like	AT4G20860.1|Symbols:|FAD-binding Berberine family protein
Glyma.11G070200	-1.04199	1.94764e-36	NmrA-like family	AT1G75280.1|Symbols:|NmrA-like negative transcriptional regulator family protein
Glyma.13G095200	-1.04116	2.8669e-05	Glycosyl hydrolases family 16; Xyloglucan endo-transglycosylase (XET) C-terminus	AT4G25810.1|Symbols:XTR6, XTH23|xyloglucan endotransglycosylase 6
Glyma.19G218800	-1.04105	0.000163566	Myb-like DNA-binding domain	AT2G47190.1|Symbols:ATMYB2, MYB2|myb domain protein 2
Glyma.16G132500	-1.03968	2.92194e-07	alpha/beta hydrolase fold	AT3G51000.1|Symbols:|alpha/beta-Hydrolases superfamily protein
Glyma.20G154900	-1.03836	0.00223593	LysM domain	AT4G25433.1|Symbols:|peptidoglycan-binding LysM domain-containing protein
Glyma.02G052300	-1.03802	5.12923e-10	alpha/beta hydrolase fold	AT3G51000.1|Symbols:|alpha/beta-Hydrolases superfamily protein
Glyma.17G088500	-1.0375	0.00551316	Triose-phosphate Transporter family; EamA-like transporter family	AT5G33320.1|Symbols:CUE1, PPT, ARAPPT|Glucose-6-phosphate/phosphate translocator-related
Glyma.15G002100	-1.03659	0.00819382	MULE transposase domain; FAR1 DNA-binding domain	AT1G52520.1|Symbols:FRS6|FAR1-related sequence 6
Glyma.19G264200	-1.03643	6.41982e-05	Myb-like DNA-binding domain	AT5G49620.1|Symbols:AtMYB78, MYB78|myb domain protein 78
Glyma.06G192100	-1.03584	0.00806444	Sugar (and other) transporter	AT1G16390.1|Symbols:ATOCT3, 3-Oct|organic cation/carnitine transporter 3
Glyma.05G212600	-1.03545	9.38162e-05	Late embryogenesis abundant protein	AT2G46150.1|Symbols:|Late embryogenesis abundant (LEA) hydroxyproline-rich glycoprotein family
Glyma.17G065200	-1.03484	2.93508e-09	Xyloglucan endo-transglycosylase (XET) C-terminus; Glycosyl hydrolases family 16	AT4G25810.1|Symbols:XTR6, XTH23|xyloglucan endotransglycosylase 6
Glyma.06G315100	-1.03459	7.88278e-13	haloacid dehalogenase-like hydrolase; haloacid dehalogenase-like hydrolase; E1-E2 ATPase	AT5G04930.1|Symbols:ALA1|aminophospholipid ATPase 1
Glyma.06G162200	-1.03365	2.44619e-20	Clp amino terminal domain; ATPase family associated with various cellular activities (AAA); AAA domain (Cdc48 subfamily); C-terminal, D2-small domain, of ClpB protein	AT5G51070.1|Symbols:ERD1, CLPD, SAG15|Clp ATPase
Glyma.14G035600	-1.03297	0.000718287	NA	AT5G12170.2|Symbols:CLT3|CRT (chloroquine-resistance transporter)-like transporter 3
Glyma.09G236800	-1.03174	1.28558e-07	EF hand	AT5G39670.1|Symbols:|Calcium-binding EF-hand family protein
Glyma.16G158100	-1.03166	4.22392e-29	UDP-glucoronosyl and UDP-glucosyl transferase	AT1G05680.1|Symbols:UGT74E2|Uridine diphosphate glycosyltransferase 74E2
Glyma.05G072600	-1.0314	0.00648617	Myb-like DNA-binding domain	AT5G14340.1|Symbols:AtMYB40, MYB40|myb domain protein 40
Glyma.10G201100	-1.03122	5.80101e-24	Pyruvate kinase, barrel domain; Pyruvate kinase, alpha/beta domain	AT3G52990.1|Symbols:|Pyruvate kinase family protein
Glyma.09G038600	-1.03017	5.00555e-13	Glycosyl hydrolase family 3 N terminal domain; Glycosyl hydrolase family 3 C-terminal domain	AT5G49360.1|Symbols:BXL1, ATBXL1|beta-xylosidase 1
Glyma.07G163200	-1.02955	4.27944e-29	G-protein alpha subunit	AT2G23460.1|Symbols:XLG1, ATXLG1|extra-large G-protein 1
Glyma.10G238700	-1.02835	0.000531821	NA	AT3G61060.1|Symbols:AtPP2-A13, PP2-A13|phloem protein 2-A13
Glyma.11G120900	-1.02762	5.40049e-63	LytB protein	AT4G34350.1|Symbols:CLB6, ISPH, HDR|4-hydroxy-3-methylbut-2-enyl diphosphate reductase
Glyma.13G279900	-1.02426	0.00250114	No apical meristem (NAM) protein	AT3G15500.1|Symbols:ATNAC3, ANAC055, NAC055, NAC3|NAC domain containing protein 3
Glyma.08G010400	-1.02405	0.000369376	Auxin responsive protein	AT5G50760.1|Symbols:|SAUR-like auxin-responsive protein family
Glyma.07G188800	-1.02195	4.57686e-14	Protein tyrosine kinase; D-mannose binding lectin; S-locus glycoprotein family; PAN-like domain	AT4G21390.1|Symbols:B120|S-locus lectin protein kinase family protein
Glyma.06G102300	-1.02151	1.27501e-09	UDP-glucoronosyl and UDP-glucosyl transferase	AT1G22380.1|Symbols:AtUGT85A3, UGT85A3|UDP-glucosyl transferase 85A3
Glyma.17G065000	-1.02121	1.37094e-10	Xyloglucan endo-transglycosylase (XET) C-terminus; Glycosyl hydrolases family 16	AT3G23730.1|Symbols:XTH16|xyloglucan endotransglucosylase/hydrolase 16
Glyma.08G147700	-1.02038	1.05689e-07	Protein of unknown function (DUF506)	AT4G14620.1|Symbols:|Protein of unknown function (DUF506) _x0001_
Glyma.18G238800	-1.01971	1.59049e-09	SAM dependent carboxyl methyltransferase	AT1G19640.1|Symbols:JMT|jasmonic acid carboxyl methyltransferase
Glyma.10G286900	-1.01961	9.98524e-06	GRAM domain	AT5G08350.1|Symbols:|GRAM domain-containing protein / ABA-responsive protein-related
Glyma.15G074600	-1.01712	3.10083e-12	Protein kinase domain; Legume lectin domain	AT4G04960.1|Symbols:|Concanavalin A-like lectin protein kinase family protein
Glyma.13G173400	-1.01609	4.5641e-05	NA	NA
Glyma.08G118000	-1.01566	0.00732452	Protein of unknown function (DUF1685)	AT2G42760.1|Symbols:|unknown protein
Glyma.16G080100	-1.01563	0.00230126	Mlo family	AT4G02600.2|Symbols:MLO1, ATMLO1|Seven transmembrane MLO family protein
Glyma.06G087800	-1.01492	8.42584e-44	Malic enzyme, N-terminal domain; Malic enzyme, NAD binding domain	AT5G25880.1|Symbols:ATNADP-ME3, NADP-ME3|NADP-malic enzyme 3
Glyma.20G032400	-1.01475	6.71425e-13	SPX domain; EXS family	AT1G14040.1|Symbols:|EXS (ERD1/XPR1/SYG1) family protein
Glyma.19G254800	-1.01389	0.000213174	WRKY DNA -binding domain	AT4G11070.1|Symbols:WRKY41, AtWRKY41|WRKY family transcription factor
Glyma.12G179800	-1.01349	1.31691e-12	Eukaryotic aspartyl protease	AT5G22850.1|Symbols:|Eukaryotic aspartyl protease family protein
Glyma.03G125600	-1.01305	0.000155685	Serine carboxypeptidase	AT1G28110.2|Symbols:SCPL45|serine carboxypeptidase-like 45
Glyma.14G088300	-1.01262	3.86252e-05	NA	AT1G27730.1|Symbols:STZ, ZAT10|salt tolerance zinc finger
Glyma.06G125600	-1.00971	2.61427e-12	WRKY DNA -binding domain	AT5G24110.1|Symbols:WRKY30, ATWRKY30|WRKY DNA-binding protein 30
Glyma.13G285400	-1.00886	1.20693e-14	GRAS domain family	AT1G50600.1|Symbols:SCL5|scarecrow-like 5
Glyma.06G025200	-1.00704	0.000100856	Possible lysine decarboxylase	AT2G28305.1|Symbols:LOG1, ATLOG1|Putative lysine decarboxylase family protein
Glyma.17G128000	-1.00389	7.59896e-27	Malate synthase	AT5G03860.2|Symbols:MLS|malate synthase
Glyma.09G263500	-1.00316	0.00028621	LysM domain	AT3G52790.1|Symbols:|peptidoglycan-binding LysM domain-containing protein
Glyma.10G023300	-1.00223	3.32409e-07	Protein kinase domain	AT5G35960.1|Symbols:|Protein kinase family protein
Glyma.02G088700	-1.00017	2.25344e-10	Protein tyrosine kinase	AT5G38210.1|Symbols:|Protein kinase family protein
NA: Not analyzed

## Sheet: Control mutant vs wt leaf Up
Supplementary Table 1C. Genes whose expression are up-regulated in the leaf of the gmsos1-1 when compared to the wild type under normal condition.
Soybean gene ID	log2FoldChange	FDR	Annotation	Arabidopsis homologous genes
Glyma.03G055200	11.8999	1.92457e-20	Plant nuclear matrix protein 1 (NMP1)	AT5G17620.1|Symbols:|CONTAINS InterPro DOMAIN/s: Plant nuclear matrix 1 (InterPro:IPR010604)
Glyma.U004700	9.88126	1.06593e-12	NA	AT3G04770.2|Symbols:RPSAb|40s ribosomal protein SA B
Glyma.03G047700	9.72552	3.67225e-10	TIR domain; Leucine Rich Repeat; NB-ARC domain	AT5G17680.1|Symbols:|disease resistance protein (TIR-NBS-LRR class), putative
Glyma.U004600	9.55565	1.17735e-10	NA	NA
Glyma.03G046800	9.04736	2.12383e-07	NA	AT5G01700.2|Symbols:|Protein phosphatase 2C family protein
Glyma.03G054100	9.02572	2.50932e-06	NB-ARC domain; TIR domain	AT5G36930.1|Symbols:|Disease resistance protein (TIR-NBS-LRR class) family
Glyma.03G048300	8.68995	3.46146e-08	NB-ARC domain	AT3G14460.1|Symbols:|LRR and NB-ARC domains-containing disease resistance protein
Glyma.03G048000	8.66527	5.63233e-08	NA	AT1G18950.1|Symbols:|DDT domain superfamily
Glyma.17G251000	8.58564	6.48951e-06	FAE1/Type III polyketide synthase-like protein; 3-Oxoacyl-[acyl-carrier-protein (ACP)] synthase III C terminal	AT1G19440.1|Symbols:KCS4|3-ketoacyl-CoA synthase 4
Glyma.13G278200	8.53632	5.97986e-08	F-box domain	AT5G60610.1|Symbols:|F-box/RNI-like superfamily protein
Glyma.03G053500	8.44486	1.58931e-29	TIR domain; NB-ARC domain	AT5G36930.2|Symbols:|Disease resistance protein (TIR-NBS-LRR class) family
Glyma.15G098800	8.42882	0.00921514	Protein kinase domain	AT5G18700.1|Symbols:RUK, EMB3013|Protein kinase family protein with ARM repeat domain
Glyma.03G053600	8.40974	1.10649e-06	NA	AT5G36930.2|Symbols:|Disease resistance protein (TIR-NBS-LRR class) family
Glyma.05G049100	8.3723	1.47448e-06	GPI transamidase subunit PIG-U	AT1G63110.1|Symbols:|GPI transamidase subunit PIG-U
Glyma.01G189600	8.17248	8.57394e-06	F-box domain	AT5G67250.1|Symbols:SKIP2, VFB4|SKP1/ASK1-interacting protein 2
Glyma.U043300	7.99761	5.56341e-06	short chain dehydrogenase	AT1G49670.1|Symbols:NQR|ARP protein (REF)
Glyma.19G124100	7.2088	0.000386367	Pre-SET motif; SET domain; SAD/SRA domain	AT1G73100.1|Symbols:SUVH3, SDG19|SU(VAR)3-9 homolog 3
Glyma.03G037200	7.06597	0.00418642	NA	AT5G01810.3|Symbols:CIPK15|CBL-interacting protein kinase 15
Glyma.03G039400	7.06588	0.00332151	NA	NA
Glyma.16G144200	6.97736	0.0056992	Protein of unknown function (DUF1162)	AT3G50380.1|Symbols:|Protein of unknown function (DUF1162)
Glyma.03G062700	6.8807	0.00828045	ATP-dependent protease La (LON) domain	AT1G18660.1|Symbols:|zinc finger (C3HC4-type RING finger) family protein
Glyma.13G188800	6.70202	1.33893e-05	Domain of unknown function (DUF3403)	AT4G23180.1|Symbols:CRK10, RLK4|cysteine-rich RLK (RECEPTOR-like protein kinase) 10
Glyma.17G123100	6.68798	0.00991462	Leucine Rich Repeat	AT1G68780.1|Symbols:|RNI-like superfamily protein
Glyma.13G183300	6.57106	8.90469e-07	NA	AT4G04980.1|Symbols:|unknown protein
Glyma.03G048200	6.45917	8.181e-08	NB-ARC domain	AT3G14470.1|Symbols:|NB-ARC domain-containing disease resistance protein
Glyma.08G100800	5.20805	1.44599e-06	Protein tyrosine kinase	AT1G67720.1|Symbols:|Leucine-rich repeat protein kinase family protein
Glyma.01G212800	5.08352	1.70308e-183	ACT domain	AT1G12420.1|Symbols:ACR8|ACT domain repeat 8
Glyma.01G104100	4.94359	2.20218e-40	chorismate binding enzyme	AT1G18870.1|Symbols:ICS2, ATICS2|isochorismate synthase 2
Glyma.03G046500	4.79076	1.08689e-25	NB-ARC domain	AT3G14470.1|Symbols:|NB-ARC domain-containing disease resistance protein
Glyma.03G036800	4.47814	1.28703e-63	Transcription factor TFIID (or TATA-binding protein, TBP)	AT1G55520.2|Symbols:TBP2, ATTBP2|TATA binding protein 2
Glyma.13G200800	4.40331	5.49069e-124	DnaJ domain	AT4G39150.2|Symbols:|DNAJ heat shock N-terminal domain-containing protein
Glyma.13G190800	4.30587	1.1048e-40	NB-ARC domain; Leucine Rich Repeat	AT3G14470.1|Symbols:|NB-ARC domain-containing disease resistance protein
Glyma.03G100500	4.29776	1.03854e-06	NA	NA
Glyma.15G072700	4.0509	5.86311e-08	Zinc finger, C3HC4 type (RING finger)	AT3G47160.1|Symbols:|RING/U-box superfamily protein
Glyma.13G184800	3.82931	0.00113664	NB-ARC domain	AT3G14470.1|Symbols:|NB-ARC domain-containing disease resistance protein
Glyma.06G163000	3.73635	5.37314e-06	NA	AT3G23760.1|Symbols:|FUNCTIONS IN: molecular_function unknown
Glyma.17G119000	3.65047	6.45635e-86	NA	NA
Glyma.06G214400	3.62652	0.000172054	NA	NA
Glyma.03G031000	3.61662	5.51792e-51	Cytochrome P450	AT4G31500.1|Symbols:CYP83B1, SUR2, RNT1, RED1, ATR4|cytochrome P450, family 83, subfamily B, polypeptide 1
Glyma.13G213100	3.61463	1.35216e-10	WD domain, G-beta repeat	AT4G03020.2|Symbols:|transducin family protein / WD-40 repeat family protein
Glyma.03G047000	3.56087	1.44765e-15	NB-ARC domain	AT3G14470.1|Symbols:|NB-ARC domain-containing disease resistance protein
Glyma.13G194900	3.39782	6.64884e-60	TIR domain; NB-ARC domain	AT5G36930.2|Symbols:|Disease resistance protein (TIR-NBS-LRR class) family
Glyma.12G168100	3.35383	0.000201098	NA	NA
Glyma.16G031100	3.16091	0.000138195	Uncharacterized conserved protein (DUF2358)	AT2G46100.1|Symbols:|Nuclear transport factor 2 (NTF2) family protein
Glyma.01G006500	3.09855	3.1596e-07	RNA polymerase Rpb2, domain 5; RNA polymerase Rpb2, domain 4; RNA polymerase Rpb2, domain 2; RNA polymerase Rpb2, domain 3; RNA polymerase beta subunit; RNA polymerase Rpb2, domain 7; RNA polymerase Rpb2, domain 6	AT5G45140.1|Symbols:NRPC2|nuclear RNA polymerase C2
Glyma.17G165200	2.9903	2.57377e-110	Natural resistance-associated macrophage protein	AT2G23150.1|Symbols:NRAMP3, ATNRAMP3|natural resistance-associated macrophage protein 3
Glyma.03G020800	2.96031	2.25624e-69	C2 domain	AT3G61050.2|Symbols:NTMC2TYPE4, NTMC2T4|Calcium-dependent lipid-binding (CaLB domain) family protein
Glyma.11G171200	2.95584	4.49244e-06	Agenet domain; PHD-finger	AT5G58610.1|Symbols:|PHD finger transcription factor, putative
Glyma.03G016900	2.93802	0.00346927	UBX domain	AT4G00752.1|Symbols:|UBX domain-containing protein
Glyma.03G037100	2.89686	8.82944e-13	Leucine Rich Repeat; NB-ARC domain	AT3G14460.1|Symbols:|LRR and NB-ARC domains-containing disease resistance protein
Glyma.17G171100	2.87678	0.000108119	O-methyltransferase	AT4G34050.1|Symbols:CCoAOMT1|S-adenosyl-L-methionine-dependent methyltransferases superfamily protein
Glyma.03G030600	2.80432	6.82526e-20	Cytochrome P450	AT4G31500.1|Symbols:CYP83B1, SUR2, RNT1, RED1, ATR4|cytochrome P450, family 83, subfamily B, polypeptide 1
Glyma.13G190400	2.77917	5.19985e-12	NB-ARC domain	AT3G14470.1|Symbols:|NB-ARC domain-containing disease resistance protein
Glyma.03G034900	2.77286	2.58717e-17	NB-ARC domain; Leucine Rich Repeat	AT3G14470.1|Symbols:|NB-ARC domain-containing disease resistance protein
Glyma.07G202300	2.75691	7.8165e-30	Cytochrome P450	AT5G06900.1|Symbols:CYP93D1|cytochrome P450, family 93, subfamily D, polypeptide 1
Glyma.10G153000	2.7231	1.08689e-25	WRC; Zinc-finger domain of monoamine-oxidase A repressor R1; JmjC domain, hydroxylase	AT1G09060.3|Symbols:|Zinc finger, RING-type;Transcription factor jumonji/aspartyl beta-hydroxylase
Glyma.U034800	2.67263	0.0049347	NA	NA
Glyma.09G115100	2.60716	1.00959e-76	CHY zinc finger; Hemerythrin HHE cation binding domain	AT3G18290.1|Symbols:EMB2454, BTS|zinc finger protein-related
Glyma.16G022200	2.55771	3.55724e-07	Cation transporting ATPase, C-terminus; Cation transporter/ATPase, N-terminus; haloacid dehalogenase-like hydrolase; E1-E2 ATPase	AT4G00900.1|Symbols:ECA2, ATECA2|ER-type Ca2+-ATPase 2
Glyma.20G152000	2.55193	2.30897e-18	Exostosin family	AT5G62220.1|Symbols:ATGT18, GT18|glycosyltransferase 18
Glyma.03G037000	2.31651	1.33748e-11	Leucine Rich Repeat; NB-ARC domain	AT3G14470.1|Symbols:|NB-ARC domain-containing disease resistance protein
Glyma.05G101700	2.28565	1.30083e-47	Natural resistance-associated macrophage protein	AT2G23150.1|Symbols:NRAMP3, ATNRAMP3|natural resistance-associated macrophage protein 3
Glyma.12G158900	2.28466	2.98633e-14	TCP family transcription factor	AT1G53230.1|Symbols:TCP3|TEOSINTE BRANCHED 1, cycloidea and PCF transcription factor 3
Glyma.13G168700	2.27633	5.04726e-36	D-isomer specific 2-hydroxyacid dehydrogenase, catalytic domain; D-isomer specific 2-hydroxyacid dehydrogenase, NAD binding domain	AT5G14780.1|Symbols:FDH|formate dehydrogenase
Glyma.02G282300	2.22913	1.40164e-20	NA	NA
Glyma.14G032000	2.19935	2.74938e-21	NA	NA
Glyma.10G113000	2.14731	0.000774137	NA	AT5G04610.1|Symbols:|S-adenosyl-L-methionine-dependent methyltransferases superfamily protein
Glyma.13G217400	2.14528	2.72741e-19	Cytochrome P450	AT2G34500.1|Symbols:CYP710A1|cytochrome P450, family 710, subfamily A, polypeptide 1
Glyma.09G176300	2.14004	0.00145803	Membrane transport protein	AT1G73590.1|Symbols:PIN1, ATPIN1|Auxin efflux carrier family protein
Glyma.04G236600	2.09096	8.50873e-160	PAP fibrillin; Protein kinase domain	AT5G53450.1|Symbols:ORG1|OBP3-responsive gene 1
Glyma.06G142900	2.00775	2.94346e-61	NA	AT5G05250.1|Symbols:|unknown protein
Glyma.15G044400	2.00013	1.33893e-05	AP2 domain	AT2G28550.3|Symbols:RAP2.7|related to AP2.7
Glyma.05G145000	1.95535	3.21679e-20	ABC transporter; ABC transporter transmembrane region	AT3G13080.1|Symbols:ATMRP3, MRP3, ABCC3|multidrug resistance-associated protein 3
Glyma.03G057500	1.94071	8.26499e-08	DnaJ domain; DnaJ C terminal domain	AT3G08910.1|Symbols:|DNAJ heat shock family protein
Glyma.03G034400	1.93223	3.35024e-16	NB-ARC domain	AT3G14470.1|Symbols:|NB-ARC domain-containing disease resistance protein
Glyma.03G101700	1.91216	3.78821e-37	WAX2 C-terminal domain; Fatty acid hydroxylase superfamily	AT1G02205.2|Symbols:CER1|Fatty acid hydroxylase superfamily
Glyma.07G126400	1.9062	0.000158976	Phosphofructokinase	AT4G26270.1|Symbols:PFK3|phosphofructokinase 3
Glyma.20G195900	1.893	1.13927e-09	AP2 domain	AT5G07580.1|Symbols:|Integrase-type DNA-binding superfamily protein
Glyma.15G128800	1.87623	1.01344e-13	Peroxidase	AT5G06720.1|Symbols:ATPA2, PA2|peroxidase 2
Glyma.03G040100	1.87072	6.94861e-60	Protease inhibitor/seed storage/LTP family	AT2G38540.1|Symbols:LP1, LTP1, ATLTP1|lipid transfer protein 1
Glyma.07G093700	1.84522	1.60961e-16	CHY zinc finger; Hemerythrin HHE cation binding domain	AT3G18290.1|Symbols:EMB2454, BTS|zinc finger protein-related
Glyma.17G065300	1.76964	0.000284395	Glycosyl hydrolases family 16; Xyloglucan endo-transglycosylase (XET) C-terminus	AT4G25810.1|Symbols:XTR6, XTH23|xyloglucan endotransglycosylase 6
Glyma.05G011200	1.7482	4.5786e-26	NA	NA
Glyma.06G139100	1.68144	6.50491e-05	NA	AT5G24630.5|Symbols:BIN4|double-stranded DNA binding
Glyma.09G092700	1.66746	3.43849e-23	Extensin-like protein repeat	AT3G22142.1|Symbols:|Bifunctional inhibitor/lipid-transfer protein/seed storage 2S albumin superfamily protein
Glyma.08G241200	1.66725	0.0012182	Uncharacterized ACR, COG1678	AT3G29240.2|Symbols:|Protein of unknown function (DUF179)
Glyma.13G193500	1.61596	1.51571e-07	Cyclophilin type peptidyl-prolyl cis-trans isomerase/CLD	AT2G38730.1|Symbols:|Cyclophilin-like peptidyl-prolyl cis-trans isomerase family protein
Glyma.04G222500	1.60456	1.25081e-19	NA	AT5G05250.1|Symbols:|unknown protein
Glyma.03G224700	1.603	0.000819454	WRKY DNA -binding domain	AT4G04450.1|Symbols:WRKY42, AtWRKY42|WRKY family transcription factor
Glyma.13G196100	1.59195	3.62151e-05	Gpi16 subunit, GPI transamidase component	AT3G07140.2|Symbols:|GPI transamidase component Gpi16 subunit family protein
Glyma.19G000300	1.56744	1.94971e-13	Diacylglycerol kinase catalytic domain	AT5G23450.2|Symbols:ATLCBK1, LCBK1|long-chain base (LCB) kinase 1
Glyma.08G140600	1.52352	9.29339e-09	Cytochrome P450	AT4G36220.1|Symbols:FAH1, CYP84A1|ferulic acid 5-hydroxylase 1
Glyma.17G098200	1.52181	0.00610483	IQ calmodulin-binding motif	AT1G74690.1|Symbols:IQD31|IQ-domain 31
Glyma.03G202400	1.4637	5.83712e-09	NA	AT3G05675.1|Symbols:|BTB/POZ domain-containing protein
Glyma.13G067700	1.43611	2.78997e-05	Vitamin-D-receptor interacting Mediator subunit 4	AT5G02850.1|Symbols:|hydroxyproline-rich glycoprotein family protein
Glyma.06G127700	1.38754	4.36202e-61	PAP fibrillin; Protein kinase domain	AT5G53450.1|Symbols:ORG1|OBP3-responsive gene 1
Glyma.09G137200	1.38569	0.000812793	Tripeptidyl peptidase II ; Subtilase family	AT4G20850.1|Symbols:TPP2|tripeptidyl peptidase ii
Glyma.10G197600	1.35439	0.00190578	No apical meristem (NAM) protein	AT3G10490.1|Symbols:ANAC051|NAC domain containing protein 52
Glyma.18G246800	1.35126	0.00605097	Formin Homology 2 Domain	AT3G25500.1|Symbols:AFH1, FH1, AHF1, ATFH1|formin homology 1
Glyma.01G229400	1.34652	1.17365e-06	Helicase conserved C-terminal domain; DEAD/DEAH box helicase	AT3G09620.1|Symbols:|P-loop containing nucleoside triphosphate hydrolases superfamily protein
Glyma.03G132700	1.34205	0.0010099	Glycosyl hydrolases family 17	AT3G57270.1|Symbols:BG1|beta-1,3-glucanase 1
Glyma.02G156800	1.33075	3.40195e-58	Legume lectin domain	AT5G10530.1|Symbols:|Concanavalin A-like lectin protein kinase family protein
Glyma.16G188900	1.32072	1.58095e-07	Glycosyl transferase family 90	AT5G23850.1|Symbols:|Arabidopsis thaliana protein of unknown function (DUF821)
Glyma.14G176400	1.31812	4.25779e-05	Phosphate-induced protein 1 conserved region	AT4G08950.1|Symbols:EXO|Phosphate-responsive 1 family protein
Glyma.17G030700	1.31417	0.000167801	COBRA-like protein	AT4G16120.1|Symbols:ATSEB1, COBL7, SEB1|COBRA-like protein-7 precursor
Glyma.15G217100	1.29569	4.87193e-05	Pathogenesis-related protein Bet v I family	AT1G70890.1|Symbols:MLP43|MLP-like protein 43
Glyma.14G060200	1.28907	0.00525909	PH domain	AT5G05710.1|Symbols:|Pleckstrin homology (PH) domain superfamily protein
Glyma.11G089400	1.25487	0.000446718	FERM N-terminal domain ; MyTH4 domain; Kinesin motor domain; FERM central domain	AT5G65930.2|Symbols:ZWI, PKCBP, KCBP|kinesin-like calmodulin-binding protein (ZWICHEL)
Glyma.20G205800	1.23547	7.27588e-05	Potato inhibitor I family	AT2G38870.1|Symbols:|Serine protease inhibitor, potato inhibitor I-type family protein
Glyma.15G071200	1.23355	1.74183e-05	Protein of unknown function (DUF B2219); Common central domain of tyrosinase; Polyphenol oxidase middle domain	NA
Glyma.13G193300	1.23009	4.44167e-07	Leucine Rich Repeat; NB-ARC domain	AT3G14470.1|Symbols:|NB-ARC domain-containing disease resistance protein
Glyma.20G248100	1.22975	5.17723e-08	Helix-loop-helix DNA-binding domain	AT1G05805.1|Symbols:|basic helix-loop-helix (bHLH) DNA-binding superfamily protein
Glyma.18G275300	1.21557	0.00822627	GDP-fucose protein O-fucosyltransferase	AT5G15740.1|Symbols:|O-fucosyltransferase family protein
Glyma.14G210700	1.20153	0.000844095	UTP--glucose-1-phosphate uridylyltransferase	AT5G17310.2|Symbols:UGP2|UDP-glucose pyrophosphorylase 2
Glyma.11G116600	1.19156	0.0018054	Nucleotidyl transferase	AT4G39210.1|Symbols:APL3|Glucose-1-phosphate adenylyltransferase family protein
Glyma.01G142400	1.18322	8.47035e-37	Glycosyl hydrolases family 18	NA
Glyma.08G173500	1.18043	0.00840491	Helicase conserved C-terminal domain; DEAD/DEAH box helicase; Sec63 Brl domain	AT1G20960.2|Symbols:emb1507|U5 small nuclear ribonucleoprotein helicase, putative
Glyma.17G111500	1.18027	0.00325207	BED zinc finger; hAT family C-terminal dimerisation region	AT3G42170.1|Symbols:|BED zinc finger ;hAT family dimerisation domain
Glyma.11G228300	1.17653	5.65176e-05	Transmembrane amino acid transporter protein	AT2G38120.1|Symbols:AUX1, WAV5, PIR1, MAP1|Transmembrane amino acid transporter family protein
Glyma.07G267800	1.1748	3.94182e-12	OPT oligopeptide transporter protein	AT4G16370.1|Symbols:ATOPT3, OPT3|oligopeptide transporter
Glyma.07G155500	1.17386	6.74787e-05	Polyketide cyclase / dehydrase and lipid transport	AT2G38310.1|Symbols:PYL4, RCAR10|PYR1-like 4
Glyma.11G244900	1.13738	3.02964e-06	Pectate lyase	AT1G67750.1|Symbols:|Pectate lyase family protein
Glyma.05G057800	1.13196	3.97093e-08	Protease inhibitor/seed storage/LTP family	AT2G45180.1|Symbols:|Bifunctional inhibitor/lipid-transfer protein/seed storage 2S albumin superfamily protein
Glyma.08G101500	1.13039	0.000348488	ABC transporter transmembrane region; ABC transporter	AT3G13080.1|Symbols:ATMRP3, MRP3, ABCC3|multidrug resistance-associated protein 3
Glyma.03G066600	1.12421	0.000281067	Aldo/keto reductase family	AT2G37770.2|Symbols:|NAD(P)-linked oxidoreductase superfamily protein
Glyma.14G085400	1.12173	0.00126489	Leucine Rich Repeat	AT4G06744.1|Symbols:|Leucine-rich repeat (LRR) family protein
Glyma.09G182600	1.12028	0.000429721	CHY zinc finger; Hemerythrin HHE cation binding domain	AT3G18290.1|Symbols:EMB2454, BTS|zinc finger protein-related
Glyma.10G251400	1.11951	0.000713721	P21-Rho-binding domain	AT2G33460.1|Symbols:RIC1|ROP-interactive CRIB motif-containing protein 1
Glyma.08G180900	1.10732	0.000257579	Glycosyl hydrolase family 3 N terminal domain; Glycosyl hydrolase family 3 C-terminal domain	AT5G64570.1|Symbols:XYL4, ATBXL4|beta-D-xylosidase 4
Glyma.04G247200	1.09873	0.00380341	Myb-like DNA-binding domain; SWIRM domain	AT1G21700.1|Symbols:ATSWI3C, CHB4, SWI3C|SWITCH/sucrose nonfermenting 3C
Glyma.13G207200	1.09508	4.50635e-09	short chain dehydrogenase	AT3G06060.1|Symbols:|NAD(P)-binding Rossmann-fold superfamily protein
Glyma.07G115500	1.09488	1.53835e-13	Patatin-like phospholipase	AT4G37070.2|Symbols:PLP1, PLA IVA, AtPLAIVA|Acyl transferase/acyl hydrolase/lysophospholipase superfamily protein
Glyma.07G006900	1.07776	1.01636e-10	Lipoxygenase; PLAT/LH2 domain	AT1G55020.1|Symbols:LOX1, ATLOX1|lipoxygenase 1
Glyma.16G085600	1.06981	4.64332e-13	Protein of unknown function (DUF506)	AT3G07350.1|Symbols:|Protein of unknown function (DUF506)
Glyma.07G211100	1.06434	1.0243e-16	alpha/beta hydrolase fold	AT1G47480.1|Symbols:|alpha/beta-Hydrolases superfamily protein
Glyma.04G028600	1.04445	0.00642035	Glycosyl hydrolases family 35	AT4G36360.2|Symbols:BGAL3|beta-galactosidase 3
Glyma.12G101800	1.04097	0.000183482	Glycosyl hydrolases family 16; Xyloglucan endo-transglycosylase (XET) C-terminus	AT4G03210.1|Symbols:XTH9|xyloglucan endotransglucosylase/hydrolase 9
Glyma.20G225400	1.03937	0.00165134	NA	AT2G30580.1|Symbols:DRIP2|DREB2A-interacting protein 2
Glyma.13G372900	1.0382	0.00198411	Protein of unknown function (DUF3754)	AT2G46915.1|Symbols:|Protein of unknown function (DUF3754)
Glyma.03G014000	1.0322	1.33127e-07	Sodium/hydrogen exchanger family; TrkA-N domain	AT4G00630.1|Symbols:KEA2, ATKEA2|K+ efflux antiporter 2
Glyma.01G208100	1.03203	1.69949e-07	tRNA synthetases class I (I, L, M and V); Anticodon-binding domain of tRNA	AT1G09620.1|Symbols:|ATP binding;leucine-tRNA ligases;aminoacyl-tRNA ligases;nucleotide binding;ATP binding;aminoacyl-tRNA ligases
Glyma.15G026500	1.02984	4.3956e-06	PLAT/LH2 domain; Lipoxygenase	AT1G55020.1|Symbols:LOX1, ATLOX1|lipoxygenase 1
Glyma.11G106300	1.02803	1.58892e-13	Nodulin-like	AT4G34950.1|Symbols:|Major facilitator superfamily protein
Glyma.06G228800	1.02039	0.00124982	Peptide N-acetyl-beta-D-glucosaminyl asparaginase amidase A	AT3G14920.1|Symbols:|Peptide-N4-(N-acetyl-beta-glucosaminyl)asparagine amidase A protein
Glyma.12G234800	1.01644	0.000570943	Trypsin and protease inhibitor	AT1G17860.1|Symbols:|Kunitz family trypsin and protease inhibitor protein
Glyma.20G037100	1.01283	0.00813191	Domain of unknown function (DUF702)	AT5G12330.1|Symbols:LRP1|Lateral root primordium (LRP) protein-related
Glyma.15G209300	1.00826	0.00142537	Leucine Rich Repeat; Leucine rich repeat N-terminal domain	AT5G06860.1|Symbols:PGIP1, ATPGIP1|polygalacturonase inhibiting protein 1
Glyma.14G083500	1.00807	1.92824e-06	Remorin, C-terminal region	AT1G45207.2|Symbols:|Remorin family protein
Glyma.16G126400	1.00044	0.000822811	Glycosyl hydrolases family 38 C-terminal domain; Alpha mannosidase, middle domain; Glycosyl hydrolases family 38 N-terminal domain	AT5G66150.1|Symbols:|Glycosyl hydrolase family 38 protein
NA: Not analyzed

## Sheet: Control mutant vs wt leaf Down
Supplementary Table 1D. Genes whose expression are down-regulated in the leaf of the gmsos1-1 when compared to the wild type under normal condition.
Soybean gene ID	log2FoldChange	FDR	Annotation	Arabidopsis homologous genes
Glyma.01G055700	-10.9943	2.60777e-16	NA	AT1G15460.1|Symbols:ATBOR4, BOR4|HCO3- transporter family
Glyma.U006200	-9.96916	5.54875e-13	Plant nuclear matrix protein 1 (NMP1)	NA
Glyma.10G012200	-9.52956	4.1918e-08	PPR repeat	AT1G71490.1|Symbols:|Tetratricopeptide repeat (TPR)-like superfamily protein
Glyma.02G215700	-9.10462	4.76007e-97	Matrixin; Putative peptidoglycan binding domain	AT1G70170.1|Symbols:MMP|matrix metalloproteinase
Glyma.11G080600	-9.0867	0.000464191	Aconitase C-terminal domain; Aconitase family (aconitate hydratase)	AT4G35830.1|Symbols:ACO1|aconitase 1
Glyma.06G202100	-8.92246	1.68237e-05	Leo1-like protein	AT5G61150.2|Symbols:VIP4|leo1-like family protein
Glyma.18G173300	-8.87702	7.81969e-09	NA	AT3G24750.1|Symbols:|unknown protein
Glyma.14G103100	-8.76054	2.92455e-08	WRKY DNA -binding domain	AT1G80840.1|Symbols:WRKY40, ATWRKY40|WRKY DNA-binding protein 40
Glyma.16G220900	-8.7521	1.86702e-08	HAD superfamily, subfamily IIIB (Acid phosphatase)	AT2G38600.1|Symbols:|HAD superfamily, subfamily IIIB acid phosphatase
Glyma.20G159400	-8.73433	2.92254e-08	PAR1 protein	AT5G52390.1|Symbols:|PAR1 protein
Glyma.18G167600	-8.646	6.79599e-08	NA	NA
Glyma.14G102900	-8.51763	2.35887e-07	WRKY DNA -binding domain	AT1G80840.1|Symbols:WRKY40, ATWRKY40|WRKY DNA-binding protein 40
Glyma.15G062700	-8.51159	3.91669e-114	Cysteine-rich secretory protein family	AT2G14580.1|Symbols:ATPRB1, PRB1|basic pathogenesis-related protein 1
Glyma.07G244000	-8.47502	3.26246e-07	Heavy-metal-associated domain	AT3G56891.1|Symbols:|Heavy metal transport/detoxification superfamily protein
Glyma.10G089500	-8.39238	1.75953e-05	NA	AT3G21055.1|Symbols:PSBTN|photosystem II subunit T
Glyma.06G307900	-8.32484	3.31323e-06	Cellulose synthase	AT2G32540.1|Symbols:ATCSLB04, CSLB04, ATCSLB4|cellulose synthase-like B4
Glyma.U041300	-8.20997	0.000138821	Sodium/hydrogen exchanger family	AT2G19600.1|Symbols:ATKEA4, KEA4|K+ efflux antiporter 4
Glyma.13G190100	-8.15604	1.63613e-06	Protein of unknown function (DUF667)	AT3G12300.1|Symbols:|unknown protein
Glyma.13G206000	-8.08023	2.22246e-06	NA	AT1G61870.1|Symbols:PPR336|pentatricopeptide repeat 336
Glyma.06G302200	-8.00944	4.40948e-06	Terpene synthase, N-terminal domain; Terpene synthase family, metal binding domain	AT3G25830.1|Symbols:ATTPS-CIN, TPS-CIN|terpene synthase-like sequence-1,8-cineole
Glyma.05G098800	-7.96914	3.07349e-05	haloacid dehalogenase-like hydrolase; E1-E2 ATPase	AT4G37270.1|Symbols:HMA1, ATHMA1|heavy metal atpase 1
Glyma.01G035800	-7.95128	1.03608e-05	NB-ARC domain	AT3G14470.1|Symbols:|NB-ARC domain-containing disease resistance protein
Glyma.16G173900	-7.90425	1.25907e-05	Leucine rich repeat N-terminal domain; Leucine Rich Repeat	AT2G34930.1|Symbols:|disease resistance family protein / LRR family protein
Glyma.16G123600	-7.84068	1.3688e-05	NA	AT4G19350.1|Symbols:EMB3006|embryo defective 3006
Glyma.09G080000	-7.82243	2.14128e-05	WRKY DNA -binding domain	AT4G04450.1|Symbols:WRKY42, AtWRKY42|WRKY family transcription factor
Glyma.05G165800	-7.72436	1.11334e-24	TIR domain; Leucine Rich Repeat; NB-ARC domain; WRKY DNA -binding domain	AT4G27190.1|Symbols:|NB-ARC domain-containing disease resistance protein
Glyma.13G188400	-7.69199	0.00018153	Protein of unknown function (DUF667)	AT3G12300.1|Symbols:|unknown protein
Glyma.11G182000	-7.41946	0.000423789	No apical meristem (NAM) protein	AT5G22380.1|Symbols:anac090, NAC090|NAC domain containing protein 90
Glyma.13G184600	-7.31718	0.00041022	Eukaryotic membrane protein family	AT1G67960.1|Symbols:|CONTAINS InterPro DOMAIN/s: Membrane protein,Tapt1/CMV receptor (InterPro:IPR008010)
Glyma.03G059300	-7.28378	0.00339399	NA	AT1G24120.1|Symbols:ARL1|ARG1-like 1
Glyma.03G147800	-7.04045	0.00708889	Dirigent-like protein	AT3G13650.1|Symbols:|Disease resistance-responsive (dirigent-like protein) family protein
Glyma.13G319900	-6.91357	0.00776375	Transmembrane amino acid transporter protein	AT1G08230.2|Symbols:|Transmembrane amino acid transporter family protein
Glyma.03G233900	-6.9055	0.00633562	F-box domain	AT1G09155.1|Symbols:AtPP2-B15, PP2-B15|phloem protein 2-B15
Glyma.03G199600	-6.86456	0.00402186	short chain dehydrogenase	AT2G47140.1|Symbols:|NAD(P)-binding Rossmann-fold superfamily protein
Glyma.09G282600	-6.81657	0.00811065	NA	AT5G08240.1|Symbols:|unknown protein
Glyma.11G210300	-6.80969	0.00635891	UbiA prenyltransferase family	AT2G18950.1|Symbols:HPT1, TPT1, ATHPT, VTE2|homogentisate phytyltransferase 1
Glyma.15G000100	-6.79549	0.00491959	Microtubule associated protein (MAP65/ASE1 family)	AT2G01910.2|Symbols:ATMAP65-6, MAP65-6|Microtubule associated protein (MAP65/ASE1) family protein
Glyma.09G051600	-6.7929	0.00124982	NA	AT1G55860.1|Symbols:UPL1|ubiquitin-protein ligase 1
Glyma.16G142000	-6.77309	0.00661474	NA	NA
Glyma.04G223200	-6.64302	0.00989507	WRKY DNA -binding domain	AT2G40740.1|Symbols:WRKY55, ATWRKY55|WRKY DNA-binding protein 55
Glyma.16G171200	-6.07287	0.00576365	Leucine rich repeat N-terminal domain; Leucine Rich Repeat	AT2G34930.1|Symbols:|disease resistance family protein / LRR family protein
Glyma.07G048600	-5.99263	4.55112e-06	2OG-Fe(II) oxygenase superfamily	AT4G10490.1|Symbols:|2-oxoglutarate (2OG) and Fe(II)-dependent oxygenase superfamily protein
Glyma.08G189600	-5.83573	1.42731e-15	Lipoxygenase; PLAT/LH2 domain	AT1G55020.1|Symbols:LOX1, ATLOX1|lipoxygenase 1
Glyma.06G272900	-5.72848	5.97058e-12	Papain family cysteine protease	AT5G50260.1|Symbols:|Cysteine proteinases superfamily protein
Glyma.04G108500	-5.37134	0.000355865	Hsp20/alpha crystallin family	AT1G53540.1|Symbols:|HSP20-like chaperones superfamily protein
Glyma.03G048700	-5.36037	1.79297e-07	TIR domain; NB-ARC domain	AT3G04220.1|Symbols:|Disease resistance protein (TIR-NBS-LRR class) family
Glyma.03G048600	-5.20924	2.98888e-29	Leucine Rich Repeat	AT5G51630.3|Symbols:|Disease resistance protein (TIR-NBS-LRR class) family
Glyma.03G046000	-5.19805	4.93066e-06	Dirigent-like protein	AT1G58170.1|Symbols:|Disease resistance-responsive (dirigent-like protein) family protein
Glyma.15G142200	-5.18816	5.2915e-09	NA	NA
Glyma.05G065800	-4.90255	7.49741e-07	Pollen allergen; Rare lipoprotein A (RlpA)-like double-psi beta-barrel	AT4G17030.1|Symbols:ATEXLB1, EXPR, AT-EXPR, ATEXPR1, ATHEXP BETA 3.1, EXLB1|expansin-like B1
Glyma.13G173300	-4.84541	9.80931e-66	O-methyltransferase; Dimerisation domain	AT4G35150.1|Symbols:|O-methyltransferase family protein
Glyma.18G052600	-4.80288	5.81846e-34	NA	AT4G33355.1|Symbols:|Bifunctional inhibitor/lipid-transfer protein/seed storage 2S albumin superfamily protein
Glyma.14G051700	-4.38756	9.77328e-10	NA	AT3G20180.1|Symbols:|Copper transport protein family
Glyma.17G147600	-4.37283	1.04538e-05	Pollen allergen; Rare lipoprotein A (RlpA)-like double-psi beta-barrel	AT4G17030.1|Symbols:ATEXLB1, EXPR, AT-EXPR, ATEXPR1, ATHEXP BETA 3.1, EXLB1|expansin-like B1
Glyma.03G132900	-4.21339	0.000670996	Glycosyl hydrolases family 17	AT3G57270.1|Symbols:BG1|beta-1,3-glucanase 1
Glyma.18G219700	-4.19775	0.00312165	Salt stress response/antifungal; Protein kinase domain	AT1G11410.1|Symbols:|S-locus lectin protein kinase family protein
Glyma.09G045000	-4.17323	0.00710454	Ribosomal protein S21e	AT5G27700.1|Symbols:|Ribosomal protein S21e
Glyma.06G154700	-4.16019	0.0013778	NA	AT1G21390.1|Symbols:emb2170|embryo defective 2170
Glyma.09G040400	-4.00666	1.47552e-12	Pathogenesis-related protein Bet v I family	NA
Glyma.14G051600	-3.99521	0.00905821	Heavy-metal-associated domain	AT4G05030.1|Symbols:|Copper transport protein family
Glyma.16G175100	-3.90754	0.00991462	Leucine Rich Repeat; Leucine rich repeat N-terminal domain	AT3G05660.1|Symbols:AtRLP33, RLP33|receptor like protein 33
Glyma.10G196900	-3.8191	0.0082254	Protein of unknown function, DUF594	AT5G45540.1|Symbols:|Protein of unknown function (DUF594)
Glyma.06G273600	-3.80625	8.36629e-10	Papain family cysteine protease; Cathepsin propeptide inhibitor domain (I29)	AT5G45890.1|Symbols:SAG12|senescence-associated gene 12
Glyma.09G040600	-3.70773	2.41306e-17	Pathogenesis-related protein Bet v I family	NA
Glyma.20G118600	-3.67415	1.09144e-06	Protein kinase domain	AT1G66910.1|Symbols:|Protein kinase superfamily protein
Glyma.05G204800	-3.6611	1.76821e-28	Thaumatin family	AT4G11650.1|Symbols:ATOSM34, OSM34|osmotin 34
Glyma.20G130000	-3.60894	2.02205e-27	Peptidase of plants and bacteria	AT2G15220.1|Symbols:|Plant basic secretory protein (BSP) family protein
Glyma.13G346700	-3.57258	1.98423e-23	Chitinase class I; Chitin recognition protein	AT3G54420.1|Symbols:ATEP3, ATCHITIV, CHIV, EP3|homolog of carrot EP3-3 chitinase
Glyma.15G062400	-3.55118	6.94557e-47	Cysteine-rich secretory protein family	AT2G14580.1|Symbols:ATPRB1, PRB1|basic pathogenesis-related protein 1
Glyma.09G040500	-3.51852	2.5763e-27	Pathogenesis-related protein Bet v I family	NA
Glyma.03G147700	-3.51554	0.00287967	Dirigent-like protein	AT5G42500.1|Symbols:|Disease resistance-responsive (dirigent-like protein) family protein
Glyma.01G160100	-3.41512	9.77793e-110	Chitinase class I	AT3G12500.1|Symbols:ATHCHIB, PR3, PR-3, CHI-B, B-CHI, HCHIB|basic chitinase
Glyma.05G184500	-3.37413	1.02861e-12	WRKY DNA -binding domain	AT5G64810.1|Symbols:WRKY51, ATWRKY51|WRKY DNA-binding protein 51
Glyma.17G030300	-3.3493	2.77105e-05	Pathogenesis-related protein Bet v I family	AT1G24020.2|Symbols:MLP423|MLP-like protein 423
Glyma.12G099300	-3.29314	1.7641e-05	MatE	AT3G21690.1|Symbols:|MATE efflux family protein
Glyma.06G317800	-3.27447	3.38253e-19	Der1-like family	AT4G29330.1|Symbols:DER1|DERLIN-1
Glyma.10G007000	-3.25241	8.21893e-09	AP2 domain	AT5G51190.1|Symbols:|Integrase-type DNA-binding superfamily protein
Glyma.15G145700	-3.21409	5.21792e-05	Pathogenesis-related protein Bet v I family	NA
Glyma.08G339600	-3.18498	6.20567e-71	NA	NA
Glyma.16G174300	-3.17345	3.38536e-07	Leucine rich repeat N-terminal domain	NA
Glyma.04G230000	-3.16598	3.36983e-51	NA	NA
Glyma.17G030100	-3.15058	2.07842e-26	Pathogenesis-related protein Bet v I family	AT1G24020.2|Symbols:MLP423|MLP-like protein 423
Glyma.01G224800	-3.12405	1.5412e-07	WRKY DNA -binding domain	AT4G11070.1|Symbols:WRKY41, AtWRKY41|WRKY family transcription factor
Glyma.20G063100	-3.11357	2.28078e-22	ZIP Zinc transporter	AT3G12750.1|Symbols:ZIP1|zinc transporter 1 precursor
Glyma.13G029200	-3.08621	6.21144e-30	Serine carboxypeptidase	AT3G63470.1|Symbols:scpl40|serine carboxypeptidase-like 40
Glyma.10G235000	-3.07104	0.000295047	PAR1 protein	AT5G52390.1|Symbols:|PAR1 protein
Glyma.13G033000	-3.03287	0.00253346	Protein kinase domain	AT5G38260.1|Symbols:|Protein kinase superfamily protein
Glyma.02G028200	-3.00262	1.39015e-62	Putative peptidoglycan binding domain; Matrixin	AT1G59970.1|Symbols:|Matrixin family protein
Glyma.08G198100	-2.99835	0.000516833	Protein tyrosine kinase	AT4G29990.1|Symbols:|Leucine-rich repeat transmembrane protein kinase protein
Glyma.02G028000	-2.98209	9.54172e-15	Putative peptidoglycan binding domain; Matrixin	AT1G59970.1|Symbols:|Matrixin family protein
Glyma.17G214600	-2.98042	3.84662e-09	Protein kinase domain	AT5G38280.1|Symbols:PR5K|PR5-like receptor kinase
Glyma.08G284000	-2.92844	0.00389178	Major Facilitator Superfamily	AT1G12940.1|Symbols:ATNRT2.5, NRT2.5|nitrate transporter2.5
Glyma.08G339300	-2.88576	8.99394e-36	NA	NA
Glyma.12G021300	-2.84881	1.46083e-09	Glycosyl hydrolases family 17	AT4G16260.1|Symbols:|Glycosyl hydrolase superfamily protein
Glyma.10G010100	-2.83775	1.64788e-10	NA	NA
Glyma.08G198500	-2.80851	1.83293e-06	Protein tyrosine kinase	AT2G19210.1|Symbols:|Leucine-rich repeat transmembrane protein kinase protein
Glyma.16G175000	-2.78998	1.24976e-12	Leucine rich repeat N-terminal domain; Leucine Rich Repeat	AT3G11010.1|Symbols:AtRLP34, RLP34|receptor like protein 34
Glyma.08G339500	-2.7596	3.20032e-73	NA	NA
Glyma.13G183500	-2.75799	5.00842e-18	Common central domain of tyrosinase; Polyphenol oxidase middle domain; Protein of unknown function (DUF B2219)	NA
Glyma.01G127200	-2.73296	3.27746e-42	Dirigent-like protein	AT5G49040.1|Symbols:|Disease resistance-responsive (dirigent-like protein) family protein
Glyma.05G237200	-2.72566	2.26448e-19	Calmodulin binding protein-like	AT1G73805.1|Symbols:|Calmodulin binding protein-like
Glyma.03G017700	-2.68485	6.65397e-13	NA	NA
Glyma.04G242400	-2.67716	0.000406379	NA	AT1G31130.1|Symbols:|unknown protein
Glyma.18G260700	-2.67564	3.29322e-05	EF hand	AT5G39670.1|Symbols:|Calcium-binding EF-hand family protein
Glyma.10G129500	-2.67383	0.000334061	NA	NA
Glyma.01G134600	-2.66283	1.10649e-06	UbiA prenyltransferase family	AT2G18950.1|Symbols:HPT1, TPT1, ATHPT, VTE2|homogentisate phytyltransferase 1
Glyma.06G147100	-2.66172	7.45376e-10	WRKY DNA -binding domain	AT5G64810.1|Symbols:WRKY51, ATWRKY51|WRKY DNA-binding protein 51
Glyma.17G214400	-2.63529	1.22421e-14	Protein kinase domain	AT5G38260.1|Symbols:|Protein kinase superfamily protein
Glyma.07G205400	-2.6201	1.3189e-38	Papain family cysteine protease; Cathepsin propeptide inhibitor domain (I29)	AT3G49340.1|Symbols:|Cysteine proteinases superfamily protein
Glyma.09G236800	-2.60988	3.93307e-08	EF hand	AT5G39670.1|Symbols:|Calcium-binding EF-hand family protein
Glyma.11G207000	-2.60642	8.67852e-78	Protein tyrosine kinase; Salt stress response/antifungal	AT1G70520.1|Symbols:CRK2|cysteine-rich RLK (RECEPTOR-like protein kinase) 2
Glyma.09G016400	-2.58819	3.05337e-06	Heavy-metal-associated domain	AT4G05030.1|Symbols:|Copper transport protein family
Glyma.10G254000	-2.58684	8.02695e-05	Salt stress response/antifungal	AT4G21410.1|Symbols:CRK29|cysteine-rich RLK (RECEPTOR-like protein kinase) 29
Glyma.20G118500	-2.5768	0.00310333	Protein kinase domain	AT5G38260.1|Symbols:|Protein kinase superfamily protein
Glyma.03G098800	-2.52572	0.00147131	Zinc-binding dehydrogenase	AT5G16970.1|Symbols:AT-AER, AER|alkenal reductase
Glyma.18G046300	-2.52113	4.53323e-06	Protein tyrosine kinase; Salt stress response/antifungal	AT1G70520.1|Symbols:CRK2|cysteine-rich RLK (RECEPTOR-like protein kinase) 2
Glyma.09G127200	-2.50645	3.93213e-05	UDP-glucoronosyl and UDP-glucosyl transferase	AT3G16520.3|Symbols:UGT88A1|UDP-glucosyl transferase 88A1
Glyma.08G197700	-2.50103	0.000822811	Protein tyrosine kinase	AT4G29990.1|Symbols:|Leucine-rich repeat transmembrane protein kinase protein
Glyma.03G001500	-2.49219	3.73194e-08	HAD superfamily, subfamily IIIB (Acid phosphatase)	AT2G38600.1|Symbols:|HAD superfamily, subfamily IIIB acid phosphatase
Glyma.06G258000	-2.48637	4.64087e-06	NA	AT4G27280.1|Symbols:|Calcium-binding EF-hand family protein
Glyma.17G214900	-2.48376	3.40922e-12	Protein kinase domain	AT5G38260.1|Symbols:|Protein kinase superfamily protein
Glyma.14G117300	-2.46511	2.03048e-06	NA	NA
Glyma.05G128400	-2.44626	3.05396e-09	NA	NA
Glyma.13G234500	-2.43858	4.44241e-07	Glutaredoxin	AT1G28480.1|Symbols:GRX480, roxy19|Thioredoxin superfamily protein
Glyma.12G156600	-2.41272	0.00253346	Glycosyl hydrolases family 18	AT5G24090.1|Symbols:ATCHIA, CHIA|chitinase A
Glyma.02G009400	-2.41196	0.00708867	NA	NA
Glyma.11G096600	-2.3878	9.54997e-09	No apical meristem (NAM) protein	AT2G17040.1|Symbols:anac036, NAC036|NAC domain containing protein 36
Glyma.17G214100	-2.36899	3.65459e-18	Protein kinase domain	AT5G38260.1|Symbols:|Protein kinase superfamily protein
Glyma.06G310100	-2.33784	1.70493e-99	alpha/beta hydrolase fold	AT1G68620.1|Symbols:|alpha/beta-Hydrolases superfamily protein
Glyma.14G000100	-2.33296	0.00216657	Bacterial extracellular solute-binding proteins, family 3	AT3G51480.1|Symbols:ATGLR3.6, GLR3.6|glutamate receptor 3.6
Glyma.U006300	-2.29474	1.46211e-08	Plant nuclear matrix protein 1 (NMP1)	AT5G17620.1|Symbols:|CONTAINS InterPro DOMAIN/s: Plant nuclear matrix 1 (InterPro:IPR010604)
Glyma.05G147000	-2.28841	2.94442e-07	O-methyltransferase	AT1G67980.1|Symbols:CCOAMT|caffeoyl-CoA 3-O-methyltransferase
Glyma.11G083800	-2.28334	0.00555351	AMP-binding enzyme	AT1G20560.1|Symbols:AAE1|acyl activating enzyme 1
Glyma.18G247600	-2.28236	7.76745e-08	NA	AT5G51160.1|Symbols:|Ankyrin repeat family protein
Glyma.06G137000	-2.27891	1.02735e-30	2OG-Fe(II) oxygenase superfamily	AT5G24530.1|Symbols:DMR6|2-oxoglutarate (2OG) and Fe(II)-dependent oxygenase superfamily protein
Glyma.18G014600	-2.27863	2.52493e-06	Zinc finger, C3HC4 type (RING finger)	AT1G72220.1|Symbols:|RING/U-box superfamily protein
Glyma.06G034700	-2.27363	3.23985e-07	EF hand	AT3G50770.1|Symbols:CML41|calmodulin-like 41
Glyma.13G004400	-2.27049	1.29896e-22	ZIP Zinc transporter	AT3G12750.1|Symbols:ZIP1|zinc transporter 1 precursor
Glyma.10G261200	-2.25252	4.23105e-55	Peptidase of plants and bacteria	AT2G15220.1|Symbols:|Plant basic secretory protein (BSP) family protein
Glyma.18G216800	-2.25052	6.46332e-22	Protein tyrosine kinase; Leucine Rich Repeat; Leucine rich repeat N-terminal domain	AT5G01950.1|Symbols:|Leucine-rich repeat protein kinase family protein
Glyma.05G204600	-2.2103	9.19599e-121	Thaumatin family	AT4G11650.1|Symbols:ATOSM34, OSM34|osmotin 34
Glyma.13G272100	-2.20632	2.46522e-07	Secreted protein acidic and rich in cysteine Ca binding region; Sodium/calcium exchanger protein	AT1G53210.1|Symbols:|sodium/calcium exchanger family protein / calcium-binding EF hand family protein
Glyma.08G178000	-2.20207	5.05579e-11	Phosphate-induced protein 1 conserved region	AT5G64260.1|Symbols:EXL2|EXORDIUM like 2
Glyma.08G142400	-2.18816	2.45183e-12	WRKY DNA -binding domain	AT5G64810.1|Symbols:WRKY51, ATWRKY51|WRKY DNA-binding protein 51
Glyma.18G195200	-2.18578	5.92699e-52	Leucine Rich Repeat; Leucine rich repeat N-terminal domain	AT1G74170.1|Symbols:AtRLP13, RLP13|receptor like protein 13
Glyma.08G339400	-2.16751	1.68658e-45	NA	NA
Glyma.07G096100	-2.14831	1.82183e-05	Protein tyrosine kinase	AT1G18390.2|Symbols:|Protein kinase superfamily protein
Glyma.16G169200	-2.14711	0.000846472	Leucine rich repeat N-terminal domain; Leucine Rich Repeat	AT3G11010.1|Symbols:AtRLP34, RLP34|receptor like protein 34
Glyma.14G002800	-2.14135	6.64247e-10	VQ motif	AT4G39720.1|Symbols:|VQ motif-containing protein
Glyma.20G129900	-2.1411	1.71272e-34	Peptidase of plants and bacteria	AT2G15220.1|Symbols:|Plant basic secretory protein (BSP) family protein
Glyma.11G070600	-2.11824	1.25074e-05	NmrA-like family	NA
Glyma.12G058400	-2.10361	3.14577e-05	NA	AT5G59050.1|Symbols:|unknown protein
Glyma.15G021400	-2.09383	8.44363e-25	Leucine Rich Repeat; Protein tyrosine kinase	AT4G29990.1|Symbols:|Leucine-rich repeat transmembrane protein kinase protein
Glyma.14G069300	-2.07698	5.76761e-05	NA	AT1G49000.1|Symbols:|unknown protein
Glyma.15G062500	-2.069	3.81052e-05	Cysteine-rich secretory protein family	AT2G14580.1|Symbols:ATPRB1, PRB1|basic pathogenesis-related protein 1
Glyma.16G173000	-2.06285	2.07199e-15	Glycosyl hydrolases family 18	AT5G24090.1|Symbols:ATCHIA, CHIA|chitinase A
Glyma.04G244000	-2.05521	0.000922625	Calcium-binding EGF domain; Protein tyrosine kinase	AT1G21270.1|Symbols:WAK2|wall-associated kinase 2
Glyma.08G293200	-2.05341	0.00232908	Glycosyltransferase family 92	AT1G27200.1|Symbols:|Domain of unknown function (DUF23)
Glyma.18G249100	-2.04779	1.82098e-05	PRA1 family protein	AT1G55190.1|Symbols:PRA1.F2, PRA7|PRA1 (Prenylated rab acceptor) family protein
Glyma.17G230500	-2.04421	1.20653e-25	Metallothionein	AT3G09390.1|Symbols:MT2A, ATMT-K, ATMT-1|metallothionein 2A
Glyma.02G029900	-2.01723	1.05857e-14	UDP-glucoronosyl and UDP-glucosyl transferase	AT1G24100.1|Symbols:UGT74B1|UDP-glucosyl transferase 74B1
Glyma.04G003600	-2.00723	0.00633562	NA	AT4G35070.1|Symbols:|SBP (S-ribonuclease binding protein) family protein
Glyma.20G213700	-2.00604	9.42606e-06	O-methyltransferase; Dimerisation domain	AT4G35160.1|Symbols:|O-methyltransferase family protein
Glyma.03G050100	-2.00223	2.21419e-18	Ferritin-like domain	AT5G01600.1|Symbols:ATFER1, FER1|ferretin 1
Glyma.08G128100	-2.0011	6.68804e-11	Plastocyanin-like domain	AT2G02850.1|Symbols:ARPN|plantacyanin
Glyma.08G198900	-1.99531	0.000158976	Protein tyrosine kinase; Leucine Rich Repeat	AT1G51800.1|Symbols:|Leucine-rich repeat protein kinase family protein
Glyma.12G022700	-1.99283	5.12644e-34	No apical meristem (NAM) protein	AT2G17040.1|Symbols:anac036, NAC036|NAC domain containing protein 36
Glyma.U042300	-1.98848	1.36088e-05	DnaJ domain; DnaJ C terminal domain	AT3G08910.1|Symbols:|DNAJ heat shock family protein
Glyma.13G167700	-1.98508	9.30036e-06	POT family	AT2G26690.1|Symbols:|Major facilitator superfamily protein
Glyma.15G021700	-1.98272	3.47705e-07	Protein tyrosine kinase	AT1G51800.1|Symbols:|Leucine-rich repeat protein kinase family protein
Glyma.02G053600	-1.97924	2.05174e-08	ATPase family associated with various cellular activities (AAA)	AT3G50930.1|Symbols:BCS1|cytochrome BC1 synthesis
Glyma.11G001200	-1.97234	1.25164e-13	Leucine Rich Repeat; Leucine rich repeat N-terminal domain	AT3G43740.1|Symbols:|Leucine-rich repeat (LRR) family protein
Glyma.11G193600	-1.96528	3.03254e-10	Glycosyl hydrolases family 16; Xyloglucan endo-transglycosylase (XET) C-terminus	AT2G36870.1|Symbols:XTH32|xyloglucan endotransglucosylase/hydrolase 32
Glyma.04G121000	-1.95586	1.65713e-08	Der1-like family	AT4G29330.1|Symbols:DER1|DERLIN-1
Glyma.13G054900	-1.94668	0.00124982	NA	NA
Glyma.03G015500	-1.94167	1.19246e-30	Thioesterase superfamily	AT3G61200.1|Symbols:|Thioesterase superfamily protein
Glyma.02G042500	-1.92591	3.61483e-24	Chitinase class I; Chitin recognition protein	AT3G12500.1|Symbols:ATHCHIB, PR3, PR-3, CHI-B, B-CHI, HCHIB|basic chitinase
Glyma.06G282600	-1.88104	1.94795e-05	Auxin responsive protein	AT5G18020.1|Symbols:|SAUR-like auxin-responsive protein family
Glyma.09G053700	-1.87924	2.43538e-05	NA	AT3G54070.1|Symbols:|Ankyrin repeat family protein
Glyma.17G007900	-1.87912	0.000698629	Armadillo/beta-catenin-like repeat	AT4G16490.1|Symbols:|ARM repeat superfamily protein
Glyma.13G340500	-1.8767	0.00256752	Mitochondrial carrier protein	AT5G13490.2|Symbols:AAC2|ADP/ATP carrier 2
Glyma.17G030200	-1.87428	6.53845e-27	Pathogenesis-related protein Bet v I family	AT1G24020.2|Symbols:MLP423|MLP-like protein 423
Glyma.09G036400	-1.87155	0.000824673	Nicotianamine synthase protein	AT1G56430.1|Symbols:ATNAS4, NAS4|nicotianamine synthase 4
Glyma.08G164400	-1.86606	2.08275e-15	ZIP Zinc transporter	AT3G12750.1|Symbols:ZIP1|zinc transporter 1 precursor
Glyma.05G230200	-1.84511	0.00296541	NA	AT2G46225.1|Symbols:ABIL1|ABI-1-like 1
Glyma.19G133500	-1.83898	0.000829875	NA	NA
Glyma.06G282700	-1.83082	2.61702e-06	Auxin responsive protein	AT4G38840.1|Symbols:|SAUR-like auxin-responsive protein family
Glyma.07G227200	-1.82568	0.00676393	WRKY DNA -binding domain	AT2G03340.1|Symbols:WRKY3|WRKY DNA-binding protein 3
Glyma.14G038300	-1.81643	5.04056e-60	Cystatin domain	AT3G12490.1|Symbols:ATCYSB, ATCYS6, CYSB|cystatin B
Glyma.02G125900	-1.78647	1.42417e-18	NA	NA
Glyma.07G243500	-1.78074	2.46761e-07	Pathogenesis-related protein Bet v I family	NA
Glyma.07G139400	-1.77686	5.6559e-20	Protease inhibitor/seed storage/LTP family	AT3G53980.2|Symbols:|Bifunctional inhibitor/lipid-transfer protein/seed storage 2S albumin superfamily protein
Glyma.06G078700	-1.77624	0.000337931	Oleosin	AT2G25890.1|Symbols:|Oleosin family protein
Glyma.U036300	-1.76355	0.00202819	Auxin responsive protein	AT5G18020.1|Symbols:|SAUR-like auxin-responsive protein family
Glyma.04G223300	-1.73491	7.22964e-21	WRKY DNA -binding domain	AT3G56400.1|Symbols:WRKY70, ATWRKY70|WRKY DNA-binding protein 70
Glyma.20G139000	-1.73363	9.35329e-08	Protein kinase domain; Salt stress response/antifungal	AT4G38830.1|Symbols:CRK26|cysteine-rich RLK (RECEPTOR-like protein kinase) 26
Glyma.15G059700	-1.73202	0.000755587	OPT oligopeptide transporter protein	AT5G64410.1|Symbols:ATOPT4, OPT4|oligopeptide transporter 4
Glyma.02G028700	-1.72545	9.18823e-28	Putative peptidoglycan binding domain; Matrixin	AT1G59970.1|Symbols:|Matrixin family protein
Glyma.03G244300	-1.72181	0.00176444	Transferase family	AT5G17540.1|Symbols:|HXXXD-type acyl-transferase family protein
Glyma.01G069000	-1.71599	0.00492968	NA	NA
Glyma.01G124500	-1.70105	5.06304e-20	Ferritin-like domain	AT5G01600.1|Symbols:ATFER1, FER1|ferretin 1
Glyma.16G122700	-1.68438	0.00517936	Eukaryotic aspartyl protease	AT2G17760.1|Symbols:|Eukaryotic aspartyl protease family protein
Glyma.15G088000	-1.68282	6.45455e-07	Hsp70 protein	AT1G16030.1|Symbols:Hsp70b|heat shock protein 70B
Glyma.13G024100	-1.68229	0.000143588	NA	NA
Glyma.15G021800	-1.67651	0.00327395	Protein tyrosine kinase	AT1G51800.1|Symbols:|Leucine-rich repeat protein kinase family protein
Glyma.02G114100	-1.6706	6.1676e-18	NA	NA
Glyma.02G059600	-1.66555	1.2904e-08	EF hand	AT3G50770.1|Symbols:CML41|calmodulin-like 41
Glyma.02G125800	-1.6591	1.38917e-06	NA	NA
Glyma.11G251800	-1.65903	2.99406e-06	NA	AT1G27300.1|Symbols:|unknown protein
Glyma.17G224300	-1.65509	4.04801e-17	Protein kinase domain; Reverse transcriptase (RNA-dependent DNA polymerase); Legume lectin domain	AT5G10530.1|Symbols:|Concanavalin A-like lectin protein kinase family protein
Glyma.15G172600	-1.65339	1.3509e-11	Protein kinase domain	AT4G29810.1|Symbols:ATMKK2, MKK2, MK1|MAP kinase kinase 2
Glyma.04G233800	-1.64133	0.00265743	NA	NA
Glyma.18G191600	-1.63632	2.00941e-14	Protease inhibitor/seed storage/LTP family	AT5G55410.1|Symbols:|Bifunctional inhibitor/lipid-transfer protein/seed storage 2S albumin superfamily protein
Glyma.07G155200	-1.63295	4.76447e-25	Ferritin-like domain	AT5G01600.1|Symbols:ATFER1, FER1|ferretin 1
Glyma.18G285800	-1.63017	6.92633e-09	Aldo/keto reductase family	AT1G59960.1|Symbols:|NAD(P)-linked oxidoreductase superfamily protein
Glyma.18G213200	-1.62194	9.98158e-20	WRKY DNA -binding domain	AT3G56400.1|Symbols:WRKY70, ATWRKY70|WRKY DNA-binding protein 70
Glyma.16G100100	-1.62181	2.45971e-07	Protease inhibitor/seed storage/LTP family	AT2G37870.1|Symbols:|Bifunctional inhibitor/lipid-transfer protein/seed storage 2S albumin superfamily protein
Glyma.11G097100	-1.61497	0.00159628	Late embryogenesis abundant protein	AT2G41990.1|Symbols:|CONTAINS InterPro DOMAIN/s: Late embryogenesis abundant protein, group 2
Glyma.10G028000	-1.60286	0.0091482	Kelch motif	AT3G63220.1|Symbols:|Galactose oxidase/kelch repeat superfamily protein
Glyma.11G206900	-1.60095	9.89354e-07	Protein kinase domain; Salt stress response/antifungal	AT5G40380.1|Symbols:CRK42|cysteine-rich RLK (RECEPTOR-like protein kinase) 42
Glyma.13G033500	-1.59425	0.00168574	Protein kinase domain	AT1G66910.1|Symbols:|Protein kinase superfamily protein
Glyma.12G179600	-1.58776	5.9849e-13	Serine carboxypeptidase S28	AT5G22860.1|Symbols:|Serine carboxypeptidase S28 family protein
Glyma.10G204500	-1.58724	0.00667825	Ribosomal protein S16	AT5G56940.1|Symbols:|Ribosomal protein S16 family protein
Glyma.16G204500	-1.58015	0.00302803	NA	NA
Glyma.06G141600	-1.56733	0.00526096	NA	AT5G05220.1|Symbols:|unknown protein
Glyma.17G069500	-1.562	6.89219e-13	NA	NA
Glyma.08G321400	-1.54974	6.71454e-17	Eukaryotic aspartyl protease	AT5G10770.1|Symbols:|Eukaryotic aspartyl protease family protein
Glyma.17G112900	-1.54556	4.62955e-07	Plastocyanin-like domain	AT5G26330.1|Symbols:|Cupredoxin superfamily protein
Glyma.14G212400	-1.54529	0.000777509	NA	NA
Glyma.08G044400	-1.53518	1.75144e-07	Calmodulin binding protein-like	AT1G73805.1|Symbols:|Calmodulin binding protein-like
Glyma.09G185100	-1.52681	1.85663e-24	NA	NA
Glyma.08G179600	-1.52433	1.02932e-10	Peroxidase	AT5G64120.1|Symbols:|Peroxidase superfamily protein
Glyma.20G080400	-1.52188	3.94318e-05	NA	NA
Glyma.18G205800	-1.52072	9.94188e-39	Ferritin-like domain	AT5G01600.1|Symbols:ATFER1, FER1|ferretin 1
Glyma.05G002200	-1.51816	2.70266e-11	Protease inhibitor/seed storage/LTP family	AT3G18280.1|Symbols:|Bifunctional inhibitor/lipid-transfer protein/seed storage 2S albumin superfamily protein
Glyma.18G220500	-1.50442	0.00167293	NAD dependent epimerase/dehydratase family	AT2G45400.1|Symbols:BEN1|NAD(P)-binding Rossmann-fold superfamily protein
Glyma.14G195000	-1.49091	0.000283525	Asparagine synthase	AT3G47340.1|Symbols:ASN1, DIN6, AT-ASN1|glutamine-dependent asparagine synthase 1
Glyma.14G198700	-1.47821	3.67577e-24	Calcineurin-like phosphoesterase	AT1G07010.1|Symbols:|Calcineurin-like metallo-phosphoesterase superfamily protein
Glyma.16G064200	-1.47375	0.000917509	Protein kinase domain; Leucine Rich Repeat; Leucine rich repeat N-terminal domain	AT4G08850.1|Symbols:|Leucine-rich repeat receptor-like protein kinase family protein
Glyma.03G247500	-1.47221	1.91753e-10	Barwin family	AT3G04720.1|Symbols:PR4, HEL, PR-4|pathogenesis-related 4
Glyma.02G134000	-1.4718	0.00103511	alpha/beta hydrolase fold	AT1G47480.1|Symbols:|alpha/beta-Hydrolases superfamily protein
Glyma.04G102800	-1.46384	3.38345e-06	Sugar (and other) transporter	AT1G34580.1|Symbols:|Major facilitator superfamily protein
Glyma.12G126500	-1.46231	0.00161569	Auxin responsive protein	AT4G38840.1|Symbols:|SAUR-like auxin-responsive protein family
Glyma.17G233300	-1.4598	0.00572391	NA	NA
Glyma.13G188300	-1.45376	0.000106658	Leucine Rich Repeat; NB-ARC domain	AT3G14470.1|Symbols:|NB-ARC domain-containing disease resistance protein
Glyma.08G092000	-1.45353	3.38837e-05	Cyclic nucleotide-binding domain; Sodium/hydrogen exchanger family	AT2G01980.1|Symbols:SOS1, ATSOS1, ATNHX7|sodium proton exchanger, putative (NHX7) (SOS1)
Glyma.07G211000	-1.45057	0.00387381	alpha/beta hydrolase fold	AT1G47480.1|Symbols:|alpha/beta-Hydrolases superfamily protein
Glyma.15G141600	-1.43164	1.82551e-10	NA	NA
Glyma.04G109400	-1.42808	7.5909e-08	UDP-glucoronosyl and UDP-glucosyl transferase	AT1G22340.1|Symbols:AtUGT85A7, UGT85A7|UDP-glucosyl transferase 85A7
Glyma.04G227900	-1.42596	0.00532204	2OG-Fe(II) oxygenase superfamily	AT5G24530.1|Symbols:DMR6|2-oxoglutarate (2OG) and Fe(II)-dependent oxygenase superfamily protein
Glyma.07G052100	-1.42585	0.00926045	Homeobox associated leucine zipper; Homeobox domain	AT2G46680.1|Symbols:ATHB-7, ATHB7, HB-7|homeobox 7
Glyma.13G282900	-1.4194	0.000617326	NA	AT5G54490.1|Symbols:PBP1|pinoid-binding protein 1
Glyma.08G136400	-1.41336	0.00797686	ABC transporter; ABC transporter transmembrane region 2	AT4G39850.1|Symbols:PXA1, PED3, CTS, ACN2, AtABCD1|peroxisomal ABC transporter 1
Glyma.11G095100	-1.41167	2.91404e-10	Glycosyl hydrolases family 17	AT4G16260.1|Symbols:|Glycosyl hydrolase superfamily protein
Glyma.06G281800	-1.40691	0.000530035	Auxin responsive protein	AT4G38840.1|Symbols:|SAUR-like auxin-responsive protein family
Glyma.03G147900	-1.3915	0.00883464	Dirigent-like protein	AT3G13650.1|Symbols:|Disease resistance-responsive (dirigent-like protein) family protein
Glyma.19G164300	-1.38975	8.52949e-07	Sugar (and other) transporter	AT3G54700.1|Symbols:PHT1;7|phosphate transporter 1;7
Glyma.01G004200	-1.38129	0.000203427	O-methyltransferase	AT4G26220.1|Symbols:|S-adenosyl-L-methionine-dependent methyltransferases superfamily protein
Glyma.06G142000	-1.37798	1.92495e-10	WRKY DNA -binding domain	AT3G56400.1|Symbols:WRKY70, ATWRKY70|WRKY DNA-binding protein 70
Glyma.01G168400	-1.3727	4.73602e-15	Glyoxalase/Bleomycin resistance protein/Dioxygenase superfamily	AT1G80160.1|Symbols:|Lactoylglutathione lyase / glyoxalase I family protein
Glyma.12G009200	-1.36481	4.71138e-06	Methyltransferase domain; Sterol methyltransferase C-terminal	AT5G13710.2|Symbols:SMT1, CPH|sterol methyltransferase 1
Glyma.13G116700	-1.36021	7.9508e-05	Eukaryotic aspartyl protease; Saposin-like type B, region 2; Saposin-like type B, region 1	AT1G11910.1|Symbols:APA1, ATAPA1|aspartic proteinase A1
Glyma.09G248600	-1.33887	4.10146e-28	Calreticulin family	AT1G08450.1|Symbols:CRT3, PSL1, EBS2, AtCRT3|calreticulin 3
Glyma.11G142900	-1.32902	0.000125305	Myb-like DNA-binding domain	AT5G59780.3|Symbols:MYB59, ATMYB59-3|myb domain protein 59
Glyma.04G190400	-1.32368	6.17696e-10	Protein kinase domain; Leucine Rich Repeat	AT2G31880.1|Symbols:SOBIR1, EVR|Leucine-rich repeat protein kinase family protein
Glyma.11G207500	-1.323	5.35192e-05	Protein tyrosine kinase; Salt stress response/antifungal	AT1G70520.1|Symbols:CRK2|cysteine-rich RLK (RECEPTOR-like protein kinase) 2
Glyma.03G090200	-1.3227	0.000174532	Protein kinase domain; D-mannose binding lectin	AT5G60900.1|Symbols:RLK1|receptor-like protein kinase 1
Glyma.09G090900	-1.30585	1.57298e-07	Cyclophilin type peptidyl-prolyl cis-trans isomerase/CLD	AT2G38730.1|Symbols:|Cyclophilin-like peptidyl-prolyl cis-trans isomerase family protein
Glyma.14G222700	-1.30293	2.71498e-20	Prolyl oligopeptidase family; Prolyl oligopeptidase, N-terminal beta-propeller domain	AT1G76140.1|Symbols:|Prolyl oligopeptidase family protein
Glyma.17G227800	-1.29838	0.000216811	Glycosyl hydrolases family 32 C terminal; Glycosyl hydrolases family 32 N-terminal domain	AT1G55120.1|Symbols:ATFRUCT5, AtcwINV3, FRUCT5|beta-fructofuranosidase 5
Glyma.07G117400	-1.28598	8.24817e-05	Protein tyrosine kinase	AT5G47070.1|Symbols:|Protein kinase superfamily protein
Glyma.06G024500	-1.28281	0.000988517	Gibberellin regulated protein	AT1G75750.2|Symbols:GASA1|GAST1 protein homolog 1
Glyma.16G079500	-1.27572	0.000295047	NA	AT5G41761.1|Symbols:|unknown protein
Glyma.01G234000	-1.27193	0.00150211	PLATZ transcription factor	AT1G32700.1|Symbols:|PLATZ transcription factor family protein
Glyma.09G036900	-1.26714	0.00433591	NA	NA
Glyma.15G141500	-1.25628	0.000210152	NA	NA
Glyma.13G161900	-1.25332	1.55823e-36	Calcineurin-like phosphoesterase	AT5G34850.1|Symbols:ATPAP26, PAP26|purple acid phosphatase 26
Glyma.06G194600	-1.253	0.00459782	NA	AT3G47510.1|Symbols:|unknown protein
Glyma.14G140400	-1.23714	3.18984e-06	Bacterial-like globin	AT4G32690.1|Symbols:GLB3, ATGLB3|hemoglobin 3
Glyma.06G156300	-1.23562	0.00222329	Lipase (class 3)	AT3G52430.1|Symbols:PAD4, ATPAD4|alpha/beta-Hydrolases superfamily protein
Glyma.16G080800	-1.23134	0.00248401	Yippee zinc-binding/DNA-binding /Mis18, centromere assembly	AT4G27745.1|Symbols:|Yippee family putative zinc-binding protein
Glyma.16G142500	-1.22031	0.000717504	EF hand	AT3G50770.1|Symbols:CML41|calmodulin-like 41
Glyma.11G075000	-1.22004	1.22696e-09	Glyoxalase/Bleomycin resistance protein/Dioxygenase superfamily	AT1G80160.1|Symbols:|Lactoylglutathione lyase / glyoxalase I family protein
Glyma.10G139400	-1.21229	0.00183018	haloacid dehalogenase-like hydrolase	AT3G62040.1|Symbols:|Haloacid dehalogenase-like hydrolase (HAD) superfamily protein
Glyma.13G065300	-1.20867	5.55384e-06	NA	NA
Glyma.18G190000	-1.20865	3.42906e-06	Protease inhibitor/seed storage/LTP family	AT3G53980.2|Symbols:|Bifunctional inhibitor/lipid-transfer protein/seed storage 2S albumin superfamily protein
Glyma.13G260400	-1.20865	0.00253346	NA	NA
Glyma.03G234800	-1.2074	4.39548e-05	Dormancy/auxin associated protein	AT1G56220.1|Symbols:|Dormancy/auxin associated family protein
Glyma.20G003100	-1.20195	1.86541e-14	LysM domain	AT5G08200.1|Symbols:|peptidoglycan-binding LysM domain-containing protein
Glyma.16G178000	-1.19331	9.16005e-05	Heavy-metal-associated domain	AT1G01490.2|Symbols:|Heavy metal transport/detoxification superfamily protein
Glyma.14G014200	-1.19039	0.00469155	NA	AT3G13130.1|Symbols:|unknown protein
Glyma.01G009200	-1.18146	3.38128e-06	Polyketide cyclase / dehydrase and lipid transport	AT2G25770.2|Symbols:|Polyketide cyclase/dehydrase and lipid transport superfamily protein
Glyma.06G282200	-1.1813	0.00996745	Auxin responsive protein	AT2G21210.1|Symbols:|SAUR-like auxin-responsive protein family
Glyma.20G148900	-1.18112	7.21527e-05	Homocysteine S-methyltransferase	AT3G22740.1|Symbols:HMT3|homocysteine S-methyltransferase 3
Glyma.02G244600	-1.16486	0.000263514	Myb-like DNA-binding domain	AT1G66230.1|Symbols:MYB20, AtMYB20|myb domain protein 20
Glyma.16G217100	-1.15579	0.000223228	Nucleotide-diphospho-sugar transferase	AT1G14590.1|Symbols:|Nucleotide-diphospho-sugar transferase family protein
Glyma.14G118500	-1.155	0.00813191	NA	AT1G31130.1|Symbols:|unknown protein
Glyma.14G069600	-1.15452	0.00177436	Armadillo/beta-catenin-like repeat	AT3G03440.1|Symbols:|ARM repeat superfamily protein
Glyma.04G040600	-1.15128	0.0030818	Sulfite exporter TauE/SafE	AT2G25737.1|Symbols:|Sulfite exporter TauE/SafE family protein
Glyma.09G049700	-1.15001	8.26887e-05	PA domain	AT1G30900.1|Symbols:VSR6, VSR3;3, BP80-3;3|VACUOLAR SORTING RECEPTOR 6
Glyma.11G206700	-1.13571	6.83831e-11	Salt stress response/antifungal; Protein kinase domain	AT1G70520.1|Symbols:CRK2|cysteine-rich RLK (RECEPTOR-like protein kinase) 2
Glyma.13G195600	-1.13005	0.0061029	NB-ARC domain; Leucine Rich Repeat	AT3G14470.1|Symbols:|NB-ARC domain-containing disease resistance protein
Glyma.18G022700	-1.1275	1.14161e-10	Wound-induced protein WI12	AT3G10985.1|Symbols:SAG20, WI12, ATWI-12|senescence associated gene 20
Glyma.19G257800	-1.12355	0.000727997	NA	AT2G46600.1|Symbols:|Calcium-binding EF-hand family protein
Glyma.05G063600	-1.12134	4.37692e-09	AP2 domain	AT4G17500.1|Symbols:ATERF-1, ERF-1|ethylene responsive element binding factor 1
Glyma.09G152100	-1.116	1.30996e-05	Iron-binding zinc finger CDGSH type	AT5G51720.1|Symbols:|2 iron, 2 sulfur cluster binding
Glyma.12G224000	-1.11425	0.00182977	Protein of unknown function (DUF2921)	AT4G21700.1|Symbols:|Protein of unknown function (DUF2921)
Glyma.13G284700	-1.10894	0.00445146	NA	AT5G54540.1|Symbols:|Uncharacterised conserved protein (UCP012943)
Glyma.15G113300	-1.10823	4.63256e-05	short chain dehydrogenase	AT4G05530.1|Symbols:IBR1, SDRA|indole-3-butyric acid response 1
Glyma.01G061000	-1.10023	0.00666072	NA	NA
Glyma.01G222700	-1.09407	0.00511726	FAD-binding domain; Respiratory burst NADPH oxidase; Ferric reductase NAD binding domain; Ferric reductase like transmembrane component	AT1G64060.1|Symbols:ATRBOH F, ATRBOHF, RBOHAP108, RBOHF, RBOH F|respiratory burst oxidase protein F
Glyma.19G159500	-1.09376	0.00404338	HSF-type DNA-binding	AT3G22830.1|Symbols:AT-HSFA6B, HSFA6B|heat shock transcription factor A6B
Glyma.03G157300	-1.08982	0.0034019	HSF-type DNA-binding	AT3G22830.1|Symbols:AT-HSFA6B, HSFA6B|heat shock transcription factor A6B
Glyma.01G204800	-1.08899	6.17065e-19	Pollen allergen; Rare lipoprotein A (RlpA)-like double-psi beta-barrel	AT4G17030.1|Symbols:ATEXLB1, EXPR, AT-EXPR, ATEXPR1, ATHEXP BETA 3.1, EXLB1|expansin-like B1
Glyma.13G365200	-1.08568	0.000134755	NA	AT5G25360.2|Symbols:|unknown protein
Glyma.12G092900	-1.06372	2.55782e-10	short chain dehydrogenase	AT2G47140.1|Symbols:|NAD(P)-binding Rossmann-fold superfamily protein
Glyma.16G203100	-1.05005	1.98114e-09	Iron-binding zinc finger CDGSH type	AT5G51720.1|Symbols:|2 iron, 2 sulfur cluster binding
Glyma.03G034100	-1.04984	4.41029e-06	Sec61beta family	AT3G60540.2|Symbols:|Preprotein translocase Sec, Sec61-beta subunit protein
Glyma.17G245500	-1.04541	0.000697961	Arabidopsis broad-spectrum mildew resistance protein RPW8; Leucine Rich Repeat; NB-ARC domain	AT4G33300.2|Symbols:ADR1-L1|ADR1-like 1
Glyma.13G267100	-1.04152	0.000146427	NA	NA
Glyma.02G262500	-1.03892	2.66934e-07	Ferritin-like domain	AT2G40300.1|Symbols:ATFER4, FER4|ferritin 4
Glyma.19G006700	-1.03695	2.05562e-11	Universal stress protein family	AT5G14680.1|Symbols:|Adenine nucleotide alpha hydrolases-like superfamily protein
Glyma.06G172600	-1.03506	9.30253e-11	Glyceraldehyde 3-phosphate dehydrogenase, NAD binding domain; Glyceraldehyde 3-phosphate dehydrogenase, C-terminal domain	AT1G13440.1|Symbols:GAPC-2, GAPC2|glyceraldehyde-3-phosphate dehydrogenase C2
Glyma.11G185300	-1.03091	0.00155842	Male sterility protein; Male sterility protein	AT4G33790.1|Symbols:CER4, G7, FAR3|Jojoba acyl CoA reductase-related male sterility protein
Glyma.10G069000	-1.02215	0.00510086	Transcription elongation factor Elf1 like	AT5G46030.1|Symbols:|unknown protein
Glyma.18G063200	-1.01506	0.00015726	Sodium/calcium exchanger protein	AT2G38170.1|Symbols:CAX1, ATCAX1, RCI4|cation exchanger 1
Glyma.08G166000	-1.0105	7.78965e-05	Eukaryotic aspartyl protease	AT2G35615.1|Symbols:|Eukaryotic aspartyl protease family protein
Glyma.17G165600	-1.00311	0.00537444	NA	AT1G24625.1|Symbols:ZFP7|zinc finger protein 7
NA: Not analyzed
